# Supplementary material
Source: PubMed Central journal article supplement (PMC3633530)
Supplement: NIHMS446048-supplement-1_si_001.pdf [file NIHMS446048-supplement-1_si_001.pdf]

# **Trihydroxamate Siderophore-Fluoroquinolone Conjugates are Selective Sideromycin Antibiotics that Target *Staphylococcus aureus***

## **Supporting Information**

Timothy A. Wencewicz<sup>a</sup>, Timothy E. Long<sup>a,b</sup>, Ute Möllmann<sup>c</sup>, and Marvin J. Miller<sup>a\*</sup>

<sup>a</sup>*Department of Chemistry and Biochemistry, 251 Nieuwland Science Hall, University of Notre  
Dame, Notre Dame, IN 46556, USA*

<sup>b</sup>*Current address: Department of Pharmaceutical and Biomedical Sciences, University of  
Georgia, Athens, GA 30602, USA*

<sup>c</sup>*Leibniz Institute for Natural Product Research and Infection Biology, Hans Knöll Institute,  
Beutenbergstrasse 11a, 07745 Jena, Germany*

### **Table of Contents**

|             |                                                                              |                      |
|-------------|------------------------------------------------------------------------------|----------------------|
| <b>I.</b>   | Table of All Bacterial Strains from This Work .....                          | <b>Table S1; S2.</b> |
| <b>II.</b>  | Table of Antibiotic Susceptibility Testing in the Agar Diffusion Assay ..... | <b>Table S2; S3.</b> |
| <b>III.</b> | Table of Data for the Siderophore Competition Agar Diffusion Assay .....     | <b>Table S3; S4.</b> |
| <b>IV.</b>  | Experimental Procedures and Compound Characterization Data .....             | <b>S5-S9.</b>        |
| <b>V.</b>   | Copies of <sup>1</sup> H-NMR and <sup>13</sup> C-NMR Spectra .....           | <b>S10-S43.</b>      |
| <b>VI.</b>  | References .....                                                             | <b>S44.</b>          |

---

\*To whom correspondence should be addressed. M.J.M: phone, (574) 631-7571; fax, (574) 631-6652; email, mmiller1@nd.edu.

## I. Table of All Bacterial Strains From This Work

| <b>Table S1.</b> Origins and markers of bacterial strains used in this work. |                                                                             |                                                |
|------------------------------------------------------------------------------|-----------------------------------------------------------------------------|------------------------------------------------|
| <b>Strain</b>                                                                | <b>Marker</b>                                                               | <b>Origin/Reference</b>                        |
| <b>Gram-positive bacteria</b>                                                |                                                                             |                                                |
| <i>Bacillus subtilis</i><br>ATCC 6633                                        | wild type                                                                   | American Type Culture Collection               |
| <i>Enterococcus faecalis</i><br>ATCC 49532                                   | wild type                                                                   | American Type Culture Collection               |
| <i>Enterococcus faecium</i><br>NCTC 7171                                     | clinical isolate                                                            | National Collection of Type Cultures           |
| <i>Micrococcus luteus</i><br>ATCC 10240                                      | wild type                                                                   | American Type Culture Collection               |
| <i>Mycobacterium vaccae</i><br>IMET 10670                                    | wild type                                                                   | Hans Knöll Institute, Jena, Germany            |
| <i>Staphylococcus aureus</i><br>SG511                                        | wild type                                                                   | Hans Knöll Institute, Jena, Germany            |
| <i>Staphylococcus epidermidis</i><br>ATCC 14990                              | wild type                                                                   | American Type Culture Collection               |
| <b>Gram-negative bacteria</b>                                                |                                                                             |                                                |
| <i>Acinetobacter baumannii</i><br>ATCC 17961                                 | wild type                                                                   | American Type Culture Collection               |
| <i>Enterobacter aerogenes</i><br>ATCC 35029                                  | wild type<br>quality control strain                                         | American Type Culture Collection               |
| <i>Escherichia coli</i><br>ATCC 25922                                        | wild type<br>MIC standard strain                                            | American Type Culture Collection               |
| <i>Escherichia coli</i><br>DC0                                               | wild type                                                                   | Richmond et al. <b>1976</b> <sup>1</sup>       |
| <i>Escherichia coli</i><br>DC2                                               | antibiotic susceptible<br>penetration mutant<br>Produces $\beta$ -lactamase | Richmond et al. <b>1976</b> <sup>1</sup>       |
| <i>Klebsiella pneumonia</i><br>ATCC 700603                                   | SHV-18<br>MIC standard strain                                               | American Type Culture Collection               |
| <i>Klebsiella pneumonia</i><br>ATCC 8308                                     | wild type                                                                   | American Type Culture Collection               |
| <i>Pseudomonas aeruginosa</i><br>ATCC 27853                                  | wild type<br>MIC standard strain                                            | American Type Culture Collection               |
| <i>Pseudomonas aeruginosa</i><br>KW799/WT                                    | wild Type                                                                   | Zimmermann <b>1980</b> <sup>2</sup>            |
| <i>Pseudomonas aeruginosa</i><br>KW799/61                                    | antibiotic susceptible<br>penetration mutant                                | Zimmermann <b>1980</b> <sup>2</sup>            |
| <i>Salmonella typhimurium</i><br>ATCC 13311                                  | wild type                                                                   | American Type Culture Collection               |
| <i>Salmonella typhimurium</i><br>enb7                                        | ent-, mutant dependent<br>on siderophores for<br>growth on low-Fe media     | J. B. Nielands, Univ. of Cal.<br>Berkeley, USA |

## II. Table of Antibiotic Susceptibility Testing in the Agar Diffusion Assay

**Table S2.** Diameter of growth inhibition zone (mm) in the agar diffusion antibiotic susceptibility assay.<sup>a,b,c</sup>

| Test Organism                       | Test Compound            |             |             |             |                          |             |                 |             |             |             |                  |               |                    |               |               |               |                |                |                |                |
|-------------------------------------|--------------------------|-------------|-------------|-------------|--------------------------|-------------|-----------------|-------------|-------------|-------------|------------------|---------------|--------------------|---------------|---------------|---------------|----------------|----------------|----------------|----------------|
|                                     | 1a                       | 2a          | 3a          | 3a-Fe       | 1b                       | 2b          | 3b              | 1c          | 2c          | 3c          | Lor <sup>d</sup> |               | Cipro <sup>e</sup> |               |               |               |                |                |                |                |
|                                     | 2 mM<br>-Fe <sup>f</sup> | 2 mM<br>-Fe | 2 mM<br>-Fe | 2 mM<br>-Fe | 1 mM<br>+Fe <sup>g</sup> | 1 mM<br>-Fe | 1 mM<br>+Fe     | 1 mM<br>-Fe | 1 mM<br>+Fe | 1 mM<br>-Fe | 0.5 mM<br>+Fe    | 0.5 mM<br>-Fe | 0.5 mM<br>+Fe      | 0.5 mM<br>-Fe | 0.5 mM<br>+Fe | 0.5 mM<br>-Fe | 0.1 mM<br>+Fe  | 0.1 mM<br>-Fe  | 5 µg/mL<br>+Fe | 5 µg/mL<br>-Fe |
| <i>S. aureus</i><br>SG511           | 0                        | 0           | 0           | 0           | 27.8<br>(7)              | 27.5<br>(6) | 21.2<br>(9)     | 22.8<br>(4) | 20.5<br>(3) | 21.5<br>(3) | 14.7<br>(2)      | 18.6<br>(3)   | 11.6<br>(7)        | 17.9<br>(4)   | 26.5<br>(6)   | 29.5<br>(2)   | 25.8<br>(6)    | 25.7<br>(3)    | 23.3<br>(1)    | 23.4<br>(3)    |
| <i>S. epidermidis</i><br>ATCC 14990 | 0                        | 0           | 0           | 0           | 27                       | 27          | nt <sup>h</sup> | nt          | 15          | 17          | 18.5             | 21            | nt                 | 12            | 12            | 19            | 22             | 21.5           | 27             | 27             |
| <i>E. faecalis</i><br>ATCC 49532    | 0                        | 0           | 0           | 0           | 0                        | 0           | nt              | nt          | 0           | 0           | 12*              | 13*           | nt                 | 12*           | 0             | 0             | 0              | 0              | 15             | 16             |
| <i>M. luteus</i><br>ATCC 10240      | 0                        | 0           | 0           | 0           | 37                       | 42          | nt              | nt          | 11*         | 22          | 0                | 0             | nt                 | 0             | 0             | 0             | 39             | 40             | 0              | 0              |
| <i>B. subtilis</i><br>ATCC 6633     | 0                        | 0           | 0           | 0           | 23                       | 25          | nt              | nt          | 12          | 17          | 22               | 22            | nt                 | 17            | 12            | 15            | 34             | 34             | 34             | 34.5           |
| <i>M. vaccae</i><br>IMET 10670      | 0                        | 0           | 0           | 0           | nt                       | nt          | nt              | nt          | nt          | nt          | nt               | 25            | nt                 | 0             | nt            | 17*           | nt             | nt             | nt             | 38             |
| <i>A. baumannii</i><br>ATCC 17961   | 0                        | 0           | 0           | 0           | 0                        | 0           | 12.4<br>(5)     | 15.9<br>(5) | 0           | 10.5<br>(1) | 0                | 0             | 0                  | 0             | 0             | 0             | 0 <sup>i</sup> | 0 <sup>i</sup> | 21.4<br>(2)    | 21.1<br>(3)    |
| <i>E. coli</i><br>DC0               | 0                        | 0           | 20*         | 0           | 13*                      | 13*         | nt              | nt          | 0           | 13*         | 0                | 12*           | nt                 | nt            | 0             | 12*           | 21             | 21             | 21             | 21             |
| <i>E. coli</i><br>DC2               | 0                        | 0           | 19*         | 0           | 18                       | 20          | nt              | nt          | 11*         | 15*         | 13               | 15*           | nt                 | nt            | 0             | 14*           | 20             | 20             | 26             | 26             |
| <i>P. aeruginosa</i><br>799/WT      | 0                        | 0           | 0           | 0           | 0                        | 10*         | nt              | nt          | 0           | 0           | 0                | 10*           | nt                 | 0             | 0             | 10*           | 0              | 0              | 25             | 26             |
| <i>P. aeruginosa</i><br>799/61      | 0                        | 0           | 0           | 0           | 18*                      | 18*         | nt              | nt          | 19*         | 23*         | 15*              | 15*           | nt                 | 0             | 0             | 11*           | 15*            | 14*            | 28             | 29             |
| <i>K. pneumonia</i><br>ATCC 8308    | 0                        | 0           | 0           | 0           | 13*                      | 12*         | nt              | nt          | 0           | 11*         | 15*              | 15*           | nt                 | nt            | 12*           | 14*           | 21.5           | 22             | 24.5           | 26             |
| <i>S. typhimurium</i><br>ATCC 13311 | 0                        | 0           | 0           | 0           | 21                       | 20          | nt              | nt          | 13          | 14          | 22               | 24            | nt                 | nt            | 19            | 20            | 23.5           | 23             | 32             | 33             |
| <i>S. typhimurium</i><br>enb7       | 0                        | 0           | 0           | 0           | 14                       | 18          | nt              | nt          | 12*         | 17*         | 15.5             | 17            | nt                 | 16            | 14            | 23.5          | 22             | 22             | 29             | 30             |

<sup>a</sup>Exactly 50 µL of each compound solution (dissolved in 10:1 MeOH:DMSO at concentrations provided in table) were added to 9 mm wells in agar media (MHII) inoculated with  $\sim 5 \times 10^3$  CFU/mL. Diameters of growth inhibition zones were measured (mm) with an electronic caliper after incubation at 37 °C for 24 h.<sup>3</sup>

<sup>b</sup>Compounds with a standard deviation (shown in parentheses for the last significant digit) were tested in triplicate; otherwise, compounds were tested in a single trial. <sup>c</sup>Data in this table was used to generate the bar graphs shown in Figures 6 and 7 in the main text. <sup>d</sup>Lor: Lorabid<sup>®</sup> was used as a standard at 0.1 mM in H<sub>2</sub>O or at concentration indicated for specific strains. <sup>e</sup>Cipro: ciprofloxacin was used as a standard at 5 µg/mL in H<sub>2</sub>O. <sup>f</sup>-Fe: Mueller-Hinton agar No. 2 + 100 µM 2,2'-bipyridine. <sup>g</sup>+Fe: Mueller-Hinton agar No. 2 + 100 µM FeCl<sub>3</sub>. <sup>h</sup>nt: not tested. <sup>i</sup>Lorabid<sup>®</sup> used at 1.0 mM. \*Indicates a partially unclear inhibition zone.

### III. Table of Data for the Siderophore Competition Agar Diffusion Assay

| <b>Table S3.</b> Diameter of growth inhibition in the agar diffusion antibiotic susceptibility assay. <sup>a,b,c</sup> |                         |                                    |                                           |
|------------------------------------------------------------------------------------------------------------------------|-------------------------|------------------------------------|-------------------------------------------|
| <b>Compound</b>                                                                                                        | <b>Con.<sup>d</sup></b> | <b>Test Organism</b>               |                                           |
|                                                                                                                        |                         | <i>Staphylococcus aureus</i> SG511 | <i>Acinetobacter baumannii</i> ATCC 17961 |
|                                                                                                                        |                         | MHII – Fe <sup>e</sup>             | MHII – Fe                                 |
| <b>1b + 1a</b>                                                                                                         | 1 mM                    | 25.9(4)                            | 0                                         |
| <b>1b + DFO-B</b>                                                                                                      | 1 mM                    | 26.8(9)                            | nt <sup>f</sup>                           |
| <b>2b + 2a</b>                                                                                                         | 1 mM                    | 22.9(7)                            | 12.2(2)                                   |
| <b>2b + DFO-B</b>                                                                                                      | 1 mM                    | 24.1(5)                            | nt                                        |
| <b>3b + 3a</b>                                                                                                         | 1 mM                    | 22.5(8)                            | 12.5(4)                                   |
| <b>3b + 3a-Fe</b>                                                                                                      | 1 mM                    | 21.1(6)                            | 12.2(3)                                   |
| <b>3b + DFO-B</b>                                                                                                      | 1 mM                    | 19.6(5)                            | nt                                        |
| <b>1c + 1a</b>                                                                                                         | 0.5 mM                  | 15.3(5)                            | nt                                        |
| <b>1c + DFO-B</b>                                                                                                      | 0.5 mM                  | 16.4(2)                            | nt                                        |
| <b>2c + 2a</b>                                                                                                         | 0.5 mM                  | 13.3(2)                            | nt                                        |
| <b>2c + DFO-B</b>                                                                                                      | 0.5 mM                  | 11.7(2)                            | nt                                        |
| <b>3c + 3a</b>                                                                                                         | 0.5 mM                  | 23.1(5)                            | nt                                        |
| <b>3c + 3a-Fe</b>                                                                                                      | 0.5 mM                  | 21.6(9)                            | nt                                        |
| <b>3c + DFO-B</b>                                                                                                      | 0.5 mM                  | 0                                  | nt                                        |
| <b>3c + FO-B</b>                                                                                                       | 0.5 mM                  | 0                                  | nt                                        |

<sup>a</sup>Exactly 50  $\mu$ L of each compound solution (dissolved in 10:1 MeOH:DMSO at concentrations provided in table) were added to 9 mm wells in agar media (MHII) inoculated with  $\sim 5 \times 10^3$  CFU/mL. Diameters of growth inhibition zones were measured (mm) with an electronic caliper after incubation at 37 °C for 24 h.<sup>3</sup> <sup>b</sup>Compounds with a standard deviation shown in parentheses were tested in triplicate; otherwise, compounds were tested in a single trial. <sup>c</sup>Data in this table was used to generate the bar graphs shown in Figures 6 and 7 in the main text. <sup>d</sup>Con.: all compound mixtures were tested as 1:1 molar mixtures both at the concentrations indicated. <sup>e</sup>MHII-Fe: Mueller-Hinton agar No. 2 + 100  $\mu$ M 2,2'-bipyridine. <sup>f</sup>nt: not tested. \*Indicates a partially unclear inhibition zone.

#### IV. Experimental Procedures and Compound Characterization Data

*N*-Boc-*O*-PNB-Lorabid<sup>®</sup> (**7**) was a gift from Eli Lilly and Company. Compounds **4-6**, **3a**, and **3a-Fe** were synthesized by previously reported methods.<sup>4,5</sup> The experimental procedures for the syntheses of compounds **3a**, **3a-Fe**, **3b**, **3c**, **8**, **10**, **15**, and **16** are provided in the main text.

**Monohydroxamate siderophore (1a).** bis-*O*-Benzyl-monohydroxamate **4** (105.0 mg, 0.26 mmol) was dissolved in 5 mL of MeOH in an HCl-washed, 10 mL round bottom flask sealed under argon. The flask was charged with 10% Pd-C (15.0 mg) and exposed to a balloon of hydrogen gas (~1 atm). Reaction progress was monitored by RP-C18 TLC (1.5:1 CH<sub>3</sub>CN:H<sub>2</sub>O; FeCl<sub>3</sub> stain) and after 6 h there was no remaining starting material (**4**). The flask was flushed with argon and the mixture was diluted with MeOH (10 mL), vacuum filtered through celite, and concentrated under reduced pressure. This gave the desired product (**1a**) in 88% yield as a tan semi-solid (50.6 mg, 0.23 mmol) with no need for purification. <sup>1</sup>H-NMR (600 MHz, CD<sub>3</sub>OD) δ 3.60 (t, *J* = 6.9 Hz, 2 H), 3.55 (t, *J* = 6.6 Hz, 2 H), 2.75 (t, *J* = 6.9 Hz, 2 H), 2.56 (t, *J* = 6.9 Hz, 2 H), 1.64 (quin, *J* = 7.3 Hz, 2 H), 1.59–1.52 (m, 2 H), 1.40–1.33 (m, 2 H); <sup>13</sup>C-NMR (150 MHz, CD<sub>3</sub>OD) δ 177.0, 174.5, 62.9, 49.1, 33.4, 29.9, 28.6, 27.6, 24.1; HRMS-ESI (*m/z*): [M+H]<sup>+</sup> calcd. for C<sub>9</sub>H<sub>18</sub>NO<sub>5</sub>: 220.1179, found 220.1172.

**Bishydroxamate siderophore (2a).** tris-*O*-Benzyl-monohydroxamate **5** (90.6 mg, 0.13 mmol) was dissolved in 8 mL of MeOH in an HCl-washed, 25 mL round bottom flask sealed under argon. The flask was charged with 10% Pd-C (19.0 mg) and exposed to a balloon of hydrogen gas (~1 atm). Reaction progress was monitored by RP-C18 TLC (1.5:1 CH<sub>3</sub>CN:H<sub>2</sub>O; FeCl<sub>3</sub> stain) and after 4.5 h there was no remaining starting material (**5**). The flask was flushed with argon and the mixture was diluted with MeOH (10 mL), vacuum filtered through celite, and concentrated under reduced pressure. The crude product was recrystallized from MeOH/Et<sub>2</sub>O at -20 °C to give the desired product (**2a**) in 90% yield as a white powder (49.2 mg, 0.12 mmol). Mp 81–83 °C; <sup>1</sup>H-NMR (600 MHz, CD<sub>3</sub>OD) δ 3.64–3.57 (m, 4 H), 3.55 (t, *J* = 6.5 Hz, 2 H), 3.16 (t, *J* = 6.6 Hz, 2 H), 2.80–2.72 (m, 4 H), 2.56 (t, *J* = 6.6 Hz, 2 H), 2.45 (t, *J* = 7.0 Hz, 2 H), 1.68–1.60 (m, 4 H), 1.59–1.48 (m, 4 H), 1.43–1.28 (m, 4 H); <sup>13</sup>C-NMR (150 MHz, CD<sub>3</sub>OD) δ 177.0, 175.1, 174.6, 62.9, 49.0, 40.4, 33.4, 31.6, 30.1, 30.0, 29.1, 28.6, 27.7, 27.5, 25.0, 24.1; HRMS-ESI (*m/z*): [M+H]<sup>+</sup> calcd. for C<sub>18</sub>H<sub>34</sub>N<sub>3</sub>O<sub>8</sub>: 420.2340, found 420.2354.

**bis-*O*-Benzyl-monohydroxamate-*O*-PNB-Lorabid<sup>®</sup> conjugate (11).** *O*-PNB-Lorabid<sup>®</sup> TFA salt (**8**; 87.5 mg, 0.15 mmol) was dissolved in 10 mL of anhydrous CH<sub>2</sub>Cl<sub>2</sub> and *i*Pr<sub>2</sub>EtN (0.1 mL, 0.57 mmol) was added slowly until the solution was basic (pH paper). Bis-*O*-Benzyl-monohydroxamate **4** (59.0 mg, 0.15 mmol), DMAP (5.0 mg, 0.04 mmol), and EDC-HCl (60.0 mg, 0.31 mmol) were then added, respectively. After 18 h at rt, TLC (6% MeOH in CH<sub>2</sub>Cl<sub>2</sub>; FeCl<sub>3</sub> stain) showed no remaining starting material (**4**). The mixture was diluted with CH<sub>2</sub>Cl<sub>2</sub> (10 mL), washed with saturated aqueous NaHCO<sub>3</sub> (10 mL) and brine (10 mL), dried over anhydrous MgSO<sub>4</sub>, filtered, and concentrated. The crude product was purified by silica gel column chromatography (0.5 x 5 in silica gel; 3% MeOH in CH<sub>2</sub>Cl<sub>2</sub>) to give the desired product (**11**) in 73% yield as a colorless, viscous oil (93.3 mg, 0.11 mmol). <sup>1</sup>H-NMR (600 MHz, CDCl<sub>3</sub>) δ 8.41 (d, *J* = 8.2 Hz, 1 H), 8.19 (d, *J* = 8.2 Hz, 2 H), 7.59 (d, *J* = 8.5 Hz, 2 H), 7.42–7.22 (m, 15 H), 6.57 (br s, 1 H), 5.50 (d, *J* = 6.2 Hz, 1 H), 5.43–5.38 (m, 2 H), 5.26 (d, *J* = 13.5 Hz, 1 H), 4.82 (d, *J* = 10.3 Hz, 1 H), 4.71 (d, *J* = 10.0 Hz, 1 H), 4.41 (s, 2 H), 3.89 (dd, *J* = 7.6, 4.1 Hz, 2

H), 3.47–3.39 (m, 2 H), 3.35–3.28 (m, 1 H), 2.93–2.81 (m, 2 H), 2.67–2.52 (m, 2 H), 2.32 (t,  $J$  = 5.1 Hz, 2 H), 1.95–1.88 (m, 1 H), 1.68–1.46 (m, 5 H), 1.34–1.28 (m, 2 H);  $^{13}\text{C}$ -NMR (150 MHz,  $\text{CDCl}_3$ )  $\delta$  173.8, 172.2, 171.0, 170.9, 164.8, 160.0, 147.7, 142.2, 138.5, 136.7, 133.9, 130.7, 129.6, 129.3, 129.1, 128.8, 128.5, 128.2, 127.9, 127.8, 127.5, 127.3, 127.1, 127.0, 123.7, 123.6, 123.2, 73.3, 72.7, 70.1, 66.2, 59.5, 59.2, 58.5, 57.8, 53.0, 52.6, 44.6, 32.0, 30.9, 30.4, 29.3, 29.2, 29.1, 28.1, 27.4, 26.5, 26.4, 23.2, 21.4, 21.3; HRMS-ESI ( $m/z$ ):  $[\text{M}+\text{H}]^+$  calcd. for  $\text{C}_{46}\text{H}_{49}\text{ClN}_5\text{O}_{10}$ : 866.3162, found 866.3193.

**Monohydroxamate-Lorabid<sup>®</sup> conjugate (1b).** bis-*O*-Benzyl-monohydroxamate-Lorabid<sup>®</sup> conjugate **11** (84.0 mg, 0.10 mmol) and concentrated HCl (42.1  $\mu\text{L}$ , 30.0 mmol) were dissolved in 1.4 mL of DMF:H<sub>2</sub>O (95:5) in an HCl-washed, 10 mL round bottom flask sealed under argon. The flask was charged with 10% Pd-C (29.4 mg) and exposed to a balloon of hydrogen gas (~1 atm). Reaction progress was monitored by RP-C18 TLC (2.5:1 H<sub>2</sub>O:CH<sub>3</sub>CN; FeCl<sub>3</sub> stain) and after 41 h there was no remaining starting material (**11**). The flask was flushed with argon and the mixture was diluted with MeOH, vacuum filtered through celite, and concentrated using high vacuum rotary evaporation (~1 mm Hg). The crude product was purified by preparative HPLC using a 150 x 20 mm YMC-Pack Proc C18 column fit with a guard column, 0.1% TFA in H<sub>2</sub>O (A) and 0.1% TFA in CH<sub>3</sub>CN (B) as mobile phases, and a flow rate of 15 mL/min. A gradient was formed from 30%-60% of B over 4 min where the desired compound (**1b**) elutes at 3 min. Pure fractions were lyophilized and the obtained solid was recrystallized from MeOH/Et<sub>2</sub>O to give the desired product (**1b**) in 38% yield as a tan solid (20.2 mg, 0.04 mmol). Mp 110–112 °C (color change), 190–195 °C (dec.);  $^1\text{H}$ -NMR (600 MHz,  $\text{CD}_3\text{OD}$ )  $\delta$  7.44–7.31 (m, 5 H), 5.44–5.42 (m, 1 H), 5.37 (d,  $J$  = 4.7 Hz, 1 H), 3.88 (dt,  $J$  = 11.5, 4.4 Hz, 1 H), 3.82 (ddd,  $J$  = 14.0, 7.3, 7.1 Hz, 1 H), 3.60–3.52 (m, 4 H), 3.30–3.25 (m, 1 H), 3.19–3.14 (m, 2 H), 2.86–2.82 (m, 2 H), 2.76 (t,  $J$  = 7.2 Hz, 2 H), 2.71–2.61 (m, 2 H), 2.60–2.51 (m, 3 H), 2.47 (t,  $J$  = 7.2 Hz, 2 H), 2.40 (dt,  $J$  = 14.9, 5.5 Hz, 1 H), 1.77–1.71 (m, 1 H), 1.67–1.47 (m, 9 H), 1.39–1.27 (m, 4 H);  $^{13}\text{C}$ -NMR (150 MHz,  $\text{CD}_3\text{OD}$ )  $\delta$  175.6, 175.1, 174.7, 174.6, 173.9, 166.3, 138.3, 130.0, 129.6, 129.4, 62.9, 59.9, 59.6, 54.1, 48.7, 40.5, 33.4, 32.5, 31.7, 31.3, 29.9, 29.0, 28.9, 27.6, 27.2, 24.8, 24.1, 23.1; HRMS-ESI ( $m/z$ ):  $[\text{M}+\text{H}]^+$  calcd. for  $\text{C}_{25}\text{H}_{32}\text{ClN}_4\text{O}_8$ : 551.1903, found 551.1889.

**bis-*O*-Benzyl-monohydroxamate-*O*-benzylciprofloxacin conjugate (12).** *O*-Benzyl-ciprofloxacin hydrochloride salt (**10**) was free-based using Amberlite IR400(OH<sup>-</sup>) resin in  $\text{CHCl}_3$  for 4 h. The resulting *O*-benzyl-ciprofloxacin amine (53.1 mg, 0.13 mmol), bis-*O*-Benzyl-monohydroxamate **4** (50.5 mg, 0.13 mmol), *i*Pr<sub>2</sub>EtN (0.05 mL, 0.29 mmol), DMAP (4.0 mg, 0.03 mmol), and EDC-HCl (36.2 mg, 0.189 mmol) were dissolved in 5 mL of anhydrous  $\text{CH}_2\text{Cl}_2$ , respectively. After 5 h at rt, TLC (6% MeOH in  $\text{CH}_2\text{Cl}_2$ ; FeCl<sub>3</sub> stain) showed no remaining starting material **4**. The mixture was diluted with  $\text{CH}_2\text{Cl}_2$  (25 mL), washed with saturated aqueous NaHCO<sub>3</sub> (30 mL) and brine (30 mL), dried over anhydrous MgSO<sub>4</sub>, filtered, and concentrated. The crude product was purified by silica gel column chromatography (0.75 x 4 in silica gel; 3% MeOH in  $\text{CH}_2\text{Cl}_2$ ) to give the desired product (**12**) in 92% yield as a clear, yellow oil (93.3 mg, 0.12 mmol).  $^1\text{H}$ -NMR (600 MHz,  $\text{CDCl}_3$ )  $\delta$  8.54 (s, 1 H), 8.09–8.06 (m, 1 H), 7.52 (d,  $J$  = 7.6 Hz, 2 H), 7.43–7.24 (m, 14 H), 5.40 (s, 2 H), 4.93 (s, 2 H), 4.48 (s, 2 H), 3.87–3.84 (m, 2 H), 3.77–3.73 (m, 2 H), 3.66 (t,  $J$  = 6.6 Hz, 2 H), 3.46 (t,  $J$  = 6.5 Hz, 2 H), 3.43–3.38 (m, 1 H), 3.31–3.27 (m, 2 H), 3.24–3.20 (m, 2 H), 2.89–2.83 (m, 2 H), 2.70 (t,  $J$  = 6.3 Hz, 2 H), 1.71–1.60 (m, 4 H), 1.42–1.36 (m, 2 H), 1.30 (q,  $J$  = 6.7 Hz, 2 H), 1.14–1.10 (m, 2 H);  $^{13}\text{C}$ -NMR (150 MHz,  $\text{CDCl}_3$ )  $\delta$  173.5, 173.0, 170.5, 165.5, 153.3 (d,  $J$  = 248.5 Hz), 148.4, 144.1 (d,

$J = 10.7$  Hz), 138.5, 137.9, 136.4, 129.1, 128.8, 128.7, 128.5, 128.3, 128.0, 127.9, 127.6, 127.5, 123.5 (d,  $J_{C-F} = 7.3$  Hz), 113.5 (d,  $J_{C-F} = 23.6$  Hz), 110.2, 105.1, 76.3, 72.8, 70.1, 66.4, 50.2, 49.7, 45.5, 41.5, 34.5, 29.4, 27.5, 27.3, 26.7, 23.4, 8.2; HRMS-ESI ( $m/z$ ):  $[M+H]^+$  calcd. for  $C_{47}H_{52}FN_4O_7$ : 803.3815, found 803.3825.

**Monohydroxamate-ciprofloxacin conjugate (1c).** bis-*O*-Benzyl-monohydroxamate-*O*-benzylciprofloxacin conjugate (**12**; 75.0 mg, 0.09 mmol) was dissolved in 8 mL of MeOH in an HCl-washed, 25 mL rb flask sealed under argon. The flask was charged with 10% Pd-C (15.0 mg) and exposed to a balloon of hydrogen gas (~1 atm). Reaction progress was monitored by RP-C18 TLC (1.5:1  $CH_3CN:H_2O$ ;  $FeCl_3$  stain) and after 12 h there was no remaining starting material (**12**). The flask was flushed with argon and the mixture was diluted with MeOH, vacuum filtered through celite, and concentrated under reduced pressure. The resulting solid was dissolved in a minimal amount of MeOH and precipitated by addition of cold  $Et_2O$ . After trituration with  $Et_2O$  the desired product (**1c**) was obtained in 70% yield as a light tan solid (35.0 mg, 0.065 mmol). Mp 180–185 °C (dec.);  $^1H$ -NMR (600 MHz,  $CD_3OD$ )  $\delta$  8.71 (s, 1 H), 7.84 (d,  $J = 13.2$  Hz, 1 H), 7.55 (br s, 1 H), 3.88–3.78 (m, 4 H), 3.74 (br s, 1 H), 3.61 (t,  $J = 6.9$  Hz, 2 H), 3.55 (t,  $J = 6.5$  Hz, 2 H), 3.47–3.40 (m, 2 H), 3.40–3.33 (m, 2 H), 2.83 (t,  $J = 5.9$  Hz, 2 H), 2.73 (t,  $J = 6.2$  Hz, 2 H), 1.65 (dt,  $J = 14.4, 7.2$  Hz, 2 H), 1.59–1.53 (m, 2 H), 1.43–1.34 (m, 4 H), 1.24–1.18 (m, 2 H);  $^{13}C$ -NMR (150 MHz,  $CD_3OD$ )  $\delta$  178.2, 174.7, 173.2, 170.0, 155.1 (d,  $J_{C-F} = 249.6$  Hz), 149.3, 146.8 (d,  $J_{C-F} = 10.7$  Hz), 140.8, 121.3, 112.7 (d,  $J_{C-F} = 23.0$  Hz), 107.5, 62.9, 51.2, 50.7, 46.6, 42.9, 37.0, 33.4, 28.7, 28.6, 27.7, 24.1, 8.7; HRMS-ESI ( $m/z$ ):  $[M+H]^+$  calcd. for  $C_{26}H_{34}FN_4O_7$ : 533.2406, found 533.2415.

**tris-*O*-Benzyl-bishydroxamate-*O*-PNB-Lorabid® conjugate (13).** *O*-PNB-Lorabid® TFA salt (**8**; 87.9 mg, 0.15 mmol) was dissolved in 15 mL of anhydrous  $CH_2Cl_2$  and  $iPr_2EtN$  (0.13 mL, 0.75 mmol) was added slowly until the solution was basic (pH paper). Tris-*O*-Benzyl-bishydroxamate **5** (103.6 mg, 0.15 mmol), DMAP (5.0 mg, 0.04 mmol), and EDC-HCl (65.0 mg, 0.34 mmol) were then added, respectively. After 16 h at rt, TLC (6% MeOH in  $CH_2Cl_2$ ;  $FeCl_3$  stain) showed no remaining starting material (**5**). The mixture was diluted with  $CH_2Cl_2$  (10 mL), washed with saturated aqueous  $NaHCO_3$  (10 mL), 10% aqueous citric acid (10 mL), and brine (10 mL), dried over anhydrous  $MgSO_4$ , filtered, and concentrated. The crude product was purified by silica gel column chromatography (1 x 4 in silica gel; 3% MeOH in  $CH_2Cl_2$ ) to give the desired product (**13**) in 66% yield as a colorless, viscous oil (114.7 mg, 0.10 mmol).  $^1H$ -NMR (600 MHz,  $CDCl_3$ )  $\delta$  8.58 (d,  $J = 7.3$  Hz, 1 H), 8.22 (d,  $J = 8.5$  Hz, 2 H), 7.72 (d,  $J = 6.7$  Hz, 1 H), 7.61 (d,  $J = 8.5$  Hz, 2 H), 7.45–7.21 (m, 20 H), 6.58 (br s, 1 H), 5.60 (d,  $J = 6.5$  Hz, 1 H), 5.46–5.39 (m, 2 H), 5.30 (d,  $J = 13.2$  Hz, 1 H), 4.88–4.79 (m, 3 H), 4.76 (d,  $J = 10.0$  Hz, 1 H), 4.47 (s, 2 H), 4.04–3.96 (m, 1 H), 3.90 (dd,  $J = 11.0, 4.5$  Hz, 1 H), 3.41 (t,  $J = 6.6$  Hz, 2 H), 3.40–3.29 (m, 2 H), 3.22 (dt,  $J = 14.0, 5.0$  Hz, 1 H), 2.96–2.80 (m, 3 H), 2.77–2.68 (m, 1 H), 2.68–2.37 (m, 6 H), 1.95–1.88 (m, 1 H), 1.82–1.75 (m, 2 H), 1.74–1.45 (m, 6 H), 1.44–1.33 (m, 3 H), 1.31–1.20 (m, 3 H), 1.19–1.09 (m, 1 H);  $^{13}C$ -NMR (150 MHz,  $CDCl_3$ )  $\delta$  174.4, 173.9, 172.5, 171.9, 171.5, 165.3, 160.0, 147.8, 142.0, 138.5, 136.7, 134.2, 134.0, 131.0, 129.2, 129.1, 129.0, 128.9, 128.8, 128.7, 128.6, 128.5, 128.4, 128.3, 127.8, 127.6, 127.5, 123.7, 76.3, 76.1, 72.8, 70.1, 66.2, 58.9, 57.9, 52.9, 45.4, 43.5, 39.2, 32.0, 30.4, 30.1, 29.3, 27.8, 27.6, 27.5, 26.5, 25.6, 23.3, 23.2, 21.9, 21.3; HRMS-ESI ( $m/z$ ):  $[M+H]^+$  calcd. for  $C_{62}H_{71}ClN_7O_{13}$ : 1156.4793, found 1156.4778.

**Bishydroxamate-Lorabid<sup>®</sup> conjugate (2b).** tris-*O*-Benzyl-bishydroxamate-Lorabid<sup>®</sup> conjugate **13** (103.0 mg, 0.09 mmol) and concentrated HCl (38.6  $\mu$ L, 27.0 mmol) were dissolved in 1.3 mL of DMF:H<sub>2</sub>O (95:5) in an HCl-washed, 10 mL round bottom flask sealed under argon. The flask was charged with 10% Pd-C (27.0 mg) and exposed to a balloon of hydrogen gas (~1 atm). Reaction progress was monitored by RP-C18 TLC (2.5:1 H<sub>2</sub>O:CH<sub>3</sub>CN; FeCl<sub>3</sub> stain) and after 24 h there was no remaining starting material (**13**). The flask was flushed with argon and the mixture was diluted with MeOH, vacuum filtered through celite, and concentrated using high vacuum rotary evaporation (~1 mm Hg). The crude product was purified by preparative HPLC using a 150 x 20 mm YMC-Pack Proc C18 column fit with a guard column, 0.1% TFA in H<sub>2</sub>O (A) and 0.1% TFA in CH<sub>3</sub>CN (B) as mobile phases, and a flow rate of 15 mL/min. A gradient was formed from 30%-60% of B over 4 min. Fractions containing pure compound **2b** were lyophilized and the obtained solid was recrystallized from MeOH/Et<sub>2</sub>O to give the desired product (**2b**) in 42% yield as an off-white solid (26.0 mg, 0.035 mmol). Mp 96–98 °C (color change), 160–165 °C (dec.); <sup>1</sup>H-NMR (600 MHz, CD<sub>3</sub>OD)  $\delta$  7.44–7.31 (m, 5 H), 5.44–5.42 (m, 1 H), 5.37 (d, *J* = 4.7 Hz, 1 H), 3.88 (dt, *J* = 11.5, 4.4 Hz, 1 H), 3.82 (ddd, *J* = 14.0, 7.3, 7.1 Hz, 1 H), 3.60–3.52 (m, 4 H), 3.30–3.25 (m, 1 H), 3.19–3.14 (m, 2 H), 2.86–2.82 (m, 2 H), 2.76 (t, *J* = 7.2 Hz, 2 H), 2.71–2.61 (m, 2 H), 2.60–2.51 (m, 3 H), 2.47 (t, *J* = 7.2 Hz, 2 H), 2.40 (dt, *J* = 14.9, 5.5 Hz, 1 H), 1.77–1.71 (m, 1 H), 1.67–1.47 (m, 9 H), 1.39–1.27 (m, 4 H); <sup>13</sup>C-NMR (150 MHz, CD<sub>3</sub>OD)  $\delta$  175.6, 175.0, 174.7, 174.6, 173.9, 166.3, 138.3, 130.0, 129.6, 129.4, 62.9, 59.9, 59.6, 54.1, 48.7, 40.5, 33.4, 32.5, 31.7, 31.3, 29.9, 29.0, 28.9, 27.6, 27.2, 24.8, 24.1, 23.1; HRMS-ESI (*m/z*): [M+H]<sup>+</sup> calcd. for C<sub>34</sub>H<sub>48</sub>ClN<sub>6</sub>O<sub>11</sub>: 751.3064, found 751.3051.

**tris-*O*-Benzyl-bishydroxamate-*O*-benzylciprofloxacin conjugate (14).** *O*-Benzyl-ciprofloxacin hydrochloride salt (**10**; 70.0 mg, 0.15 mmol), tris-*O*-benzyl-bishydroxamate **5** (96.0 mg, 0.14 mmol), *i*Pr<sub>2</sub>EtN (0.1 mL, 0.57 mmol), DMAP (4.3 mg, 0.035 mmol), and EDC-HCl (53.3 mg, 0.28 mmol) were dissolved in 10 mL of anhydrous CH<sub>2</sub>Cl<sub>2</sub>, respectively. After 23 h at rt, TLC (6% MeOH in CH<sub>2</sub>Cl<sub>2</sub>; FeCl<sub>3</sub> stain) showed no remaining starting material **5**. The mixture was diluted with CH<sub>2</sub>Cl<sub>2</sub> (20 mL), washed with saturated aqueous NaHCO<sub>3</sub> (30 mL) and brine (30 mL), dried over anhydrous MgSO<sub>4</sub>, filtered, and concentrated. The crude product was purified by silica gel column chromatography (1 x 4 in silica gel; 3% MeOH in CH<sub>2</sub>Cl<sub>2</sub>) to give the desired product (**14**) in 66% yield as a clear, colorless oil (101.0 mg, 0.09 mmol). <sup>1</sup>H-NMR (600 MHz, CDCl<sub>3</sub>)  $\delta$  8.52 (s, 1 H), 8.09 - 8.05 (m, 1 H), 7.51 (d, *J* = 7.0 Hz, 2 H), 7.42 - 7.23 (m, 19 H), 6.25 (br s, 1 H), 5.38 (s, 2 H), 4.90 (s, 2 H), 4.83 (s, 2 H), 4.46 (s, 2 H), 3.86–3.81 (m, 2 H), 3.76–3.72 (m, 2 H), 3.69–3.63 (m, 2 H), 3.63–3.56 (m, 2 H), 3.42 (t, *J* = 6.6 Hz, 2 H), 3.41–3.36 (m, 1 H), 3.31–3.26 (m, 2 H), 3.24–3.17 (m, 4 H), 2.85–2.80 (m, 2 H), 2.80–2.74 (m, 2 H), 2.69 (t, *J* = 6.0 Hz, 2 H), 2.45 (t, *J* = 6.6 Hz, 2 H), 1.68–1.56 (m, 6 H), 1.51–1.45 (m, 2 H), 1.38–1.24 (m, 6 H), 1.11–1.07 (m, 2 H); <sup>13</sup>C-NMR (150 MHz, CDCl<sub>3</sub>)  $\delta$  173.7, 173.0, 172.2, 170.4, 165.5, 153.3 (d, *J*<sub>C-F</sub> = 248.5 Hz), 148.4, 144.1 (d, *J*<sub>C-F</sub> = 10.7 Hz), 138.5, 137.9, 136.4, 134.5, 129.5, 129.2, 129.1, 128.9, 128.7, 128.6, 128.5, 128.3, 127.9, 127.8, 127.6, 127.5, 123.5 (d, *J*<sub>C-F</sub> = 6.7 Hz), 113.5 (d, *J*<sub>C-F</sub> = 23.0 Hz), 110.2, 105.1, 76.3, 76.2, 72.8, 70.1, 66.4, 50.3, 50.2, 49.6, 49.5, 45.5, 45.2, 45.0, 41.5, 39.3, 34.5, 30.7, 29.3, 28.9, 28.2, 27.3, 27.2, 26.7, 26.4, 23.8, 23.4, 8.1; HRMS-ESI (*m/z*): [M+H]<sup>+</sup> calcd. for C<sub>63</sub>H<sub>74</sub>FN<sub>6</sub>O<sub>10</sub>: 1093.5445, found 1093.5457.

**Bishydroxamate-ciprofloxacin conjugate (2c).** tris-*O*-Benzyl-bishydroxamate-*O*-benzylciprofloxacin conjugate (**14**; 95.0 mg, 0.09 mmol) was dissolved in 8 mL of MeOH in an HCl-washed, 25 mL rb flask sealed under argon. The flask was charged with 10% Pd-C (15.0

mg) and exposed to a balloon of hydrogen gas (~1 atm). Reaction progress was monitored by RP-C18 TLC (1.5:1 CH<sub>3</sub>CN:H<sub>2</sub>O; FeCl<sub>3</sub> stain) and after 16 h there was no remaining starting material (**14**). The flask was flushed with argon and the mixture was diluted with MeOH, vacuum filtered through celite, and concentrated under reduced pressure. This gave the desired product (**2c**) in 86% yield as a light yellow solid (54.7 mg, 0.075 mmol) with no need for purification. Mp 77–79 °C (color change), 143–150 °C (dec.); <sup>1</sup>H-NMR (600 MHz, CD<sub>3</sub>OD) δ 8.73 (s, 1 H), 7.85 (d, *J* = 13.2 Hz, 1 H), 7.57 (br s, 1 H), 3.88–3.79 (m, 4 H), 3.75 (br s, 1 H), 3.61 (t, *J* = 6.9 Hz, 2 H), 3.58 (t, *J* = 6.9 Hz, 2 H), 3.54 (t, *J* = 6.5 Hz, 2 H), 3.48–3.42 (m, 2 H), 3.40–3.35 (m, 2 H), 3.17 (t, *J* = 6.7 Hz, 2 H), 2.87–2.80 (m, 2 H), 2.78–2.69 (m, 4 H), 2.45 (t, *J* = 7.0 Hz, 2 H), 1.69–1.59 (m, 4 H), 1.58–1.49 (m, 4 H), 1.44–1.39 (m, 2 H), 1.38–1.30 (m, 4 H), 1.25–1.20 (m, 2 H); <sup>13</sup>C-NMR (150 MHz, CD<sub>3</sub>OD) δ 178.2, 174.9, 174.6, 174.4, 173.1, 169.6, 155.0 (d, *J*<sub>C-F</sub> = 249.6 Hz), 149.3, 146.8 (d, *J*<sub>C-F</sub> = 9.5 Hz), 140.7, 120.9 (d, *J*<sub>C-F</sub> = 8.4 Hz), 112.5 (d, *J*<sub>C-F</sub> = 23.0 Hz), 107.4, 62.8, 51.0, 50.6, 46.4, 42.7, 40.3, 36.9, 33.3, 31.5, 29.9, 28.9, 28.5, 28.4, 27.5, 27.3, 24.9, 24.0, 8.6; HRMS-ESI (*m/z*): [M+H]<sup>+</sup> calcd. for C<sub>35</sub>H<sub>50</sub>FN<sub>6</sub>O<sub>10</sub>: 733.3567, found 733.3562.

V. Copies of  $^1\text{H}$ -NMR and  $^{13}\text{C}$ -NMR Spectra

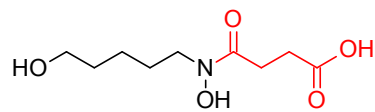

**1a**

$^1\text{H}$ -NMR (600 MHz,  $\text{CD}_3\text{OD}$ )

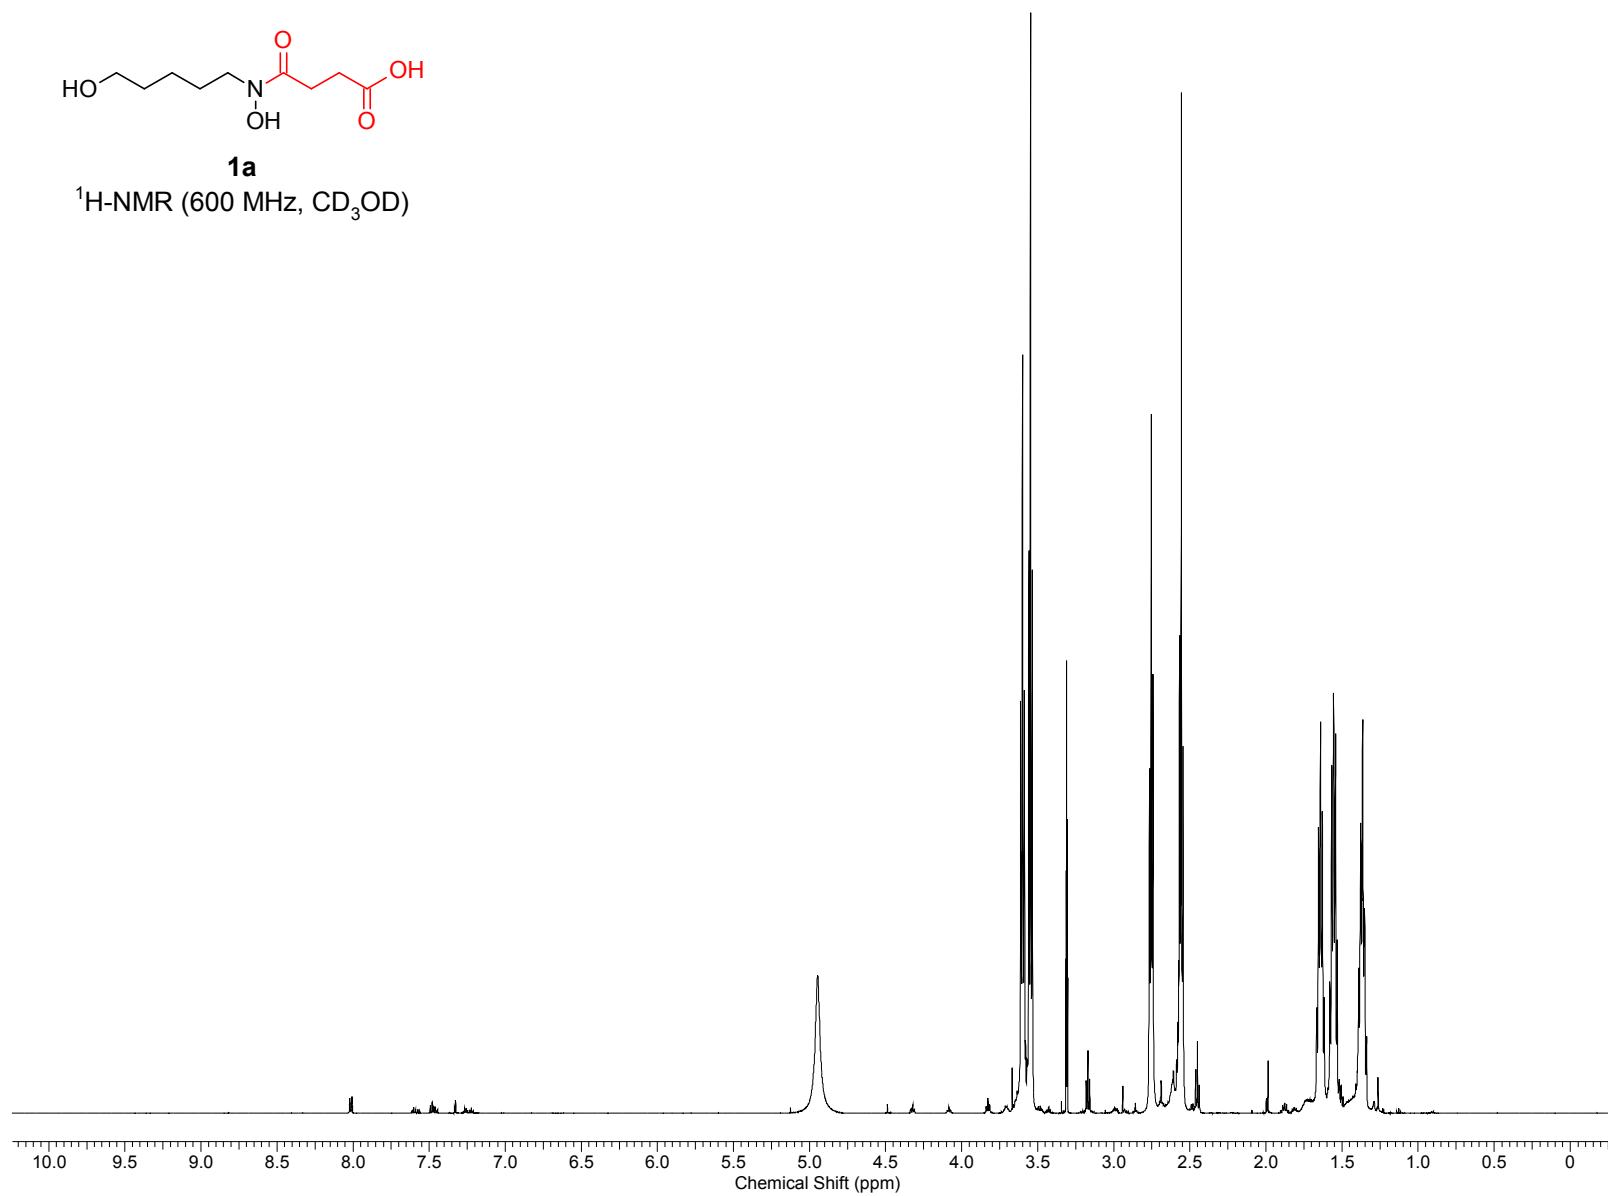

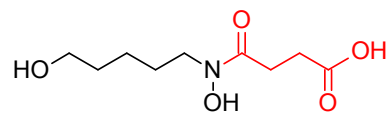

**1a**

$^{13}\text{C}$ -NMR (150 MHz,  $\text{CD}_3\text{OD}$ )

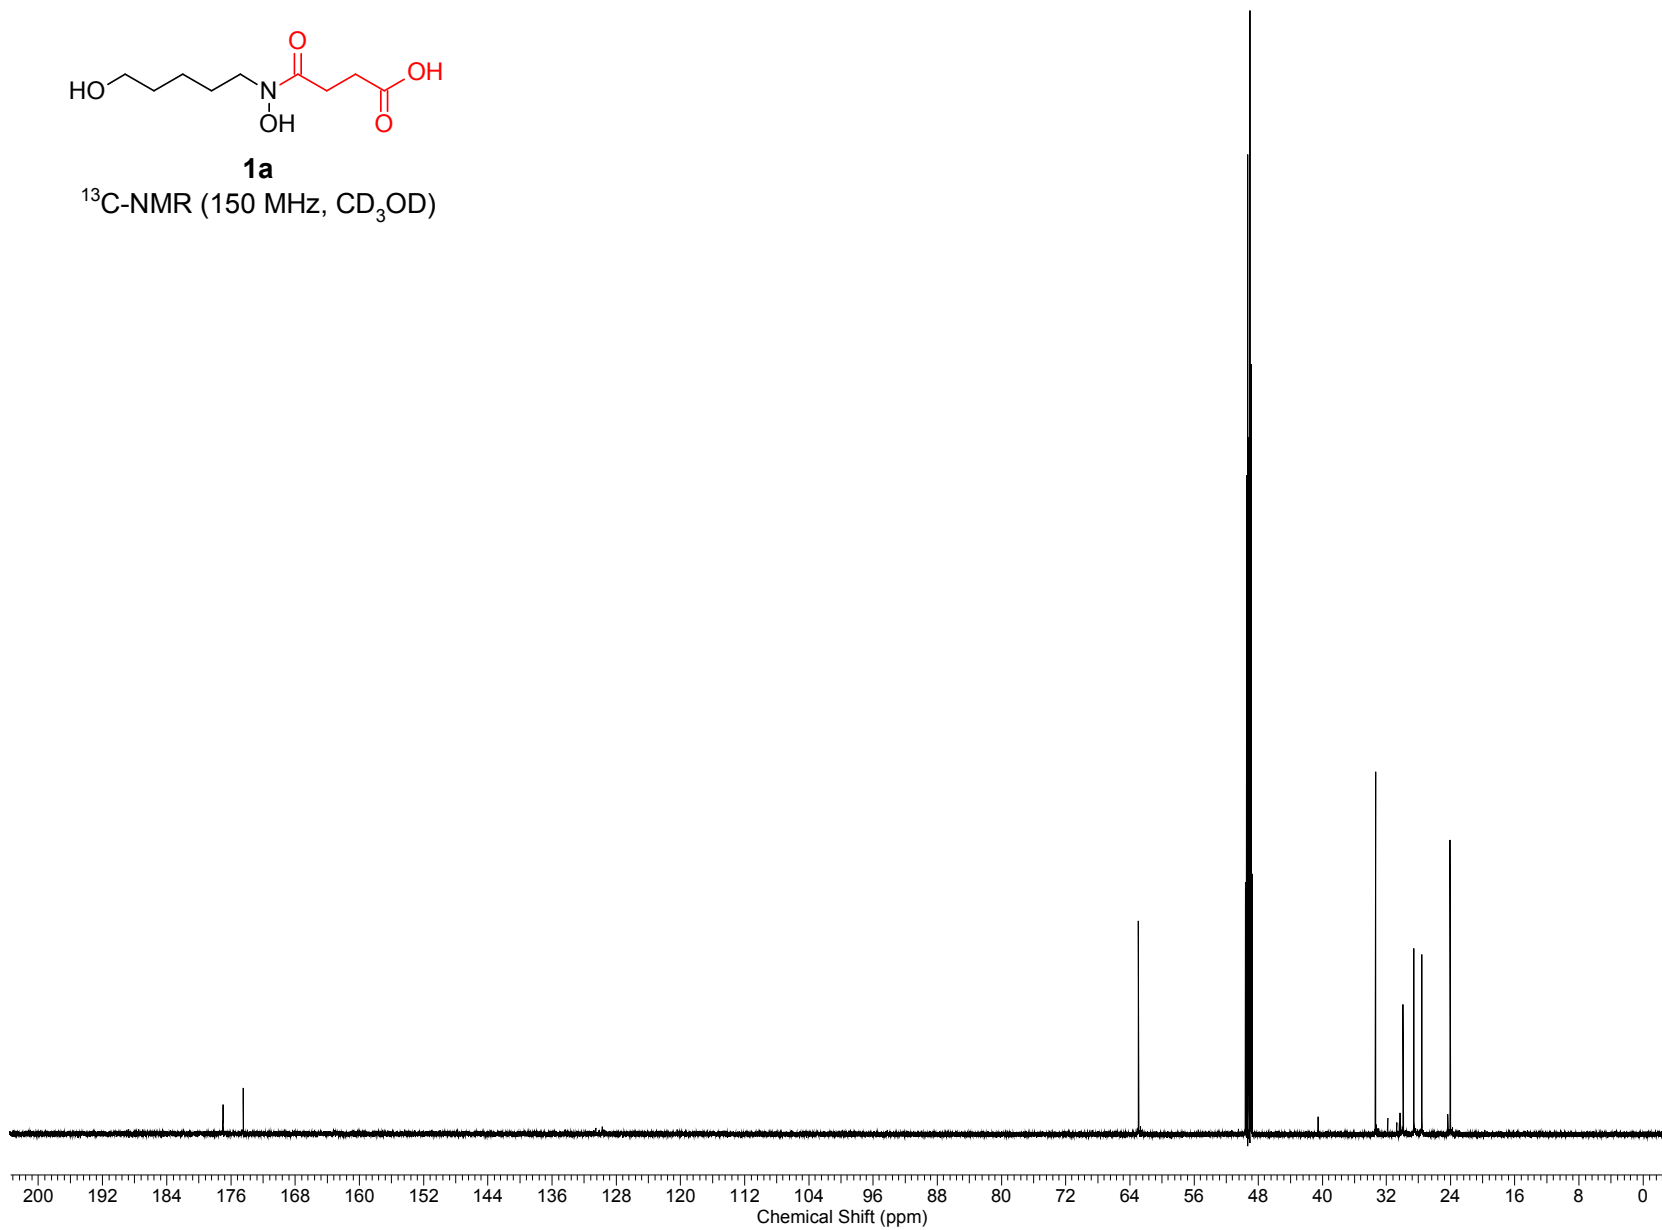

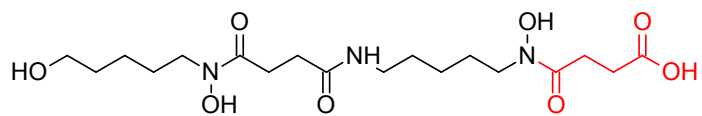

**2a**

$^1\text{H}$ -NMR (600 MHz,  $\text{CD}_3\text{OD}$ )

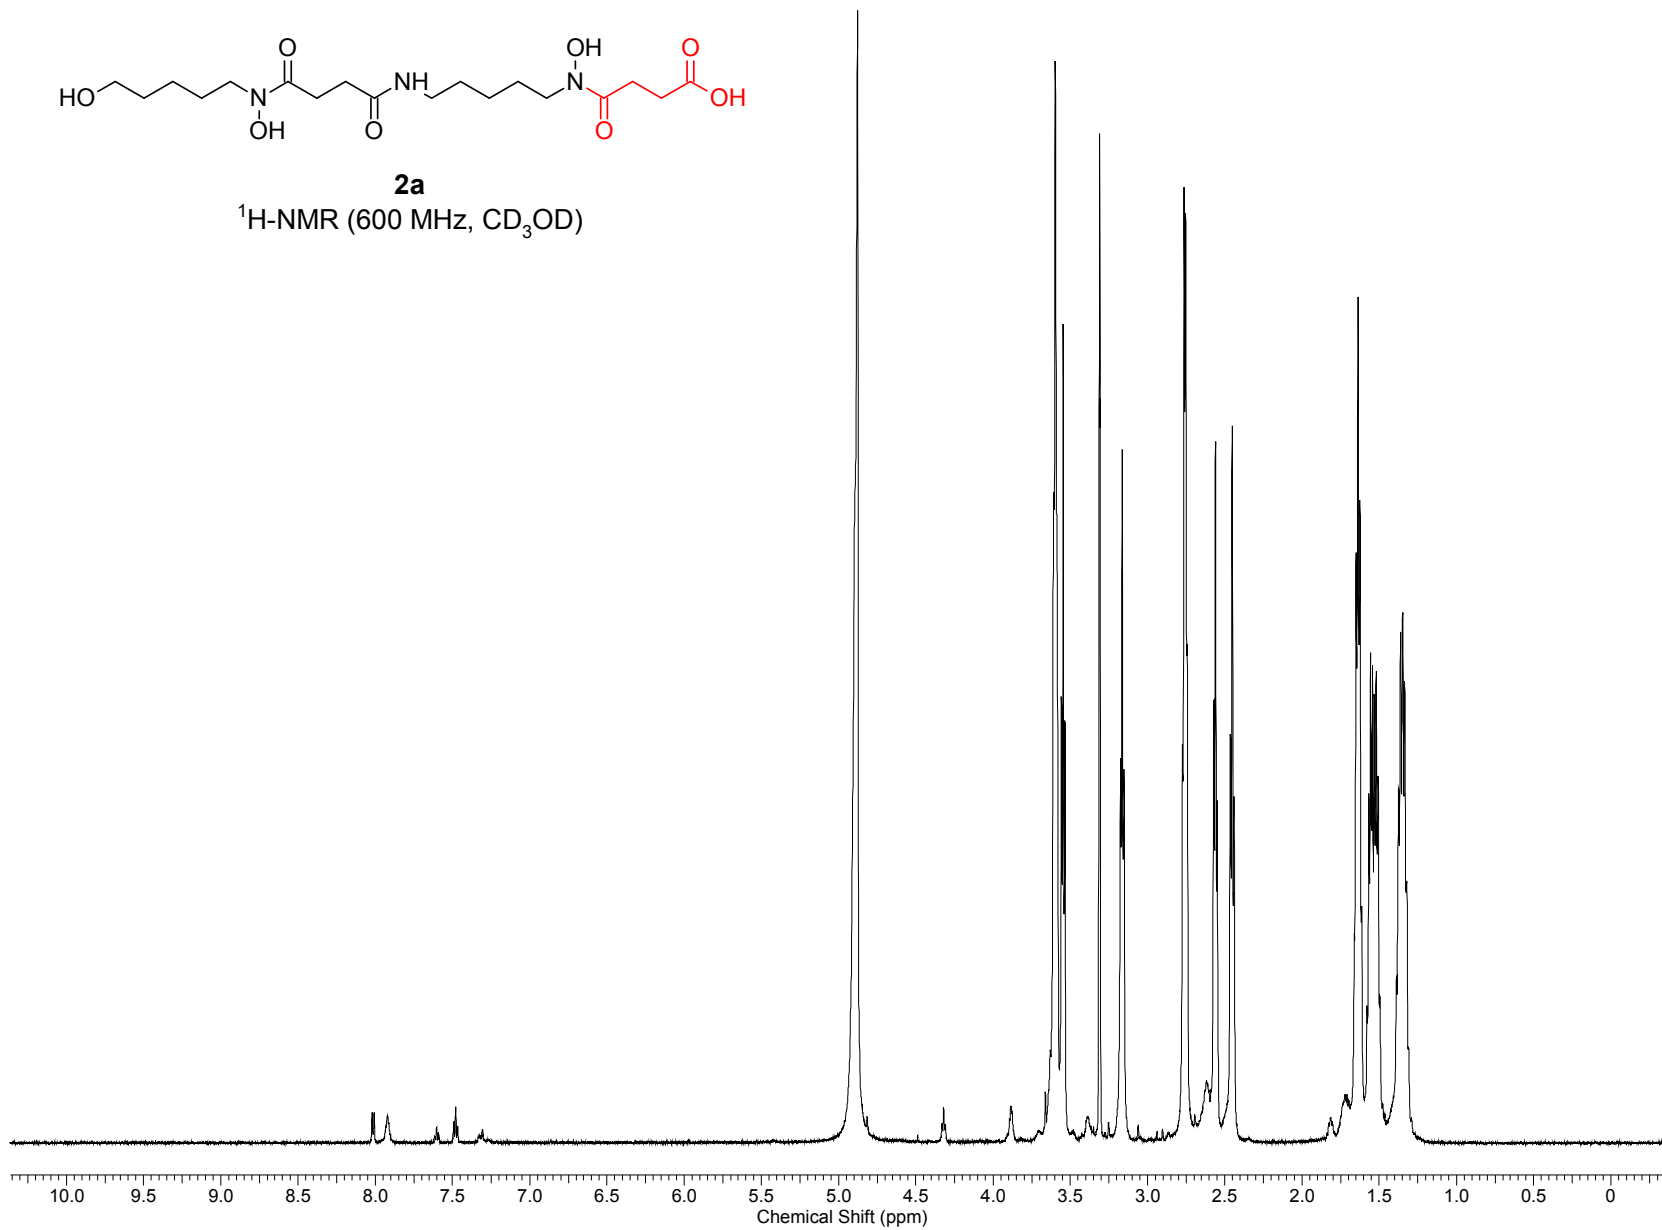

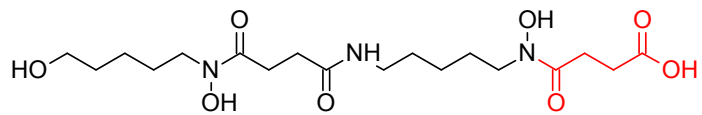

**2a**

$^{13}\text{C}$ -NMR (150 MHz,  $\text{CD}_3\text{OD}$ )

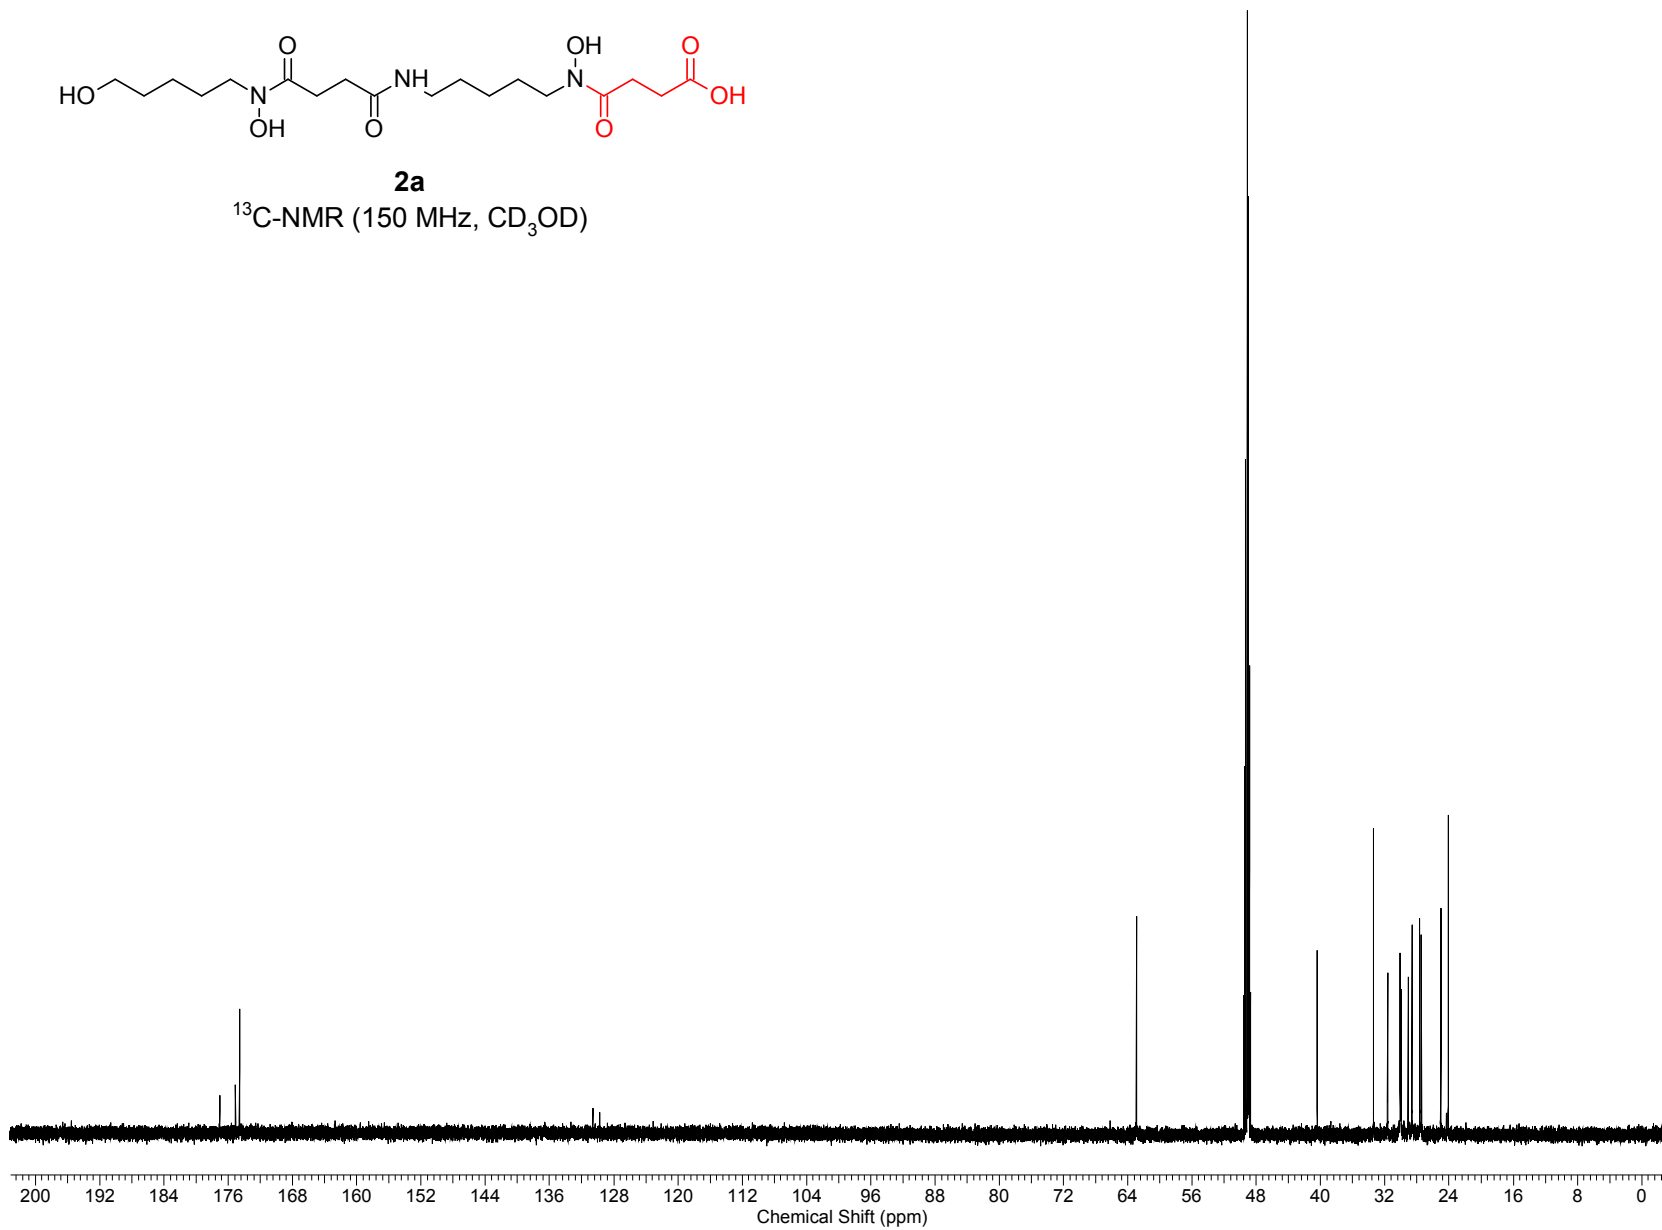

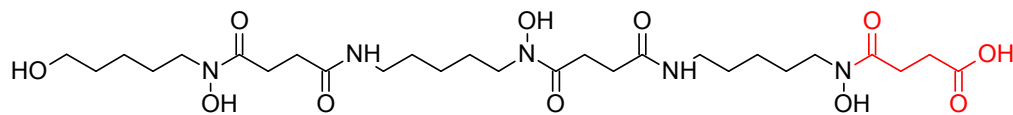

**3a**

<sup>1</sup>H-NMR (600 MHz, DMSO-*d*<sub>6</sub>)

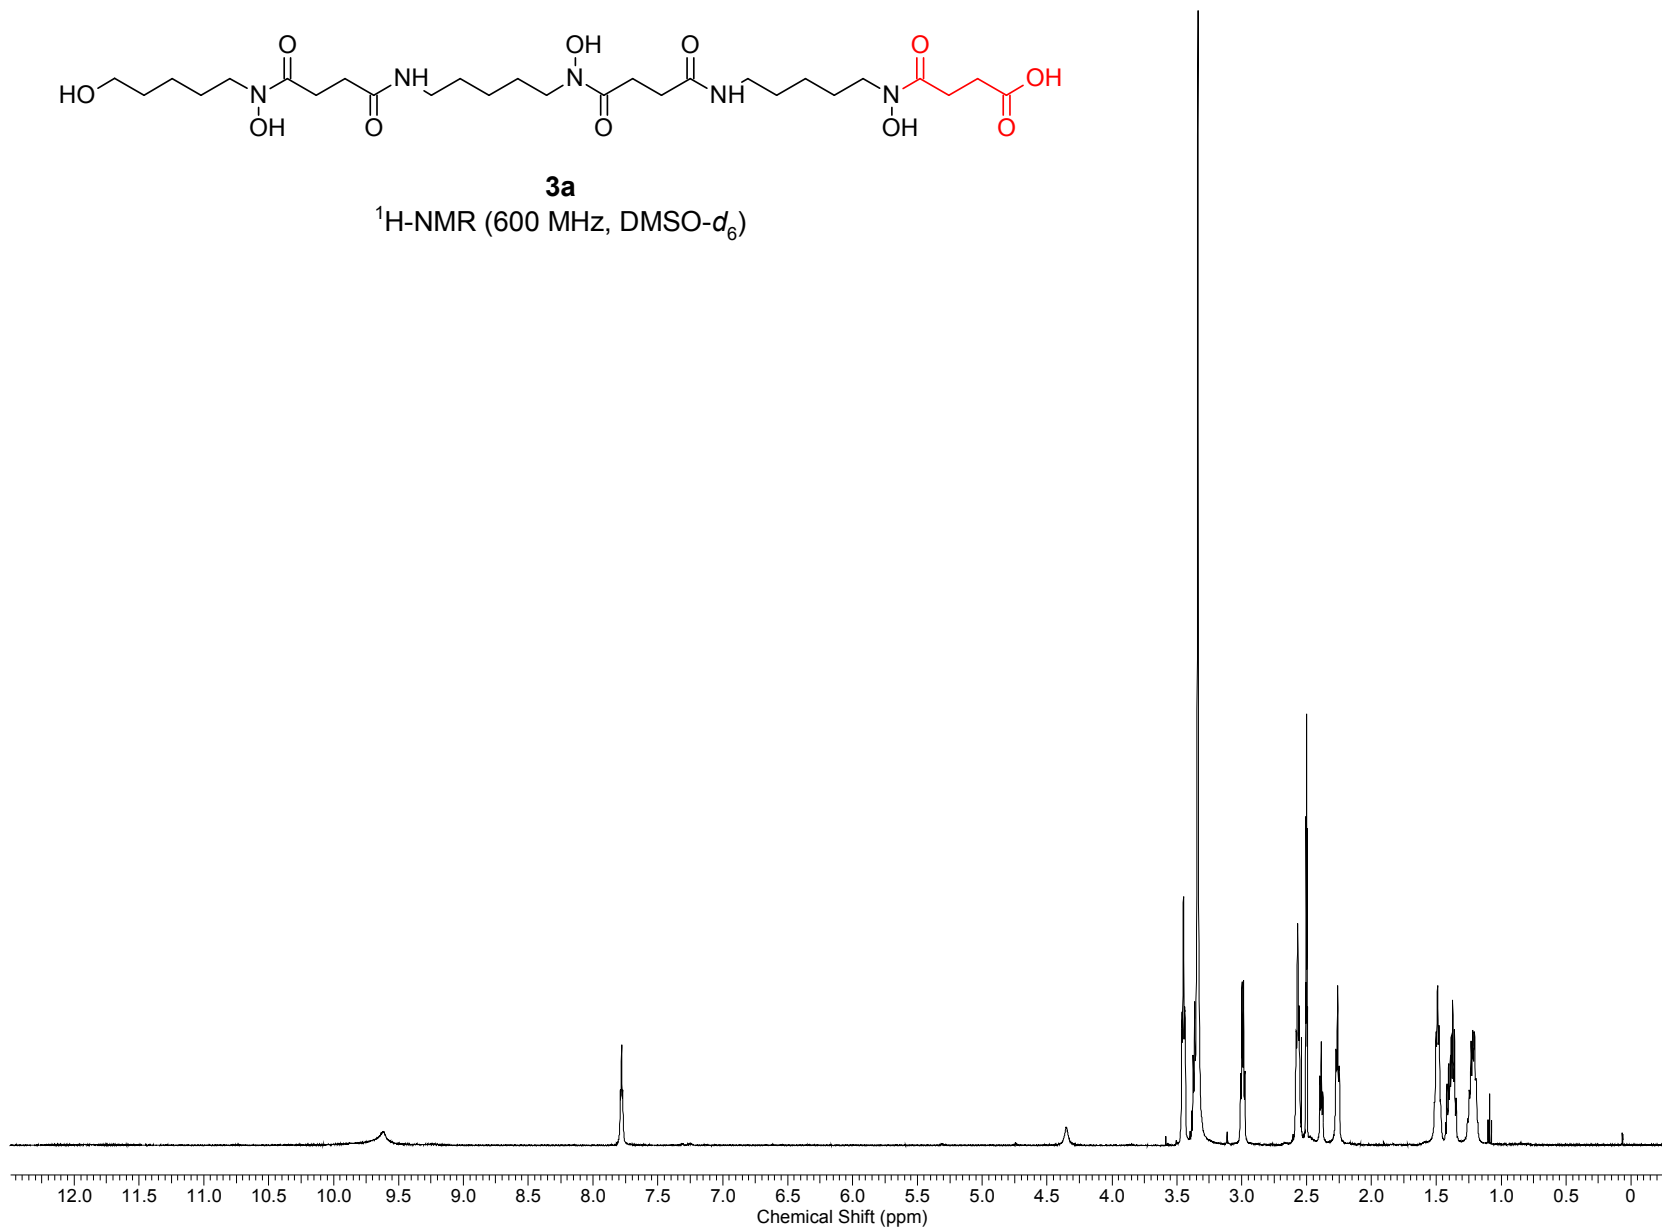

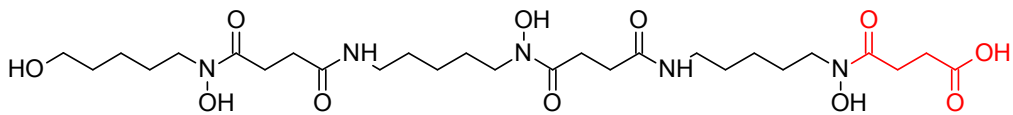

**3a**

$^{13}\text{C}$ -NMR (150 MHz, DMSO- $d_6$ )

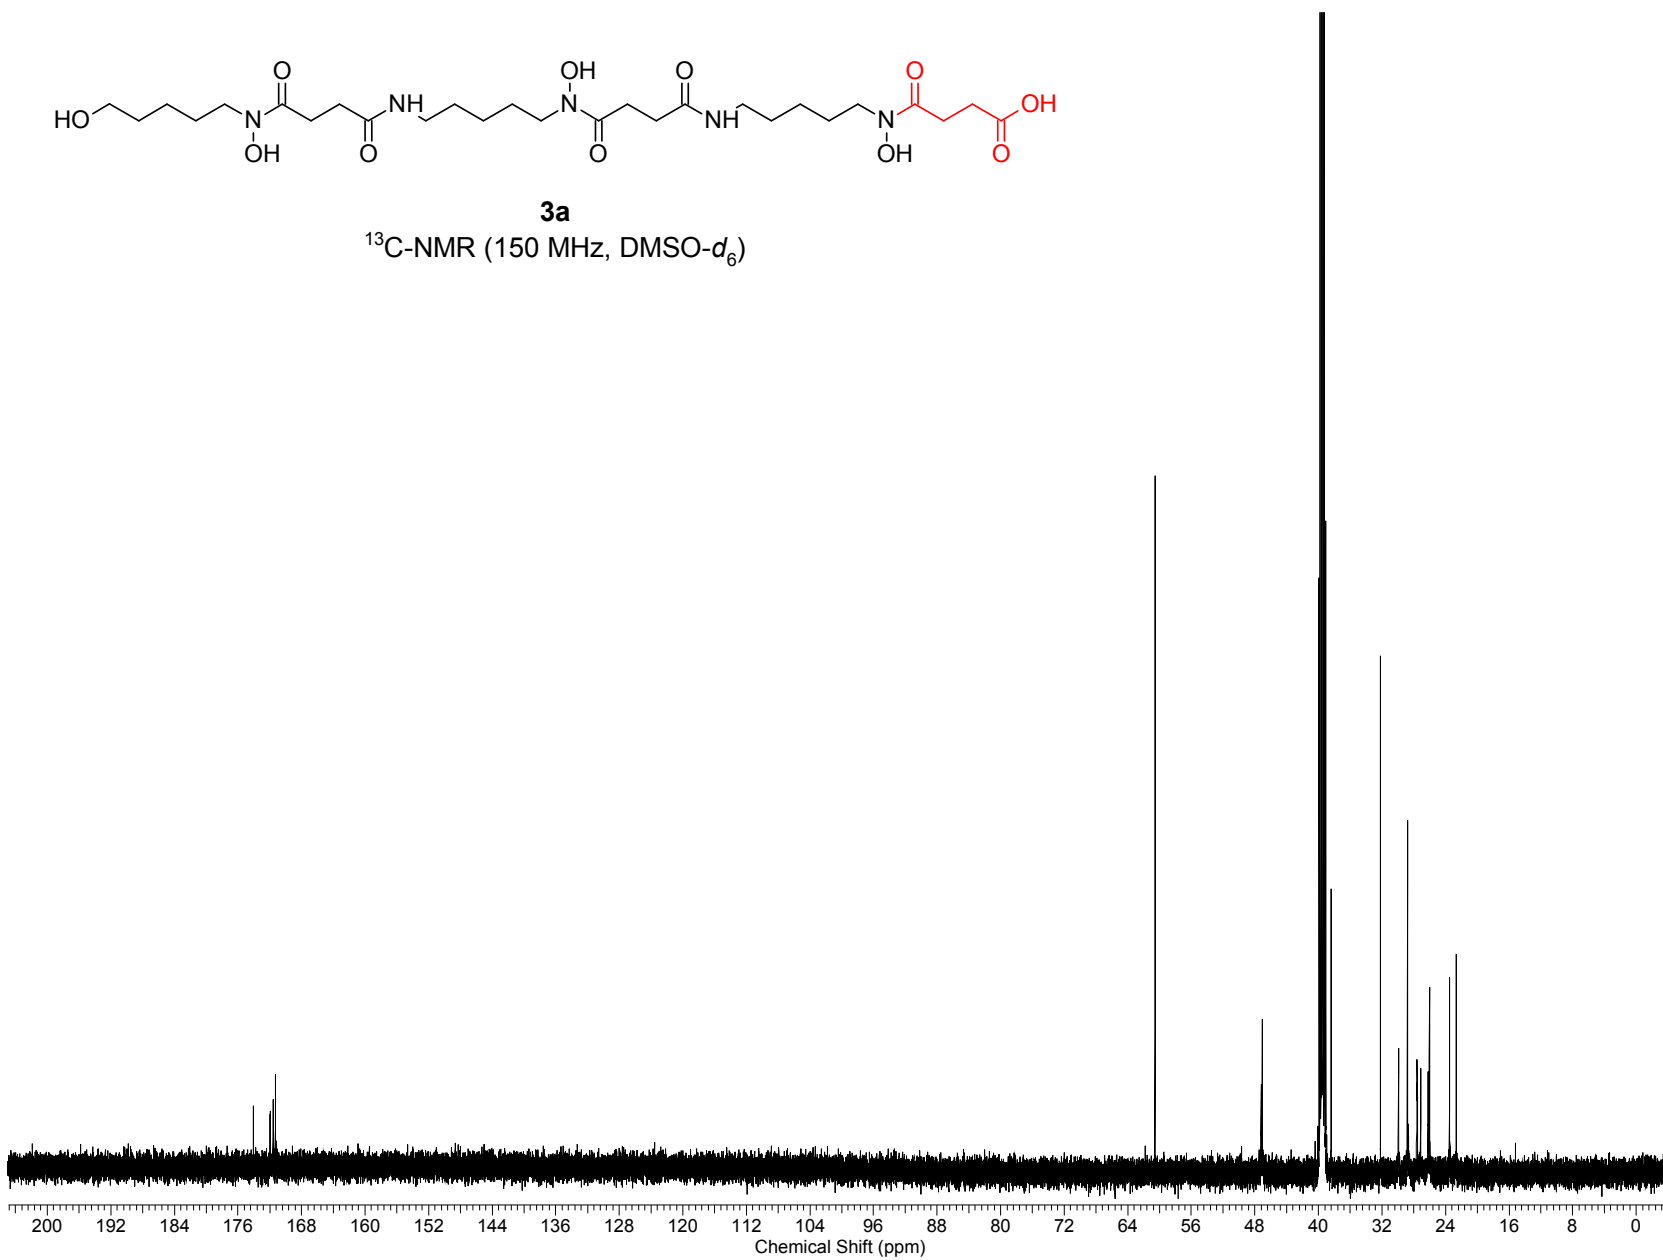

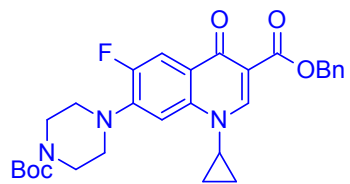

*N*-Boc-O-benzyl-ciprofloxacin  
<sup>1</sup>H-NMR (600 MHz, CDCl<sub>3</sub>)

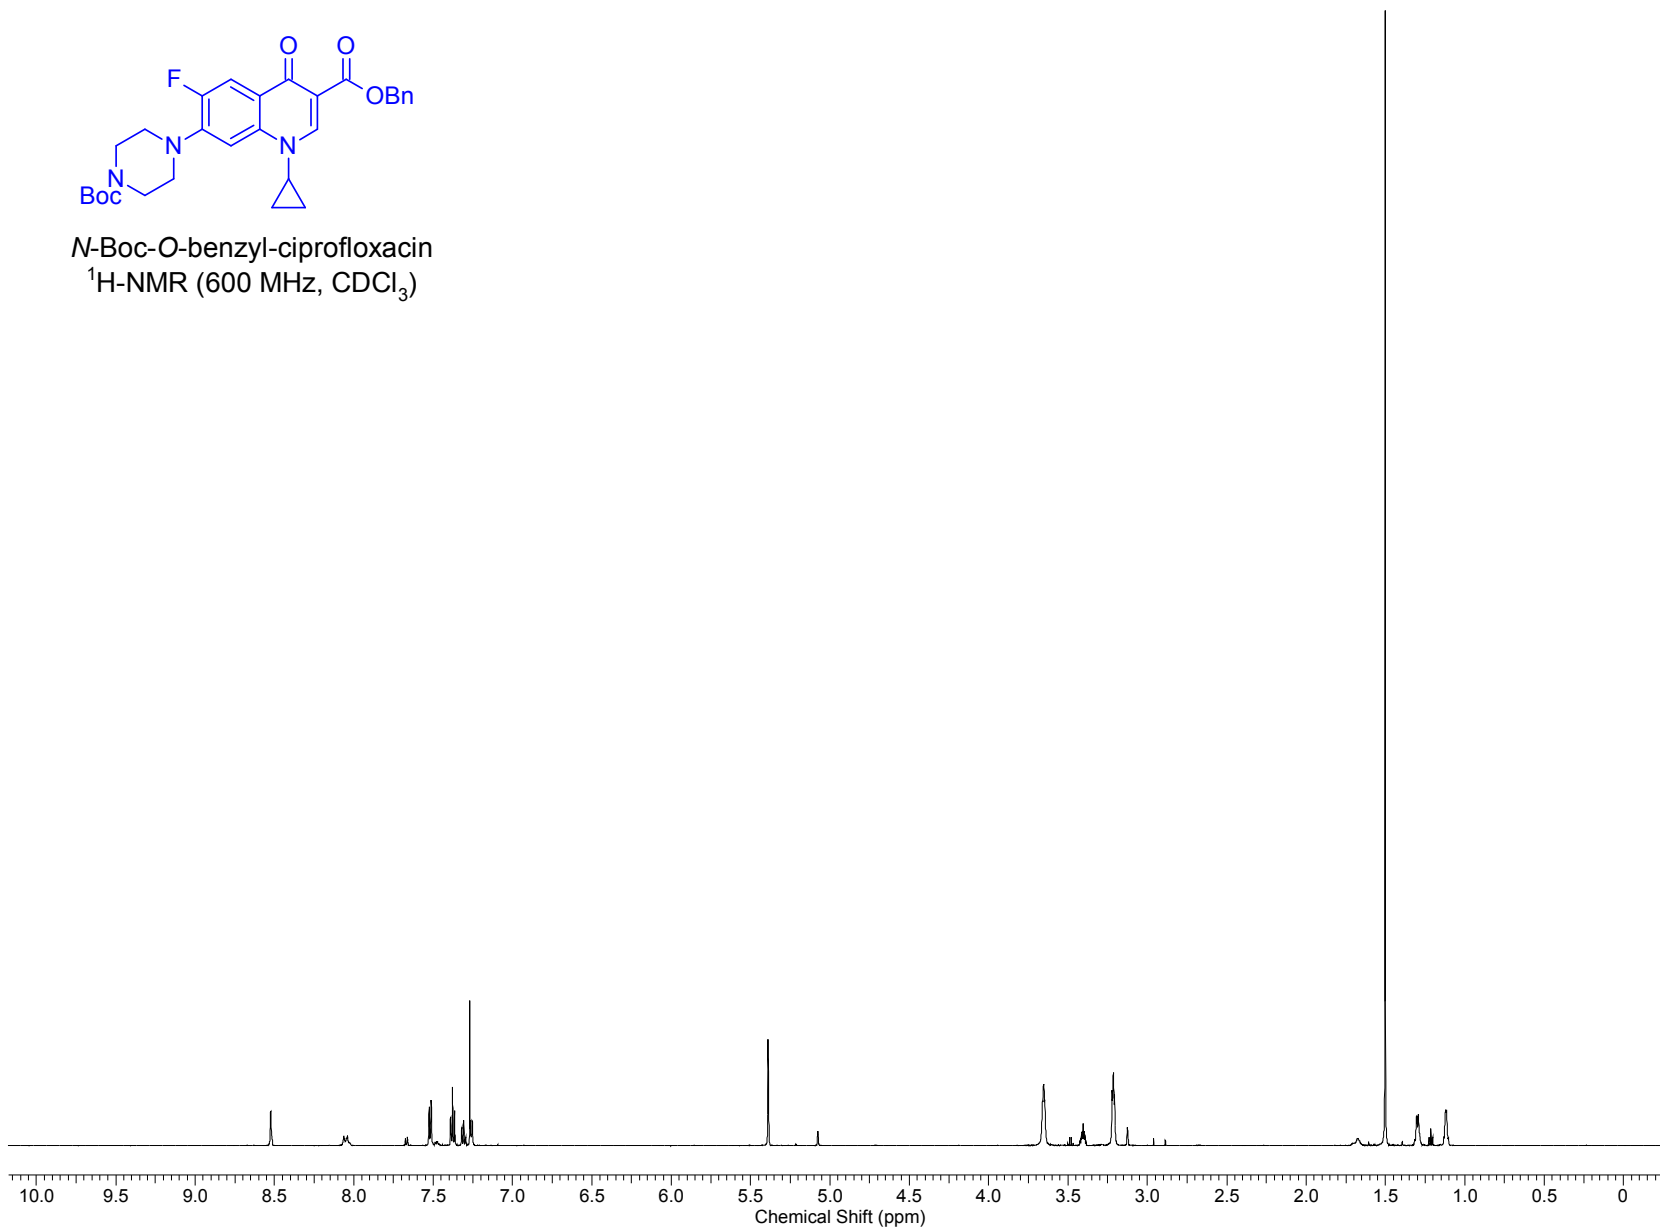

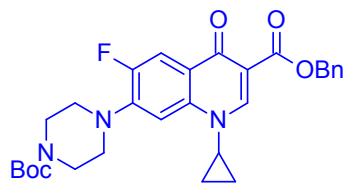

*N*-Boc-*O*-benzyl-ciprofloxacin  
 $^{13}\text{C}$ -NMR (150 MHz,  $\text{CDCl}_3$ )

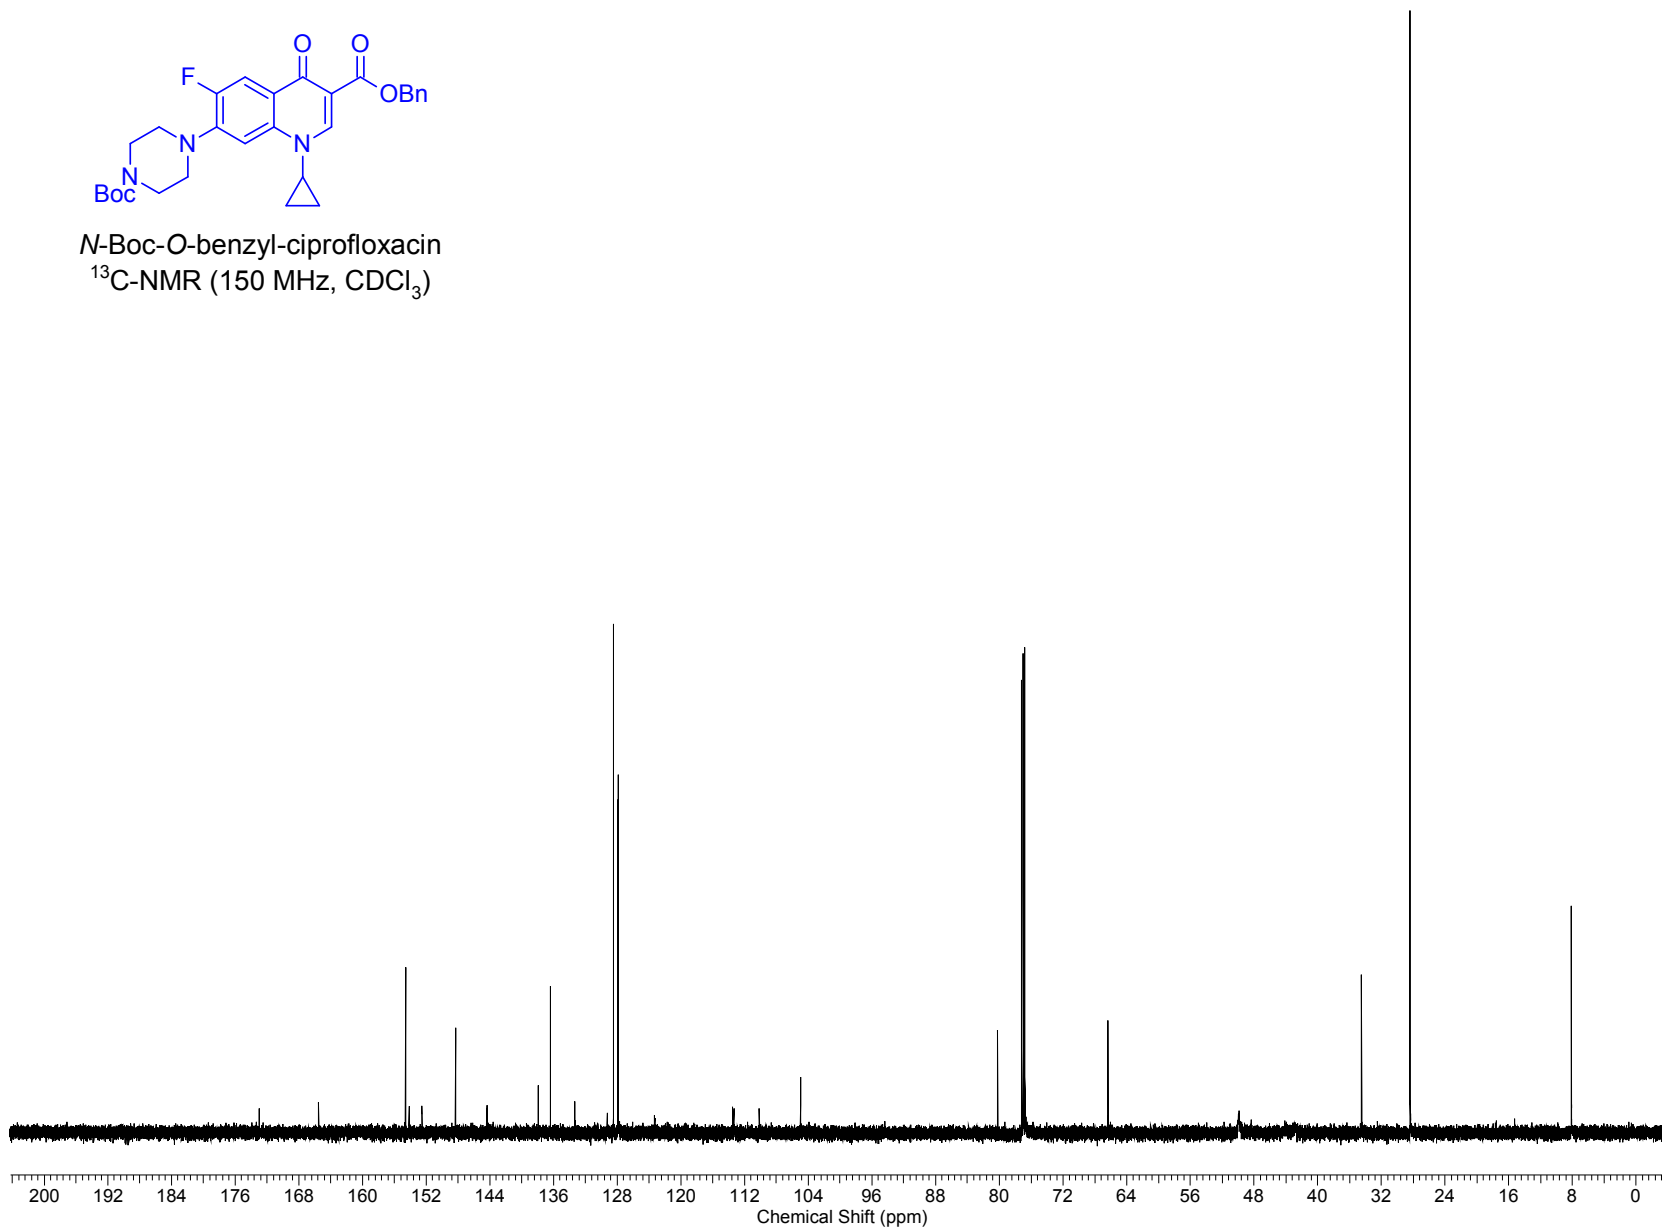

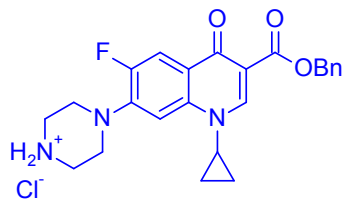

**10**

$^1\text{H-NMR}$  (600 MHz,  $\text{DMSO-}d_6$ )

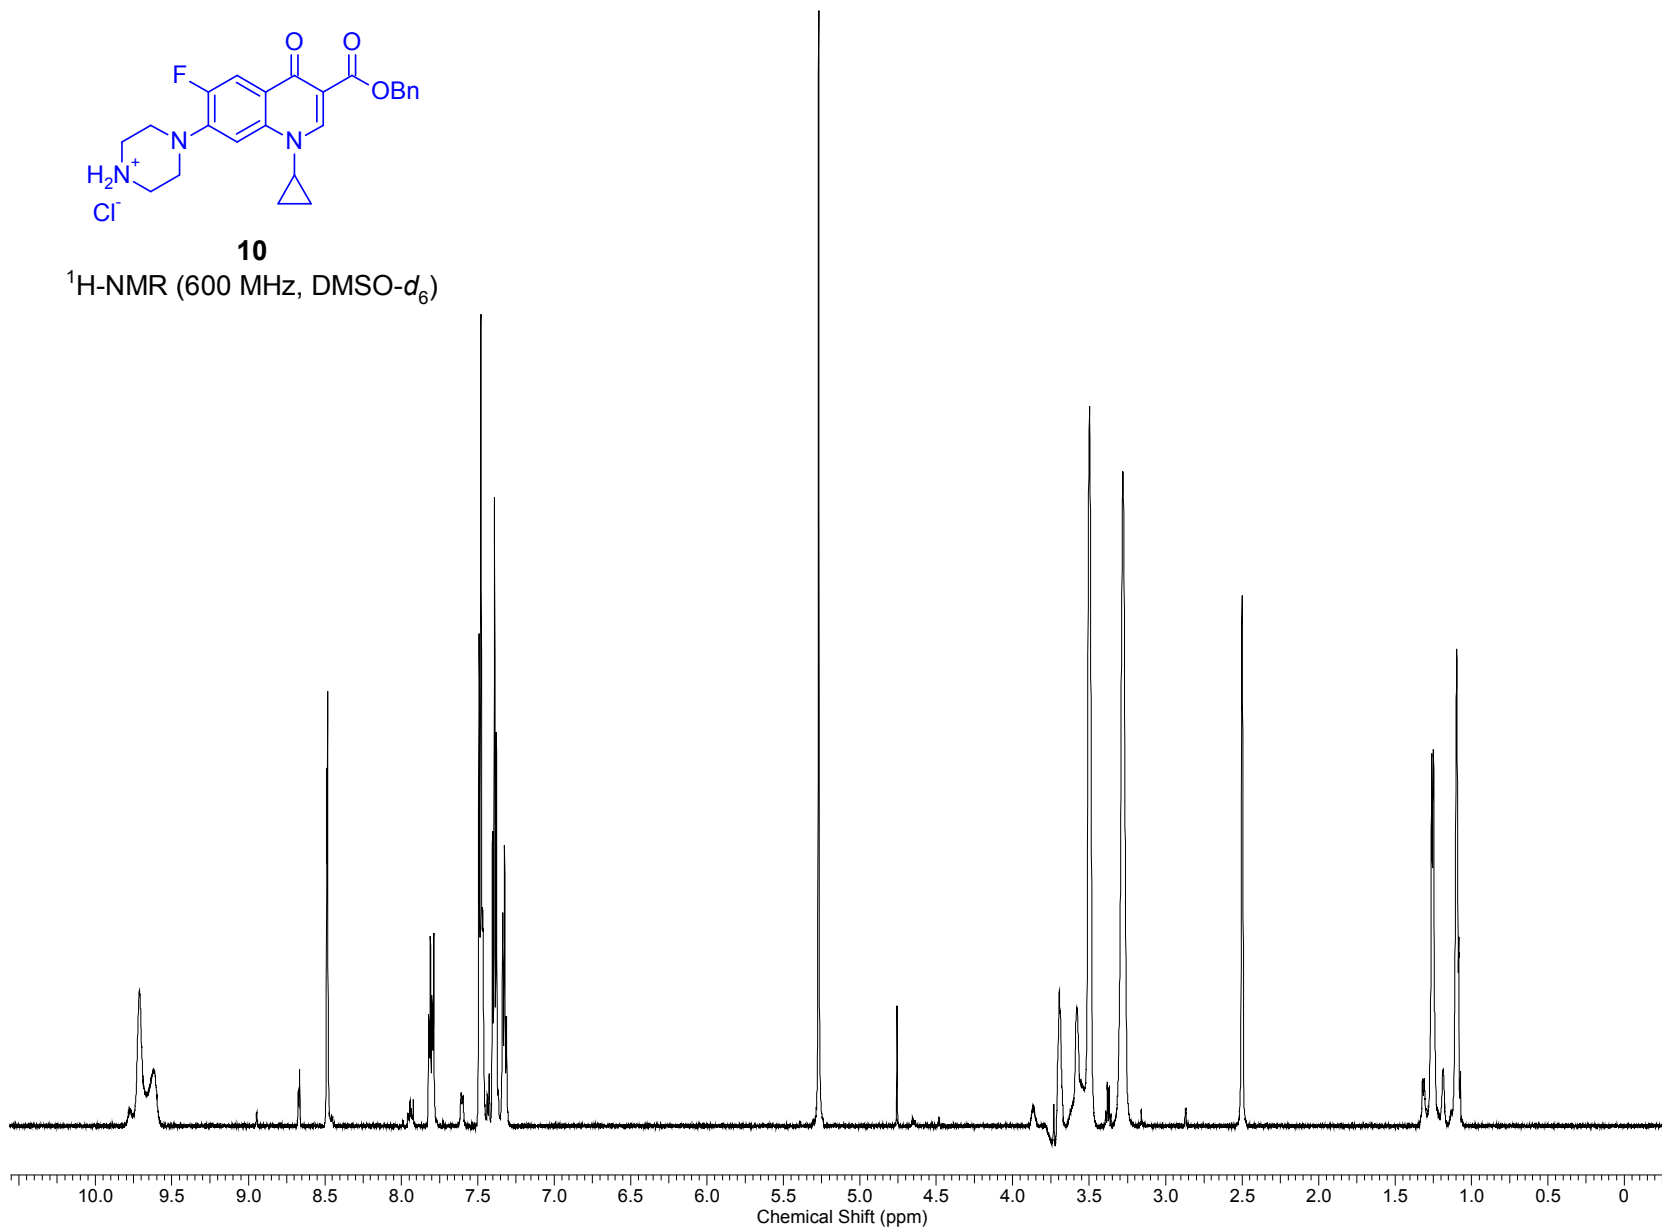

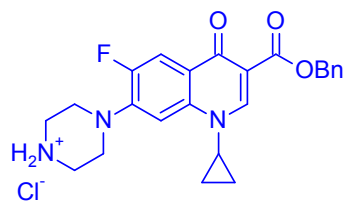

**10**

$^{13}\text{C}$ -NMR (150 MHz,  $\text{DMSO}-d_6$ )

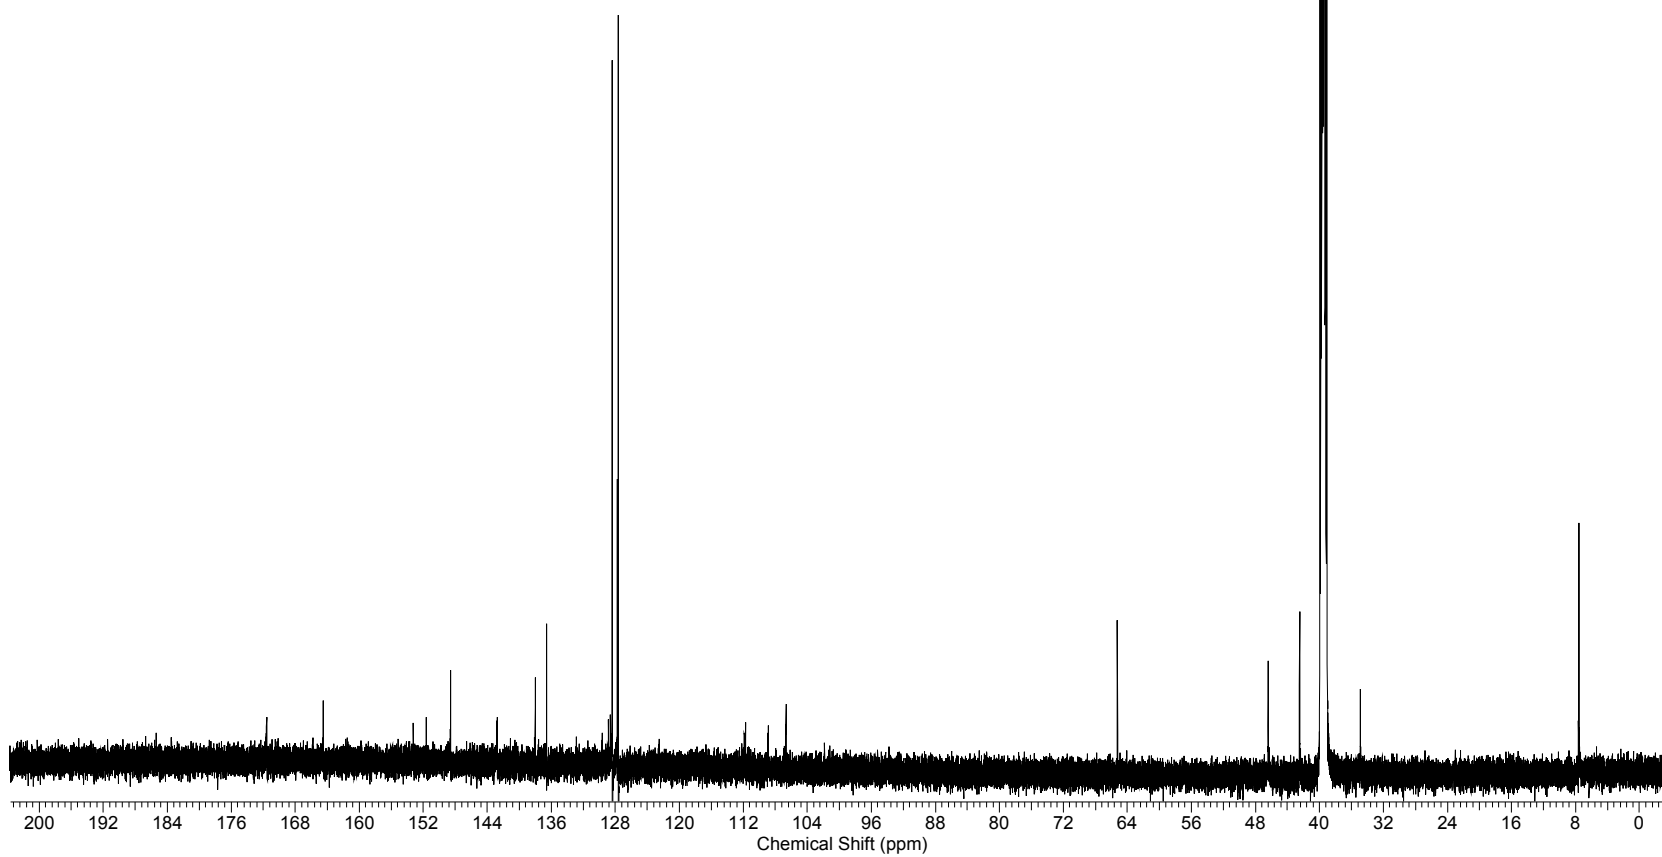

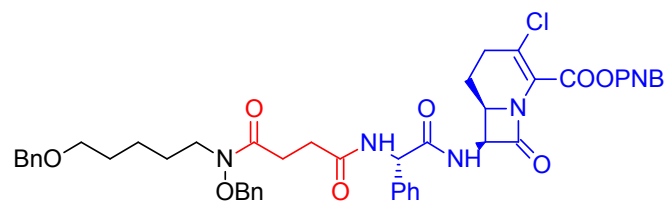

**11**

$^1\text{H-NMR}$  (600 MHz,  $\text{CDCl}_3$ )

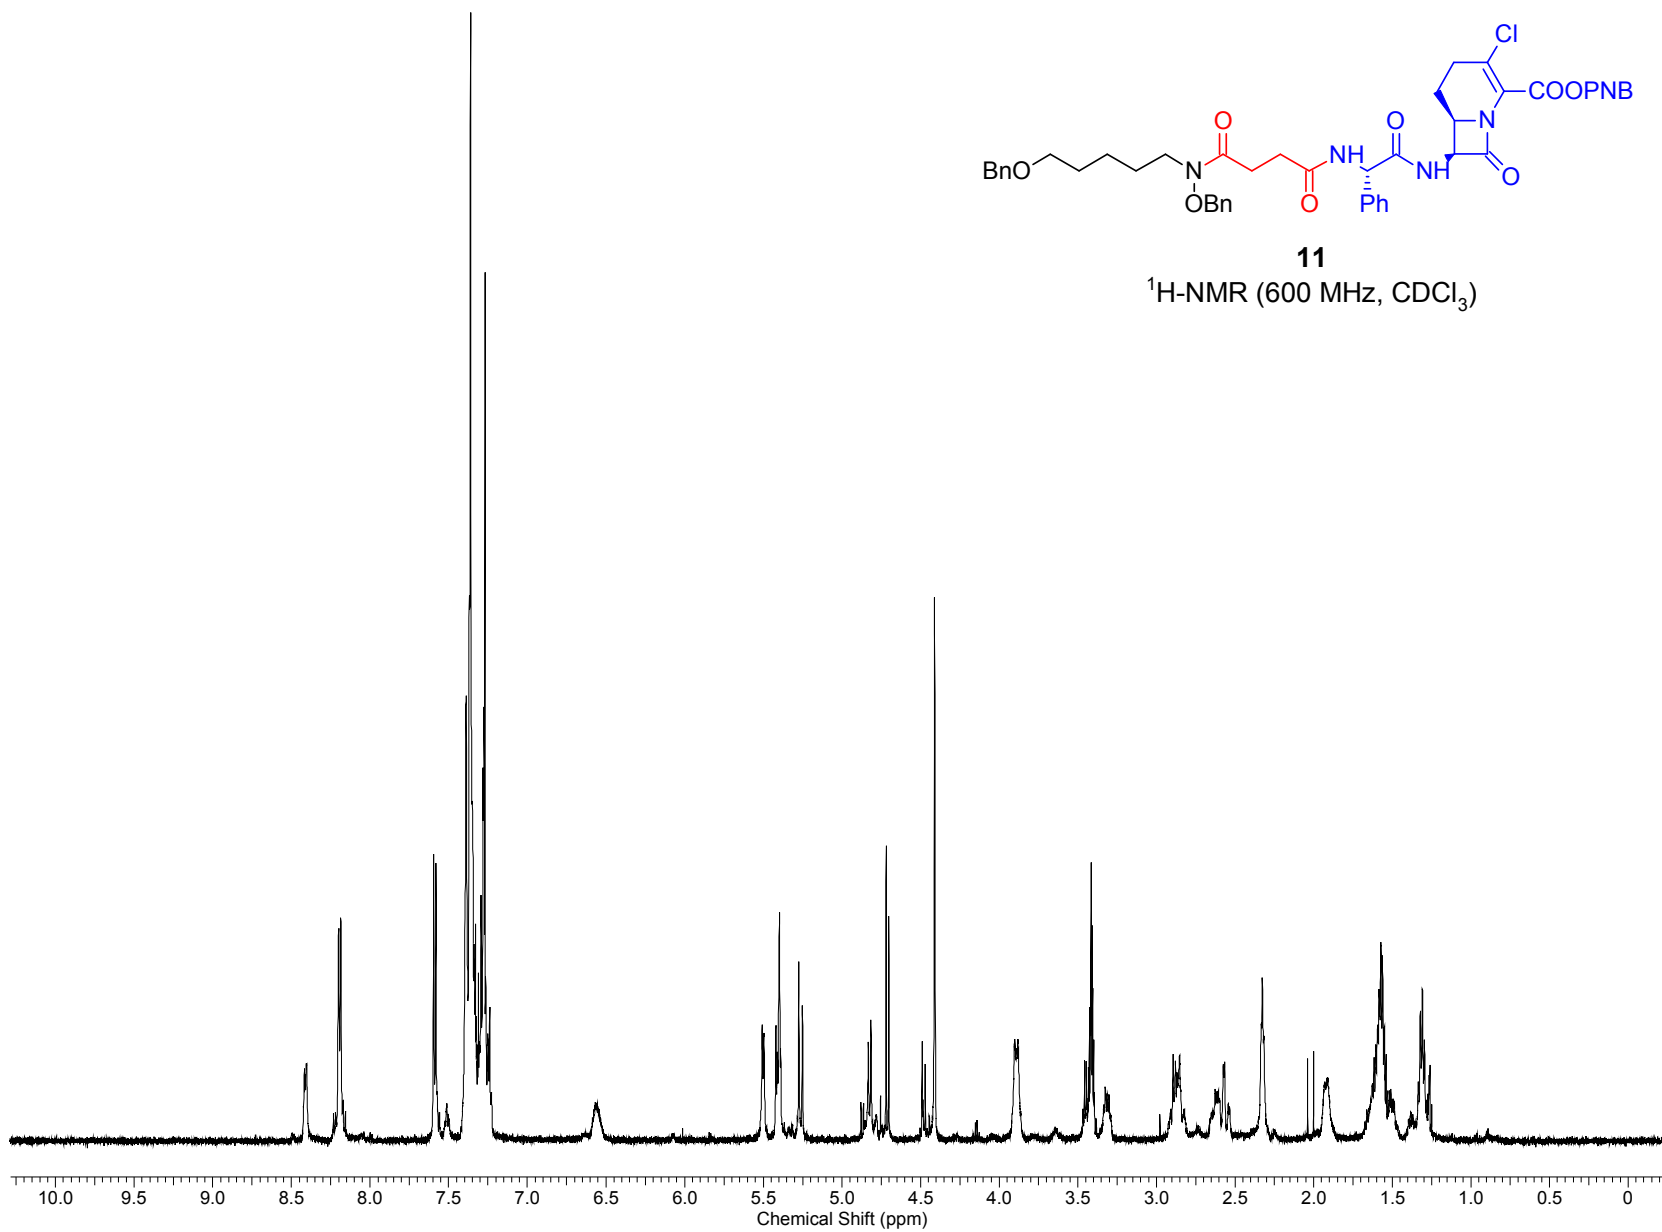

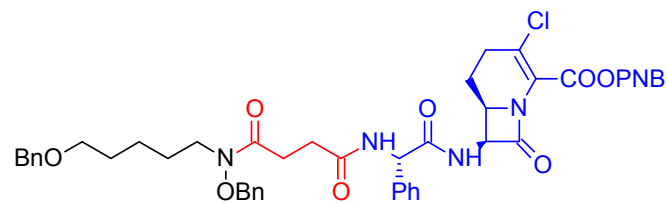

**11**

$^{13}\text{C}$ -NMR (150 MHz,  $\text{CDCl}_3$ )

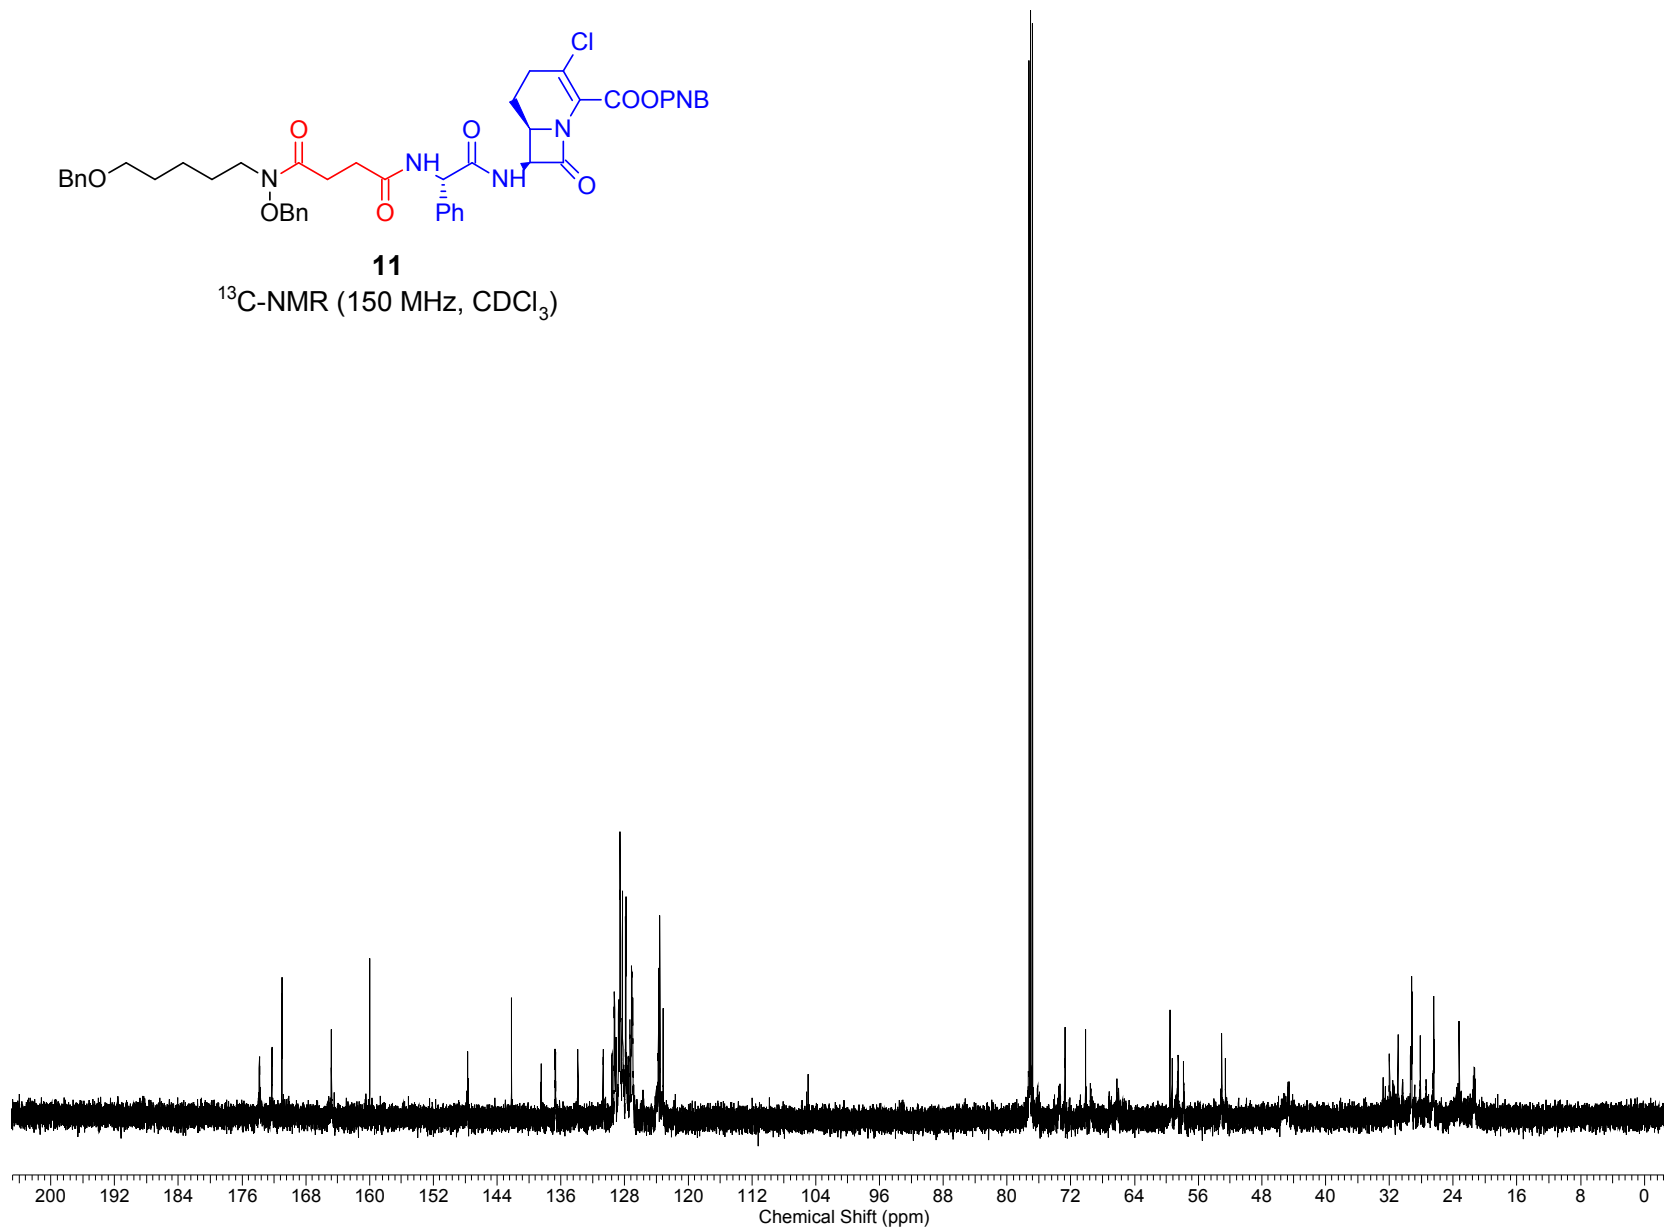

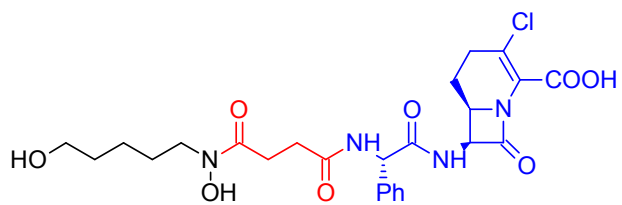

**1b**

$^1\text{H-NMR}$  (600 MHz,  $\text{CD}_3\text{OD}$ )

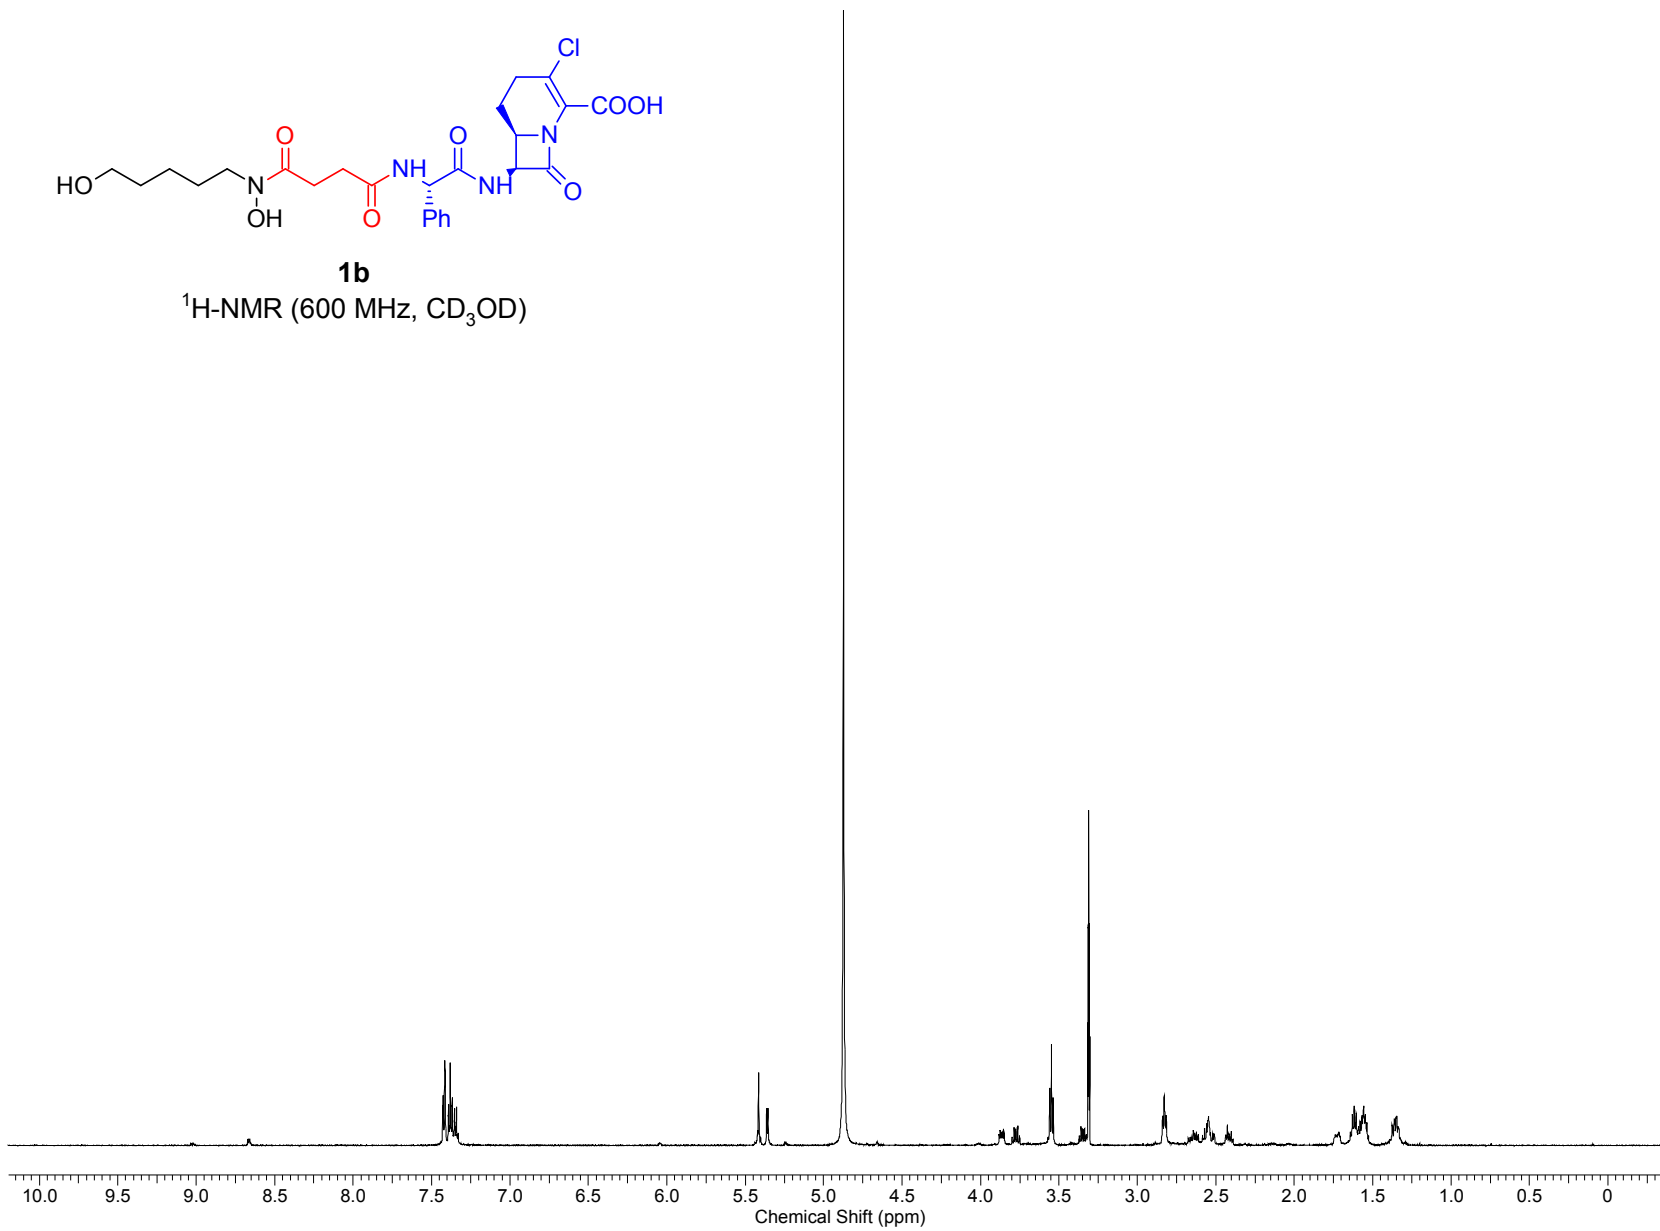

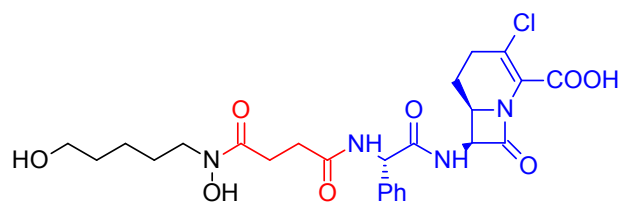

**1b**

$^{13}\text{C}$ -NMR (150 MHz,  $\text{CD}_3\text{OD}$ )

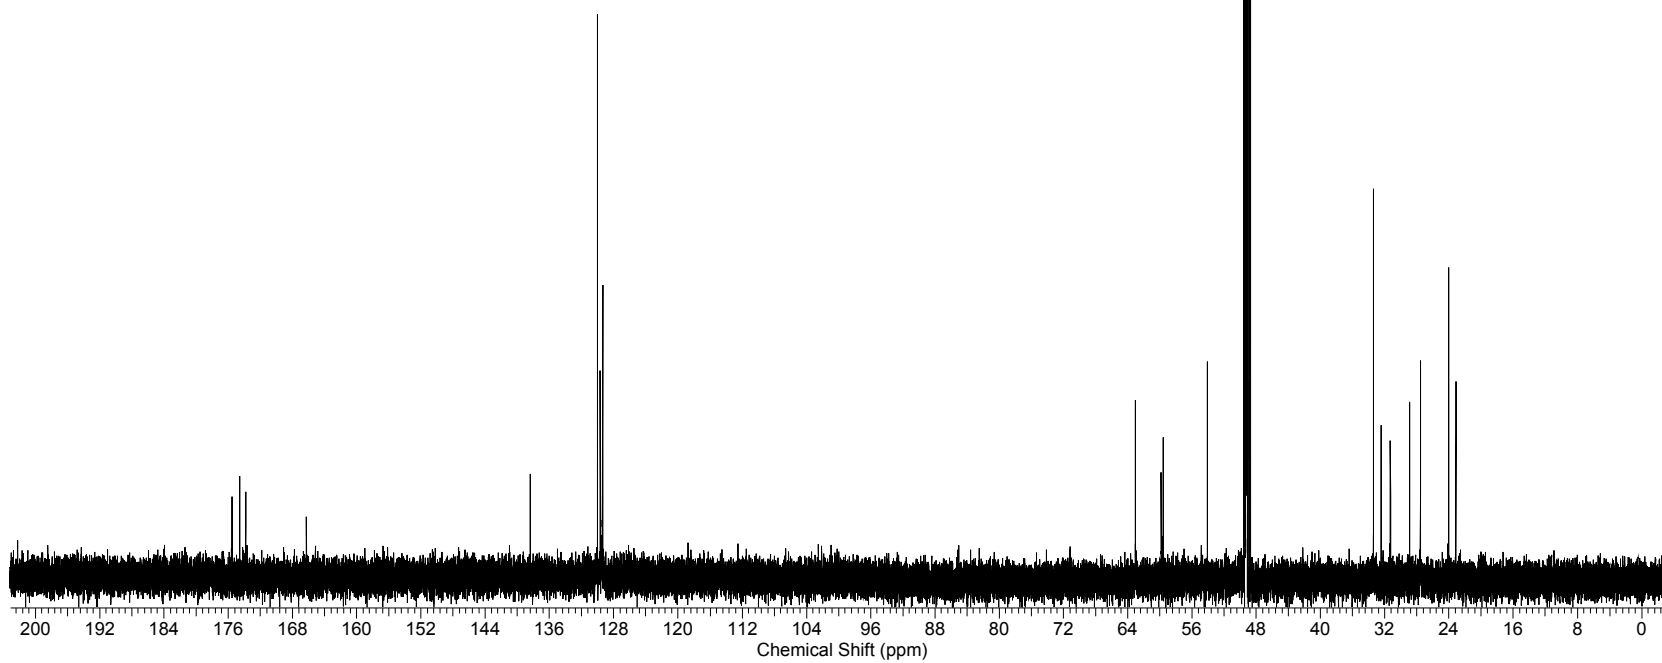

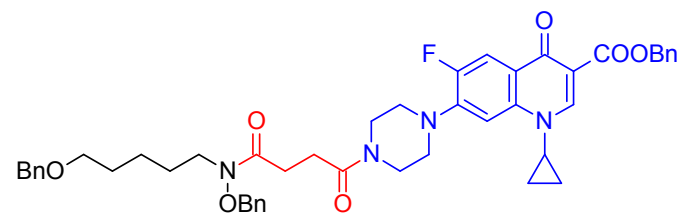

**12**

$^1\text{H-NMR}$  (600 MHz,  $\text{CDCl}_3$ )

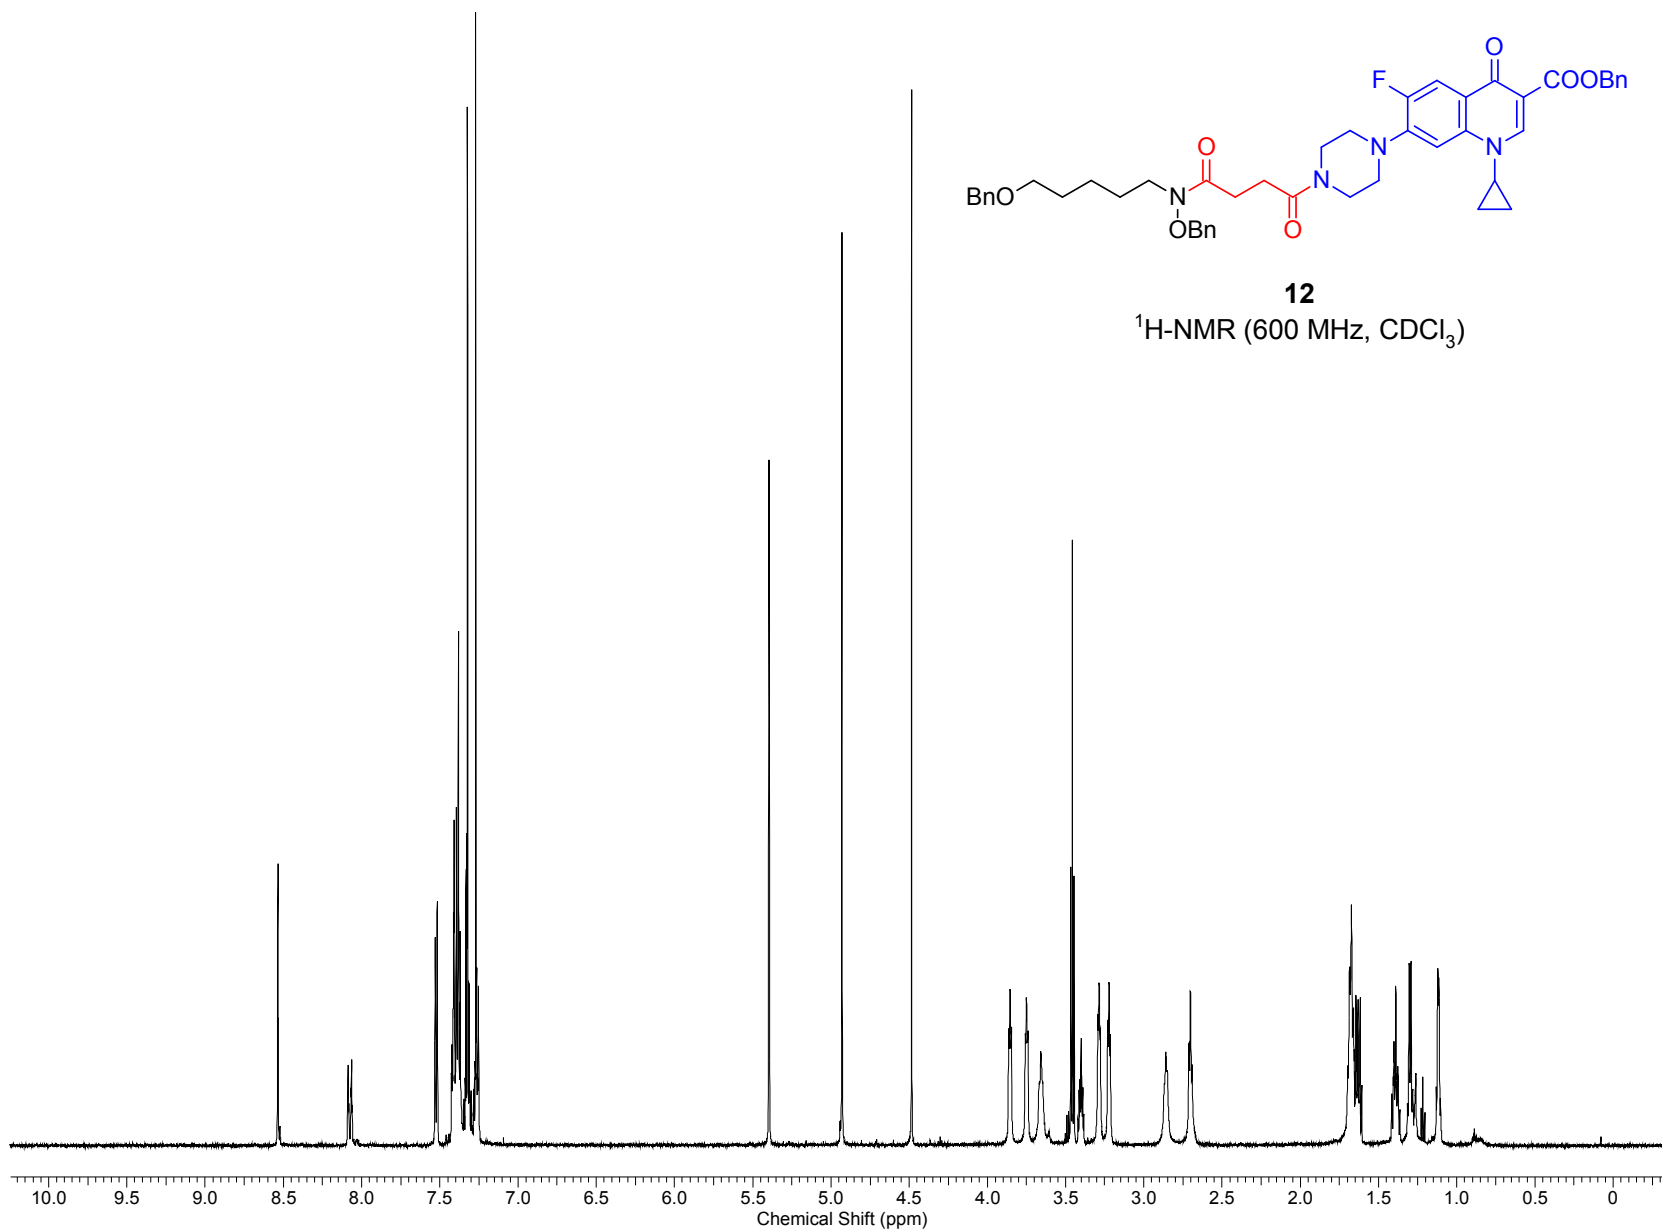

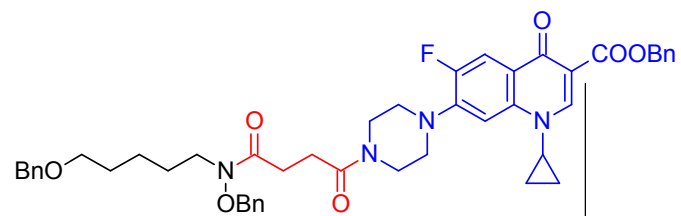

**12**

$^{13}\text{C}$ -NMR (150 MHz,  $\text{CDCl}_3$ )

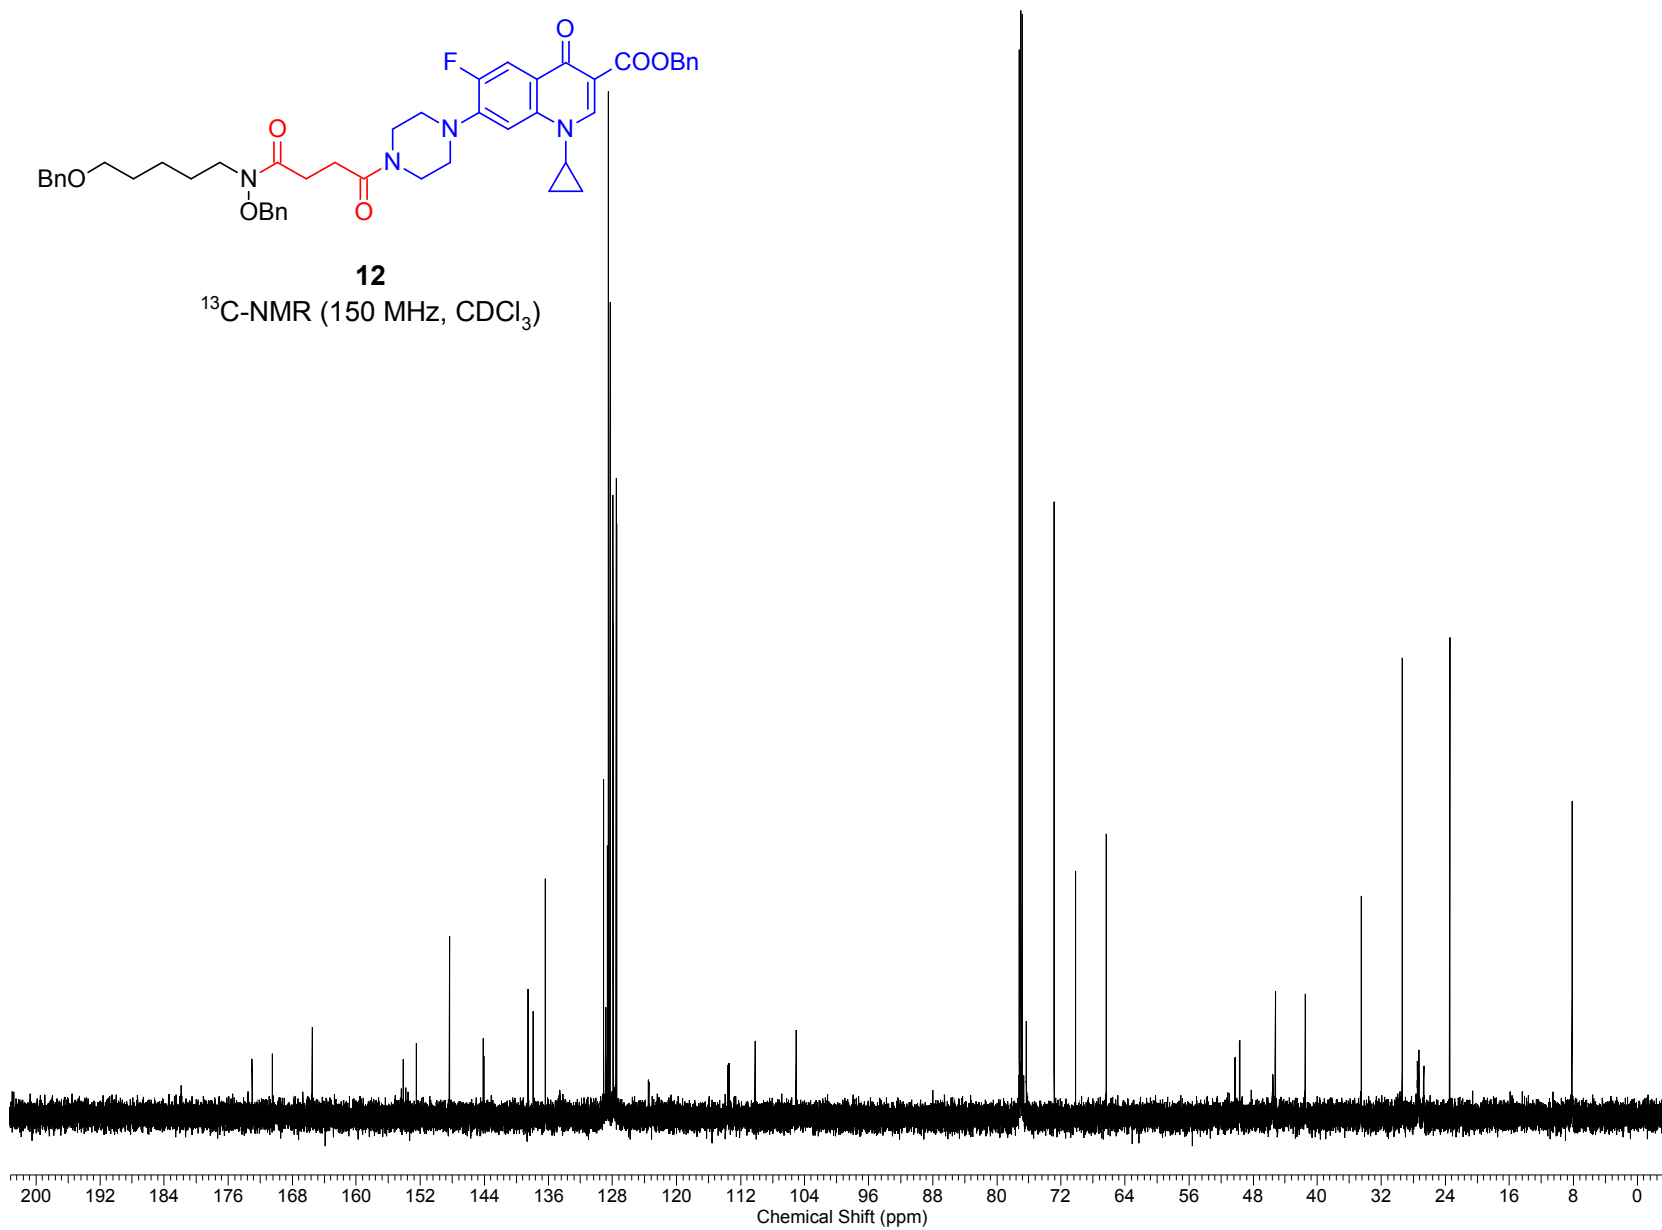

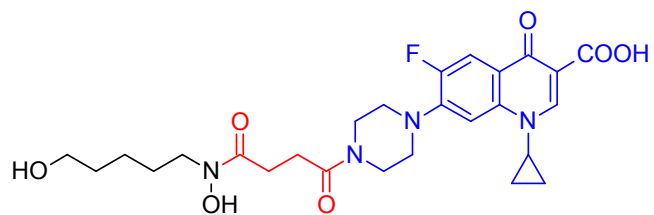

**1c**

$^1\text{H-NMR}$  (600 MHz,  $\text{CD}_3\text{OD}$ )

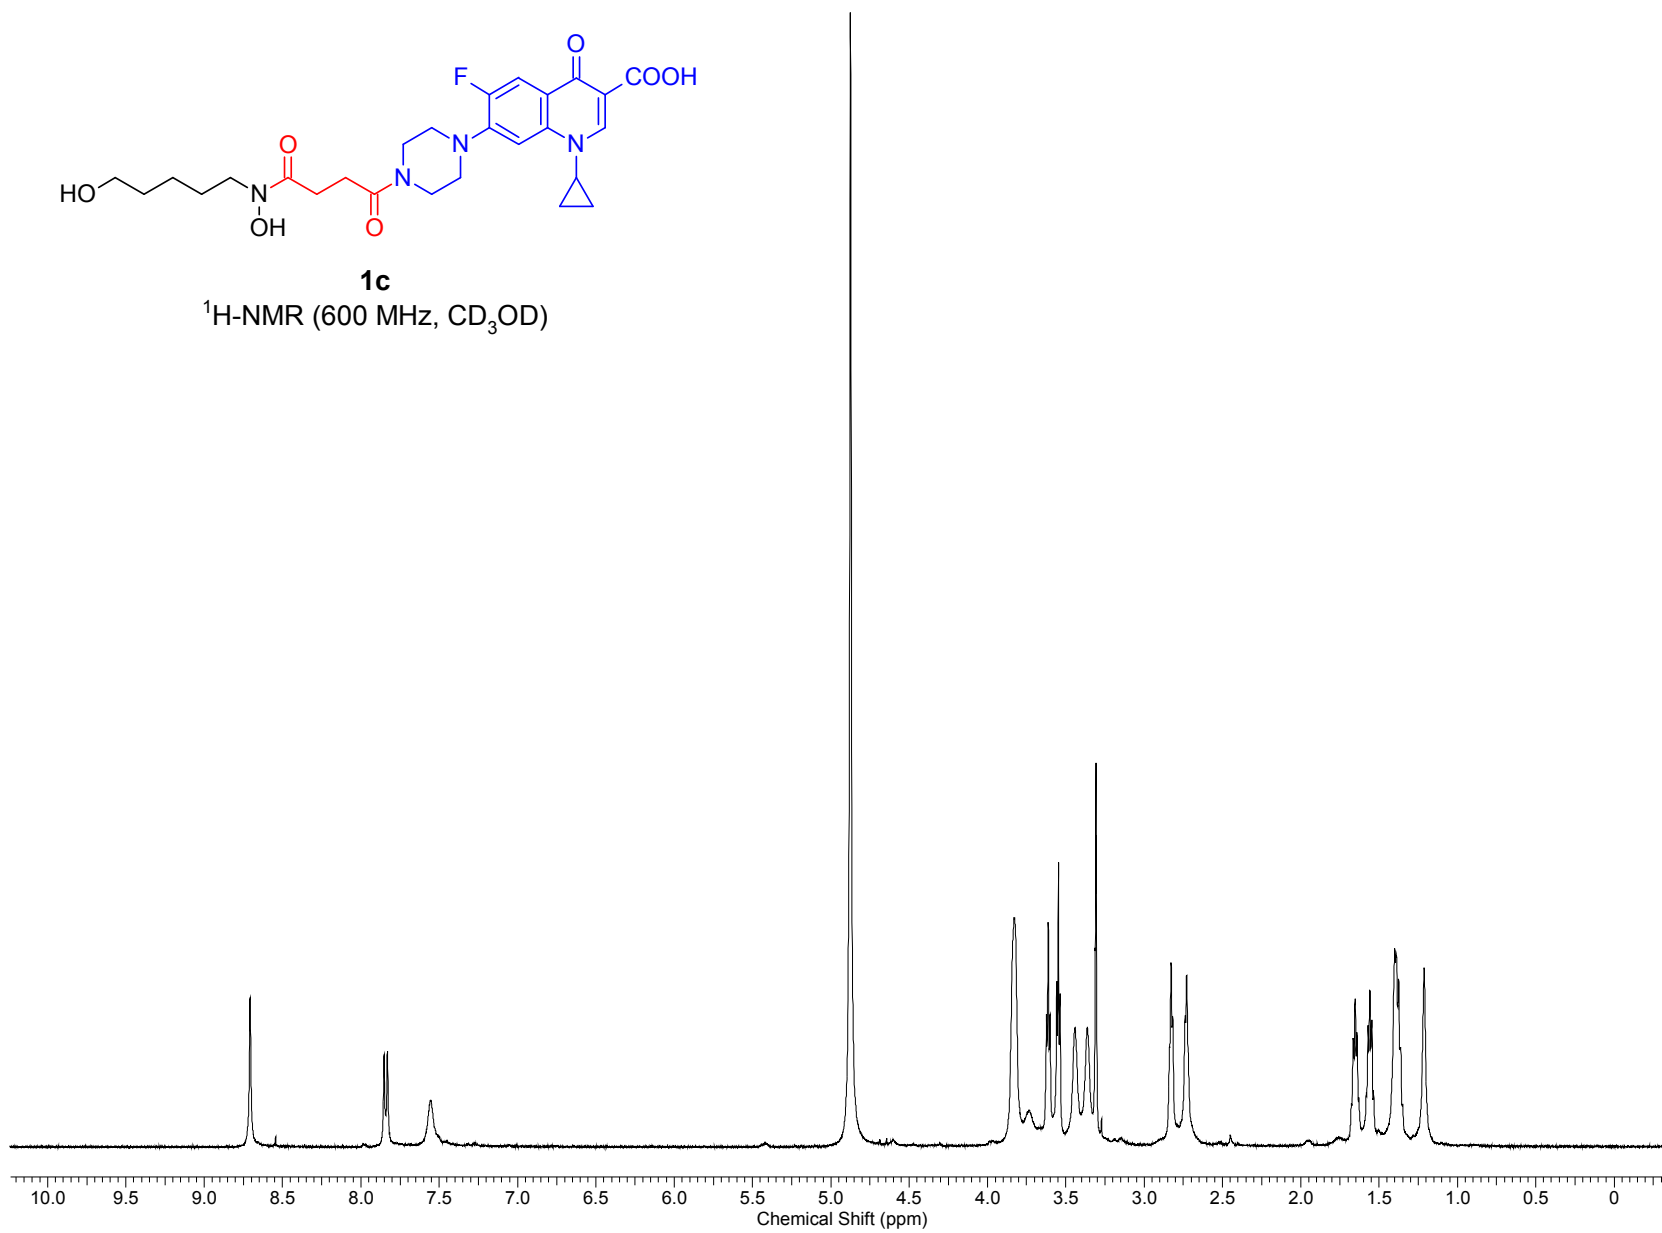

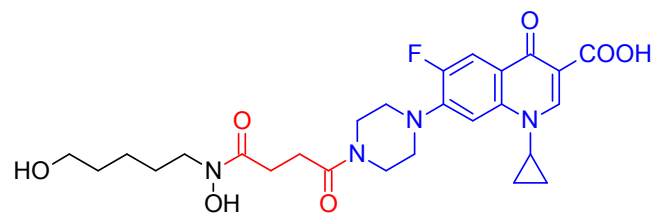

**1c**

$^{13}\text{C}$ -NMR (150 MHz,  $\text{CD}_3\text{OD}$ )

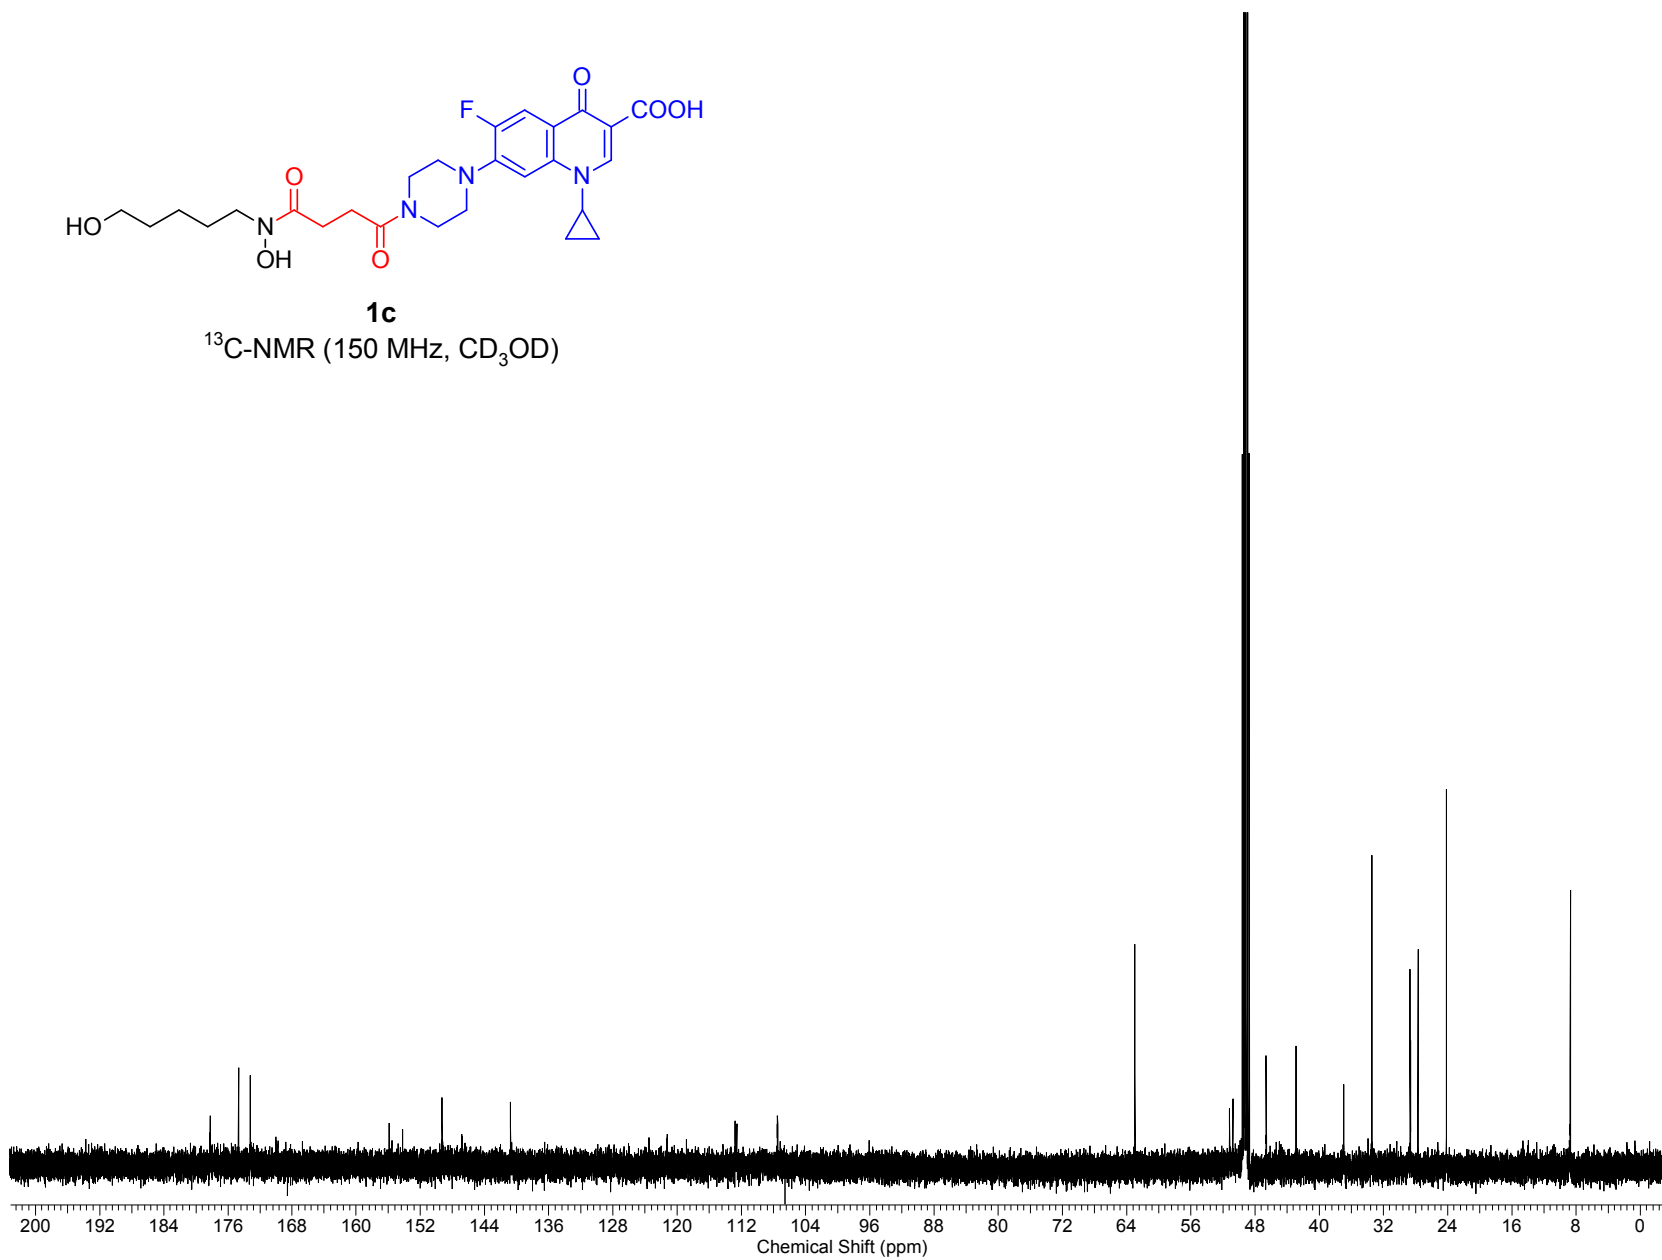

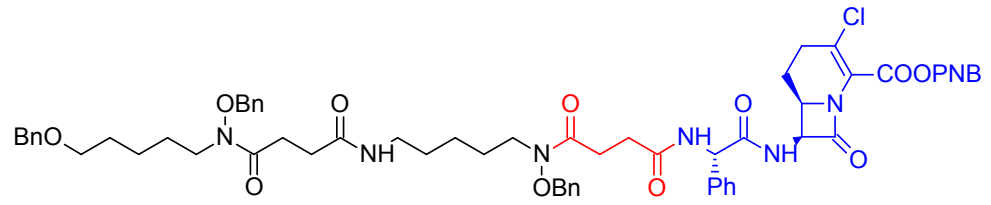

**13**

$^1\text{H-NMR}$  (600 MHz,  $\text{CDCl}_3$ )

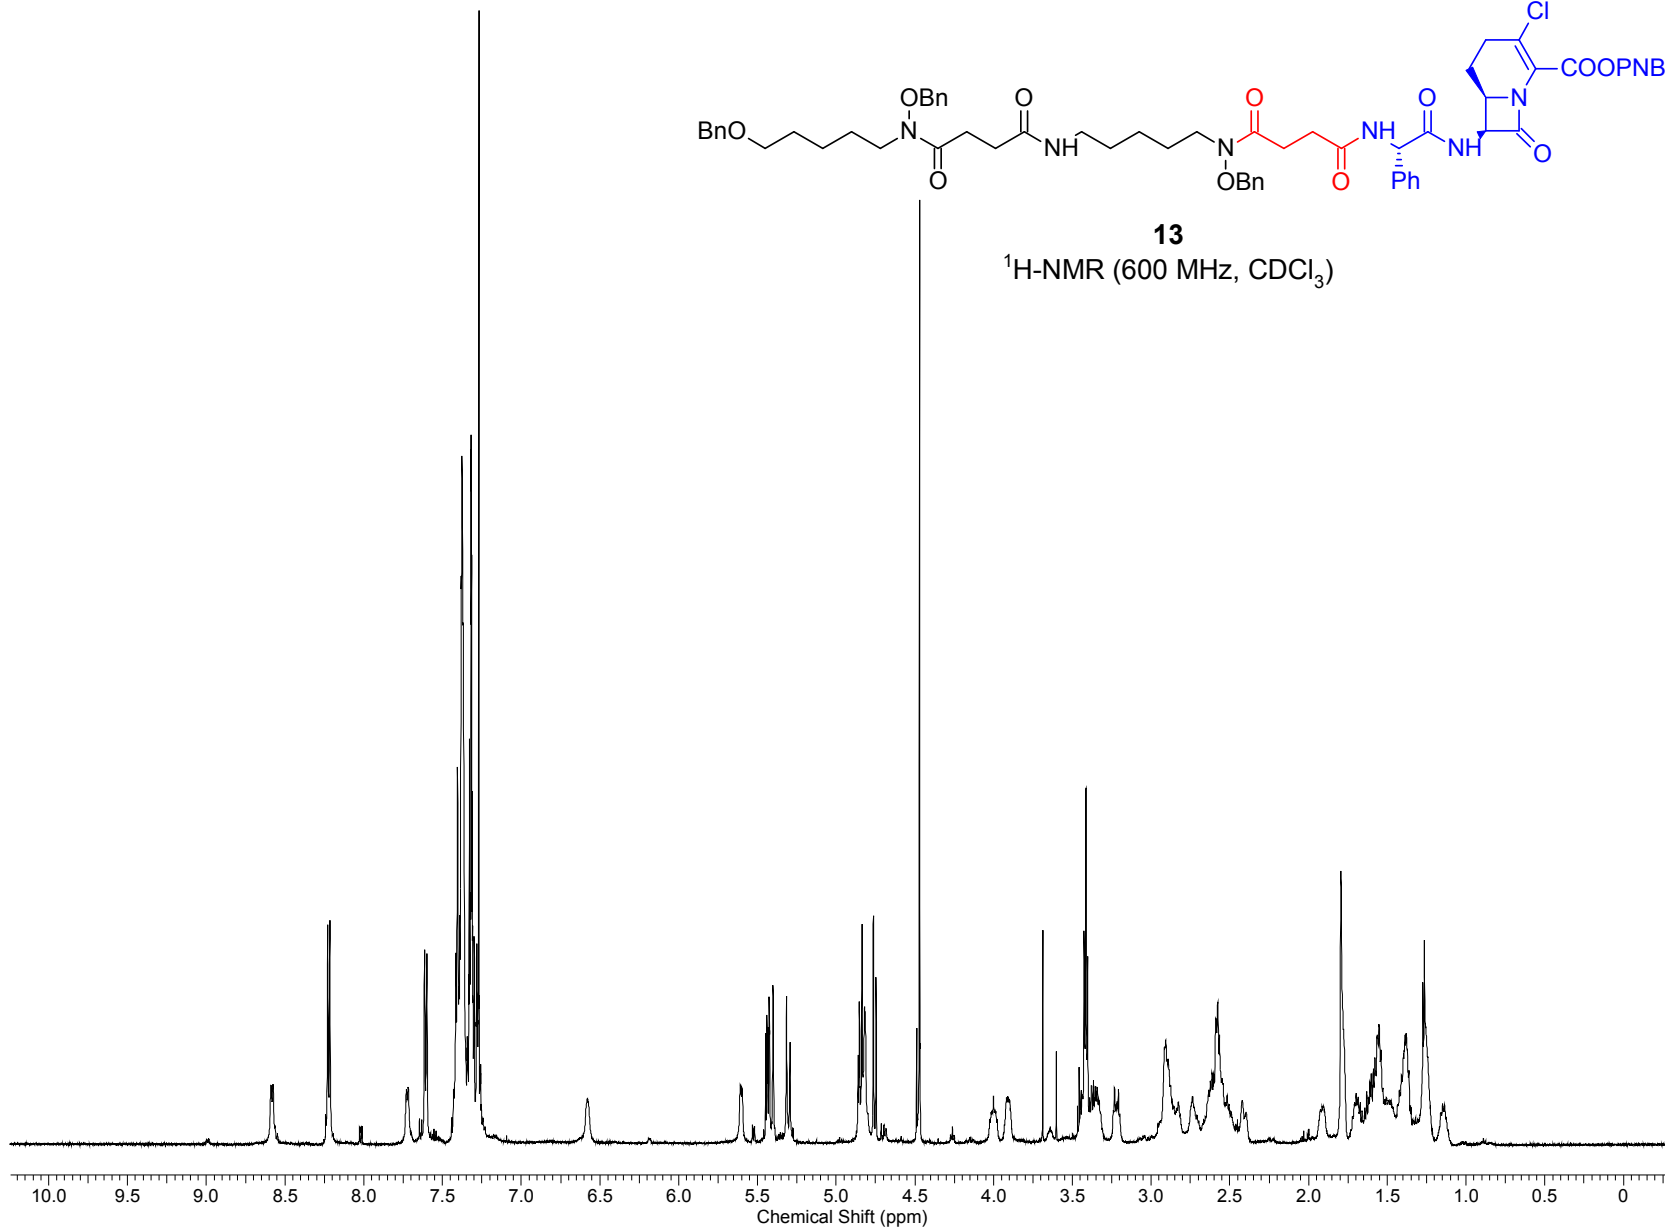

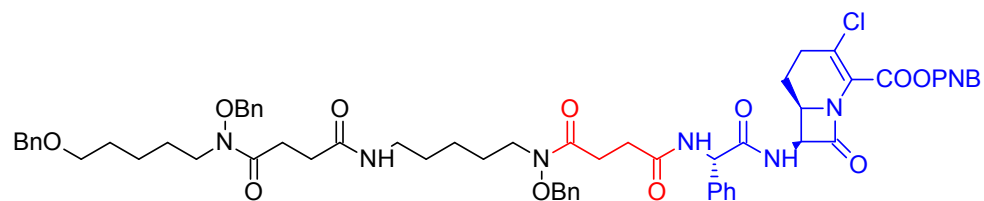

**13**

<sup>13</sup>C-NMR (150 MHz, CDCl<sub>3</sub>)

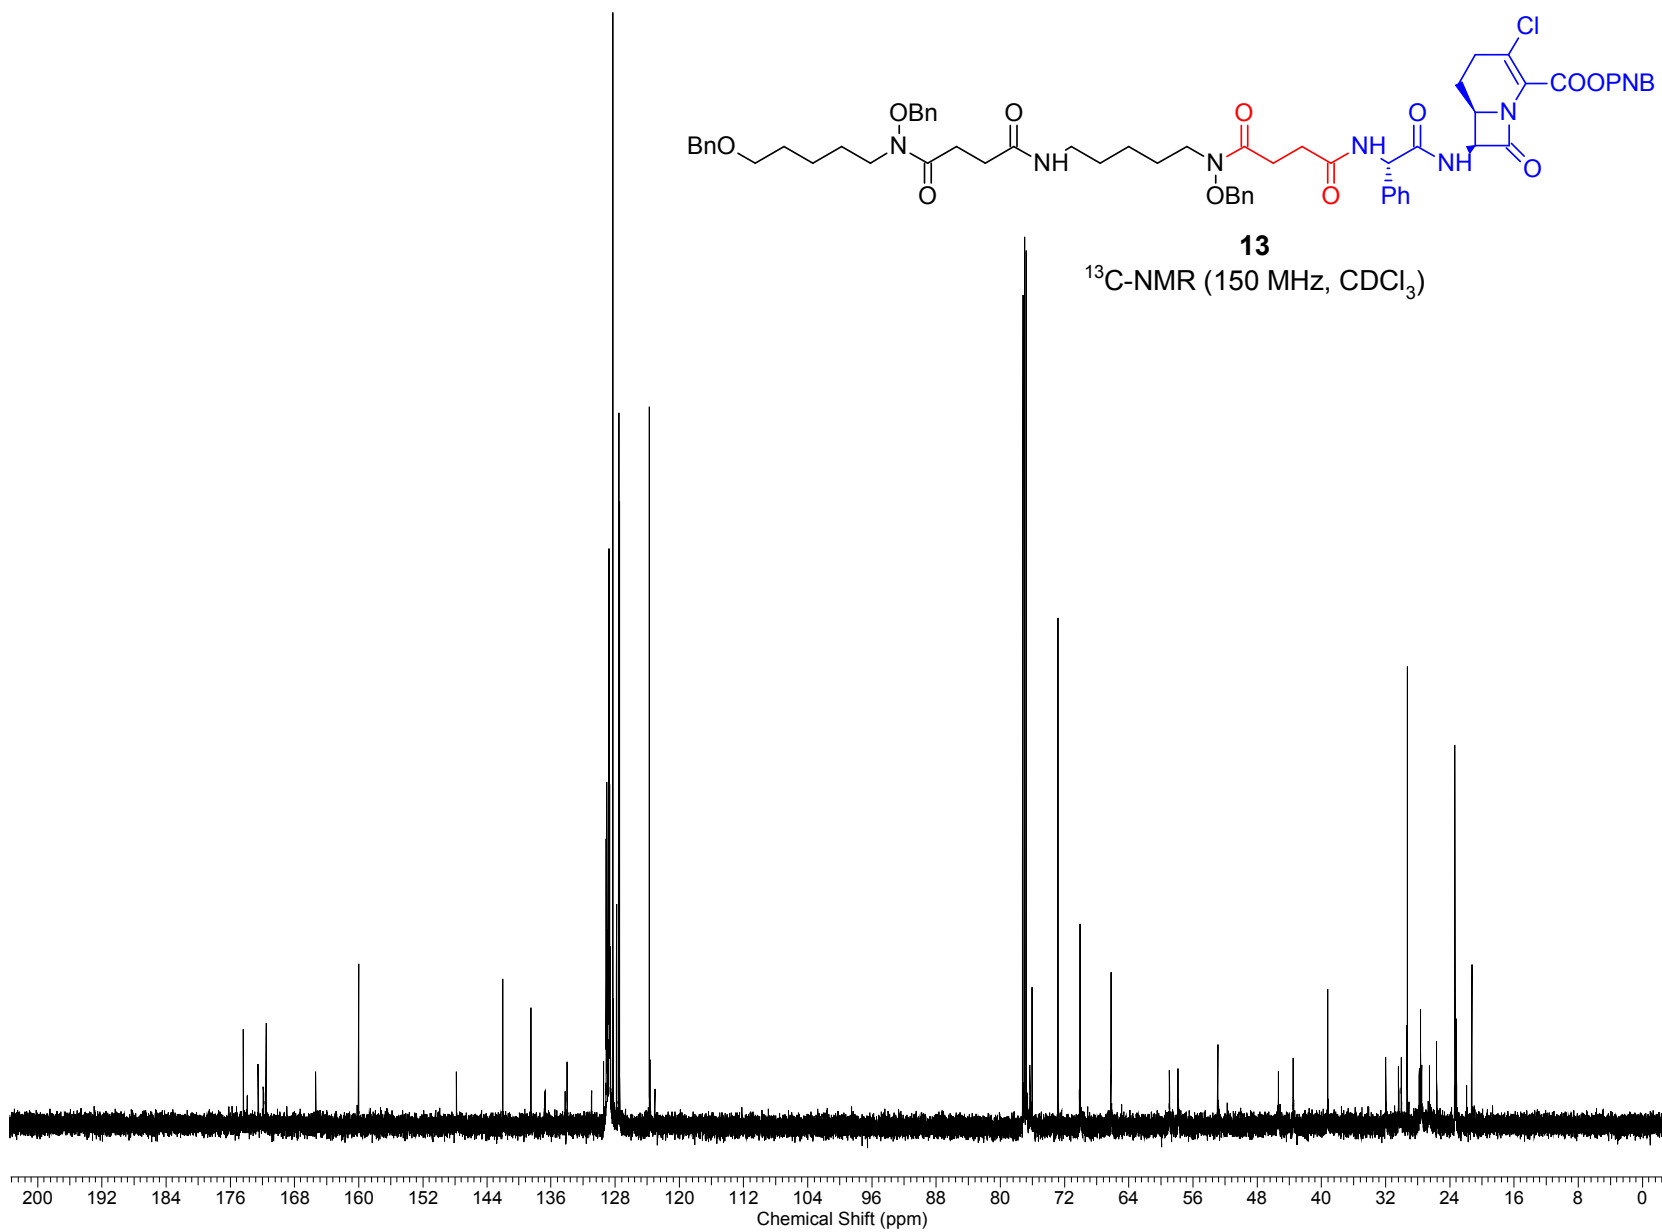

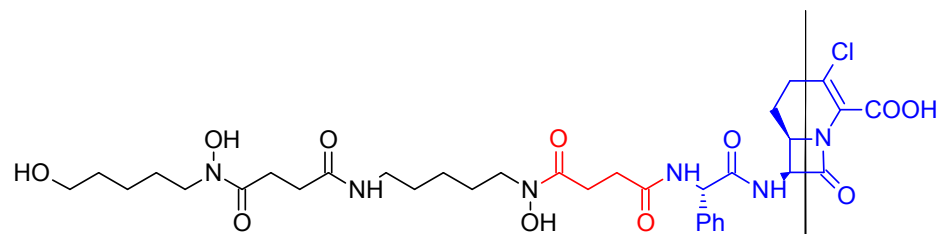

**2b**

$^1\text{H-NMR}$  (600 MHz,  $\text{CD}_3\text{OD}$ )

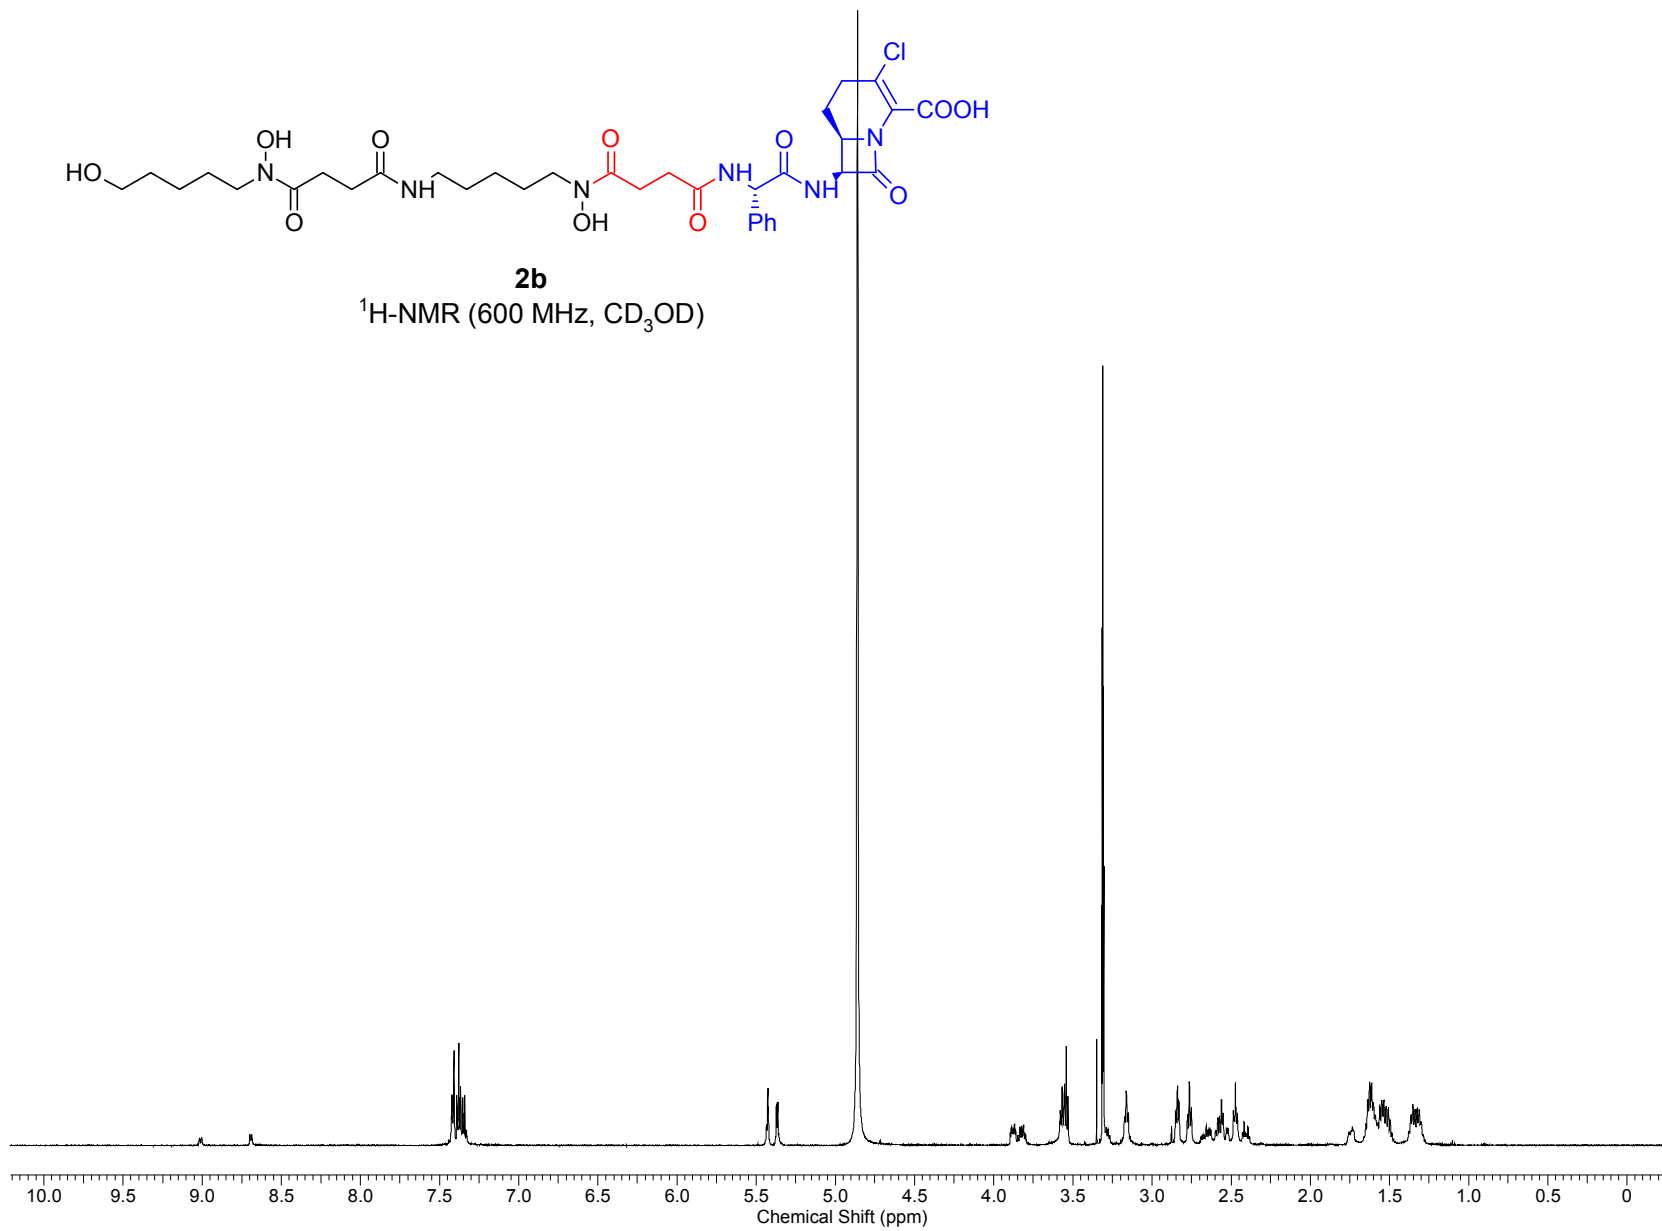

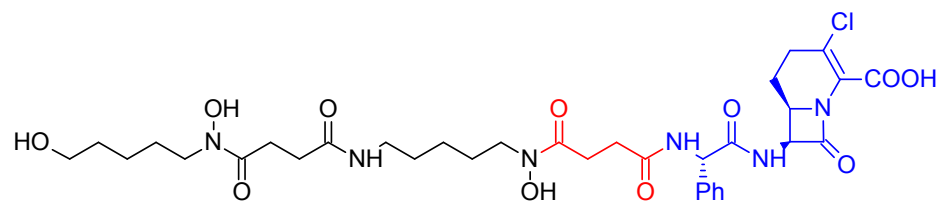

**2b**

$^{13}\text{C}$ -NMR (150 MHz,  $\text{CD}_3\text{OD}$ )

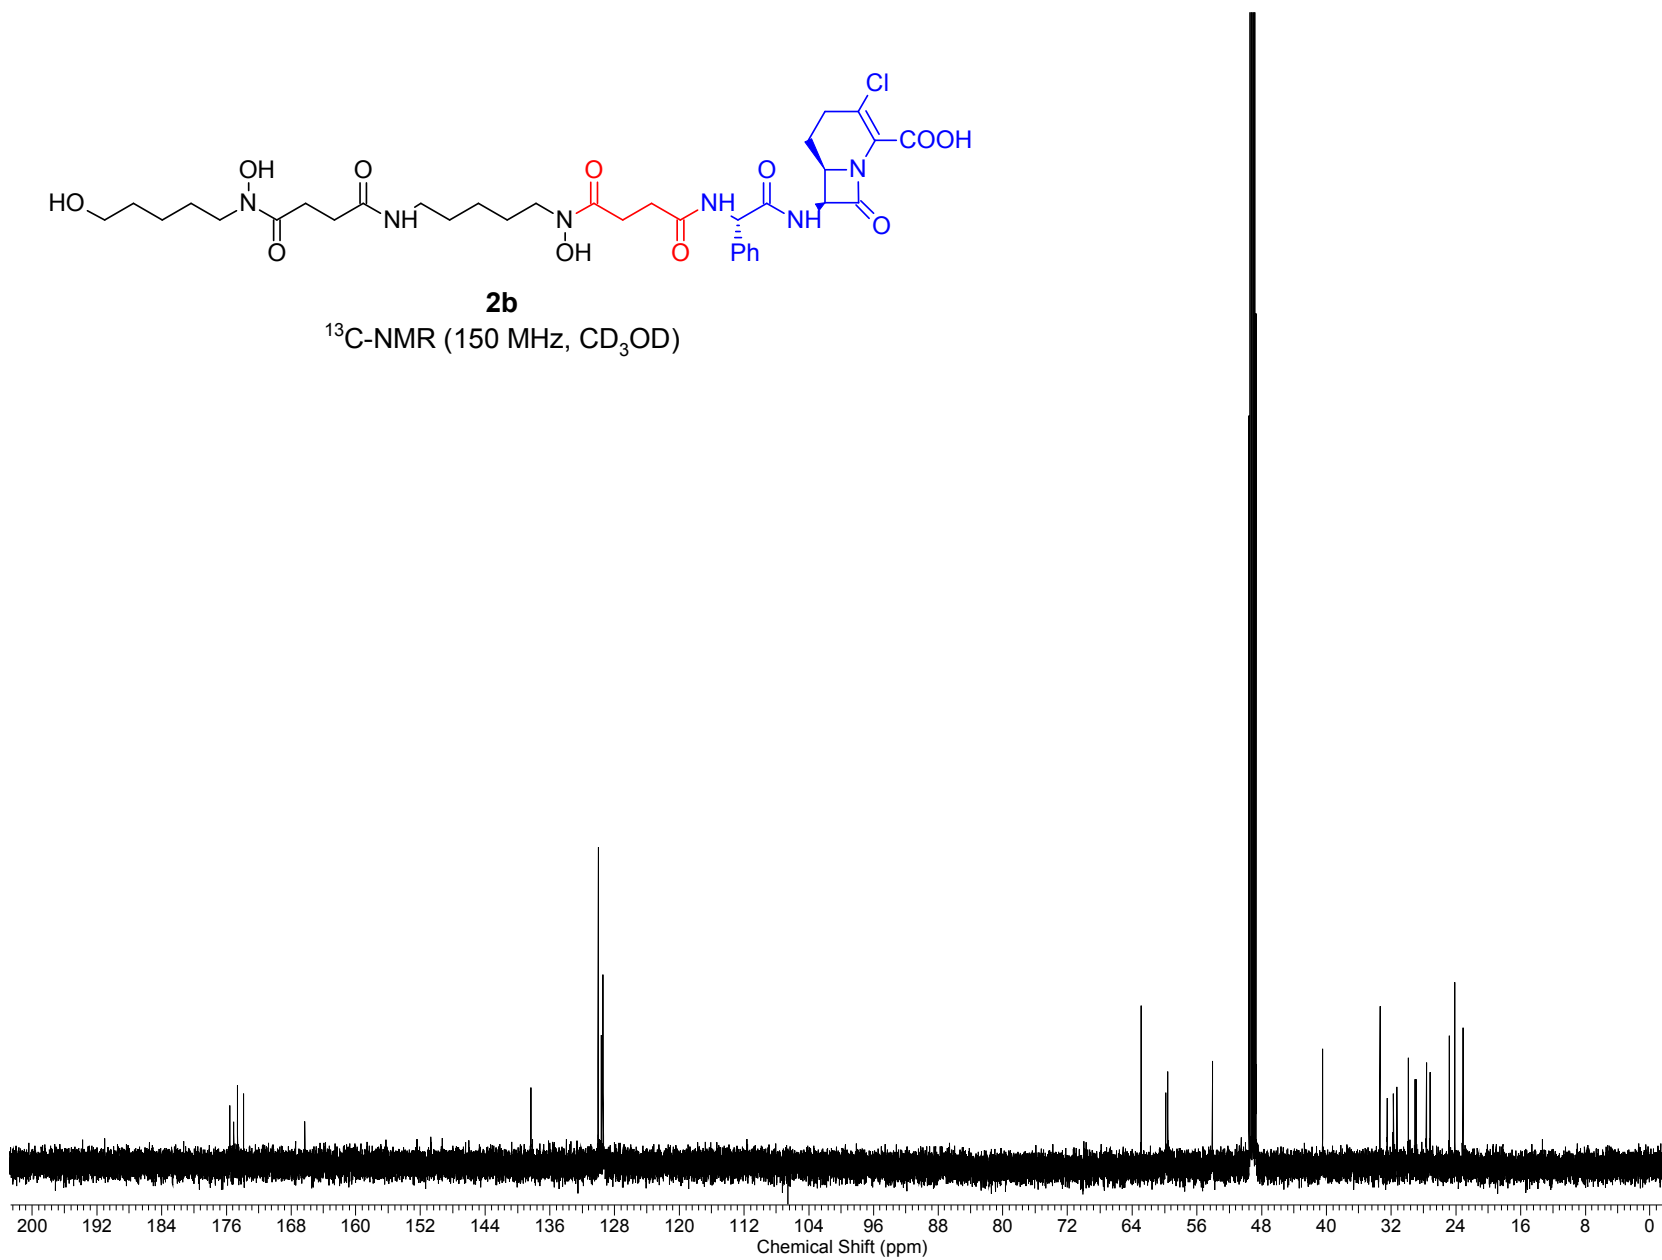

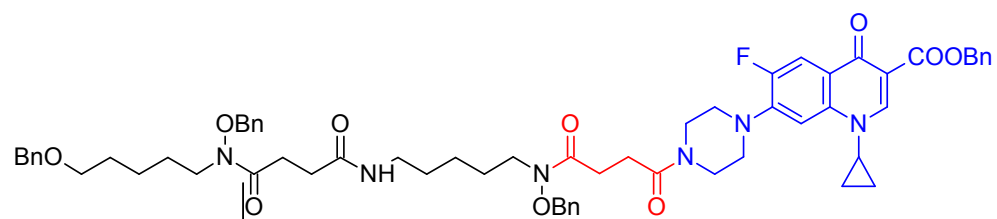

**14**

<sup>1</sup>H-NMR (600 MHz, CDCl<sub>3</sub>)

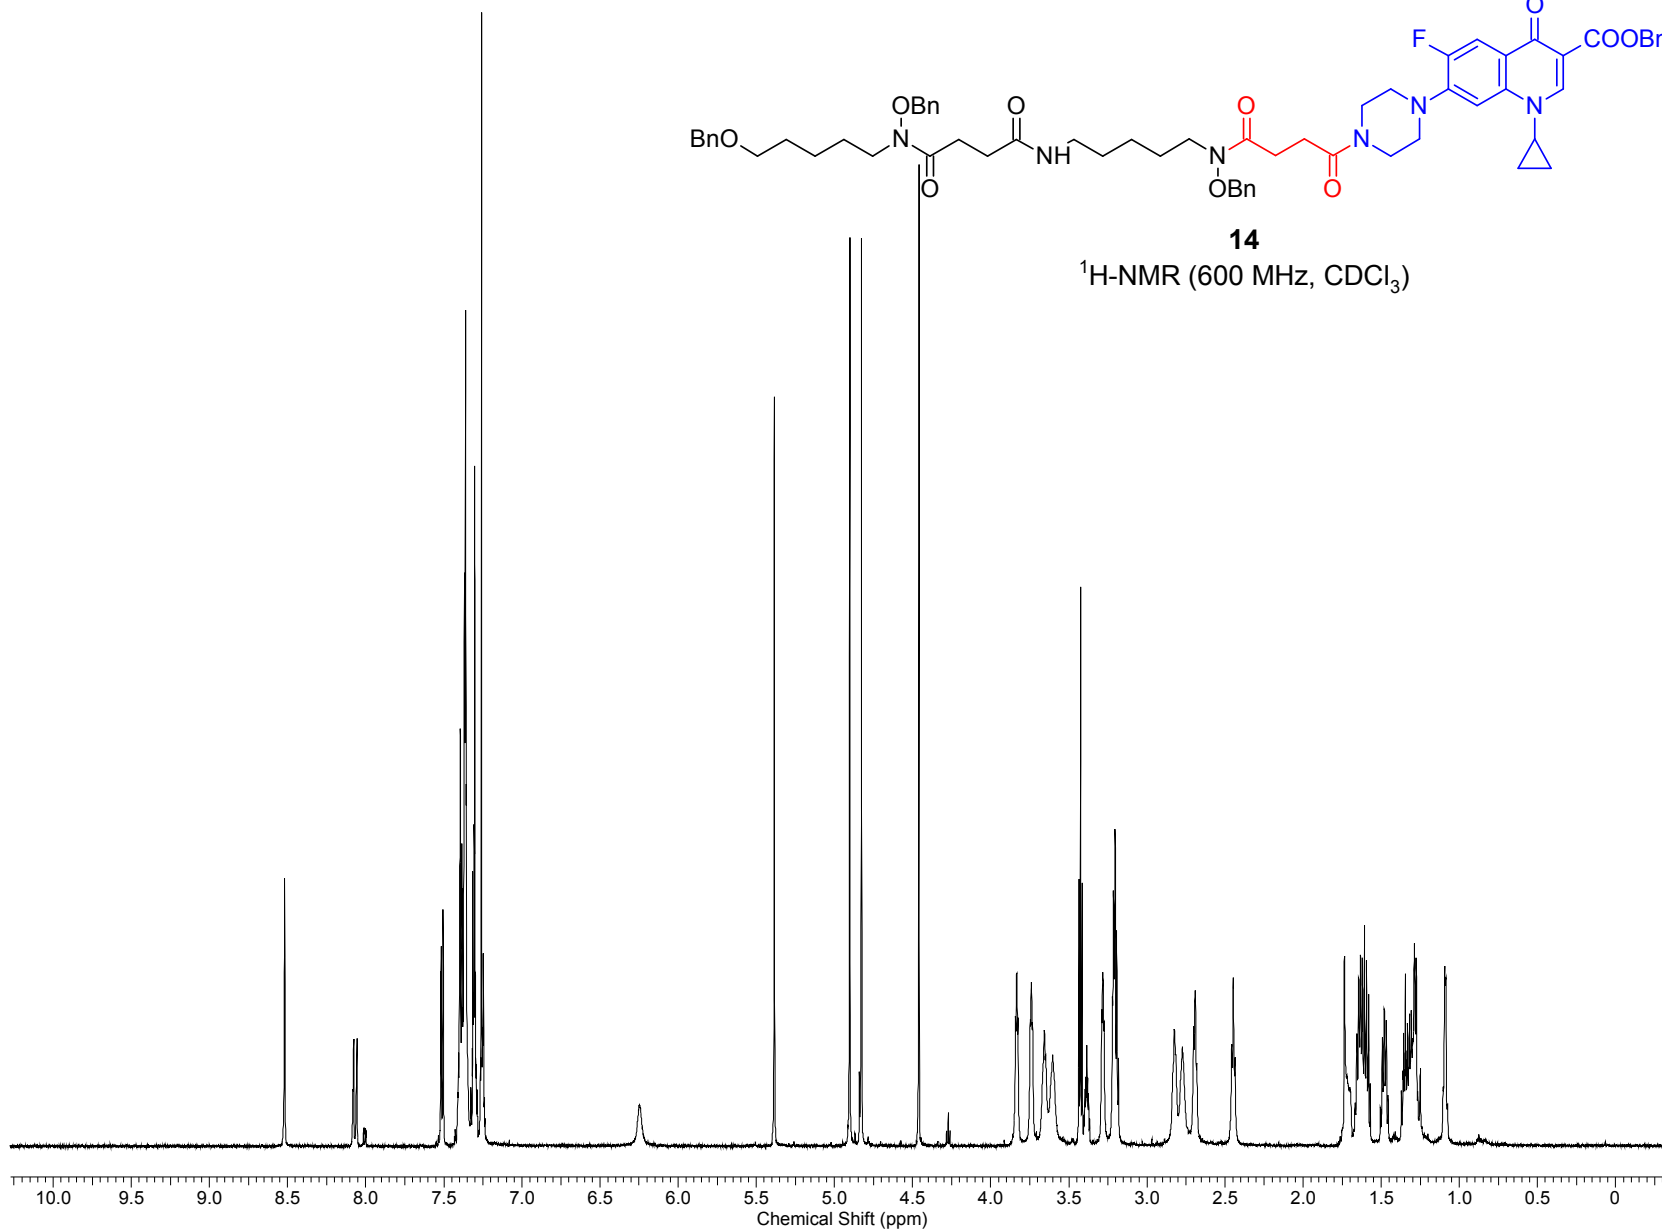

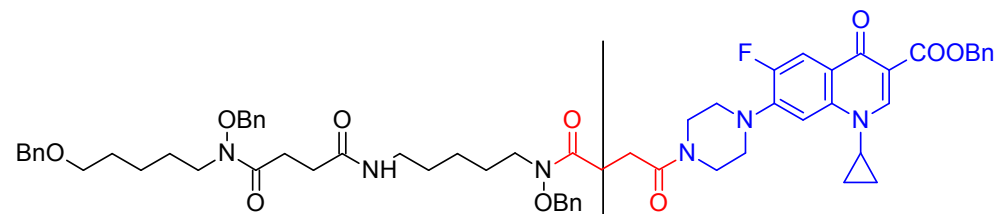

**14**

$^{13}\text{C}$ -NMR (150 MHz,  $\text{CDCl}_3$ )

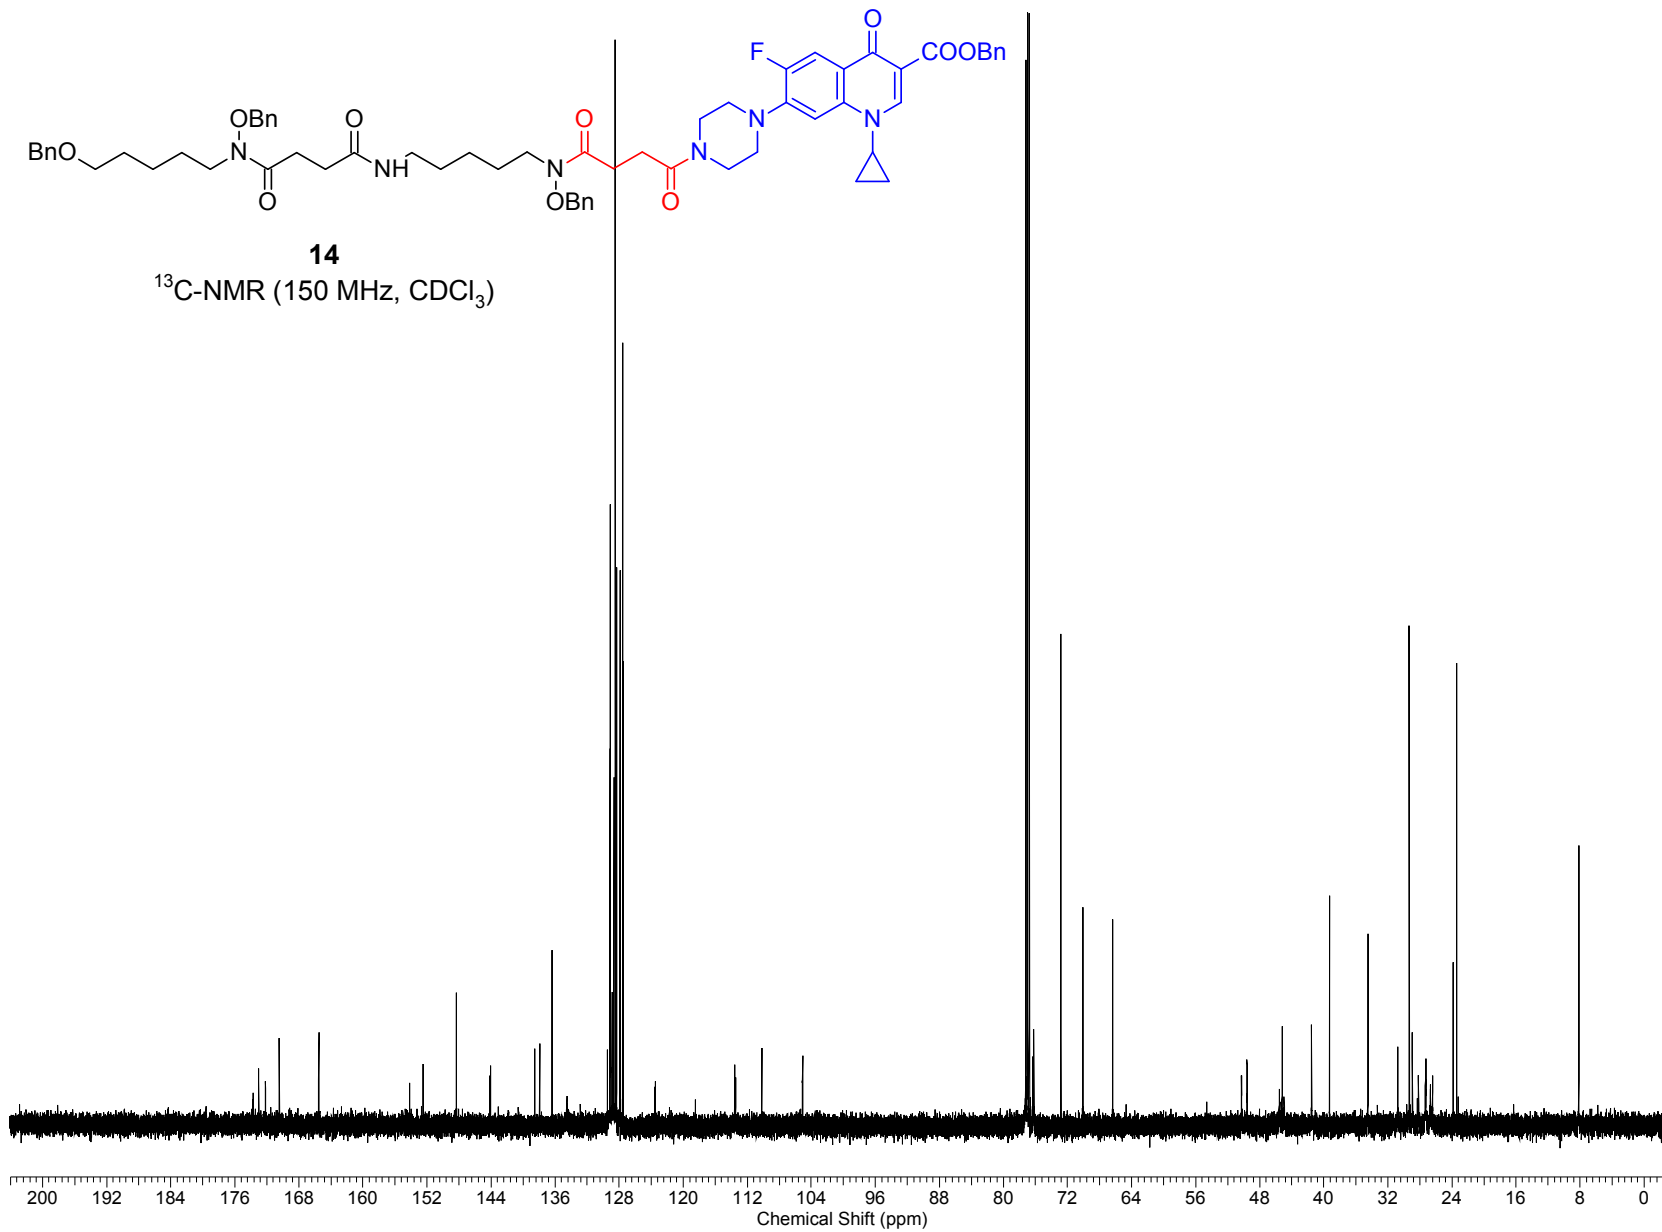

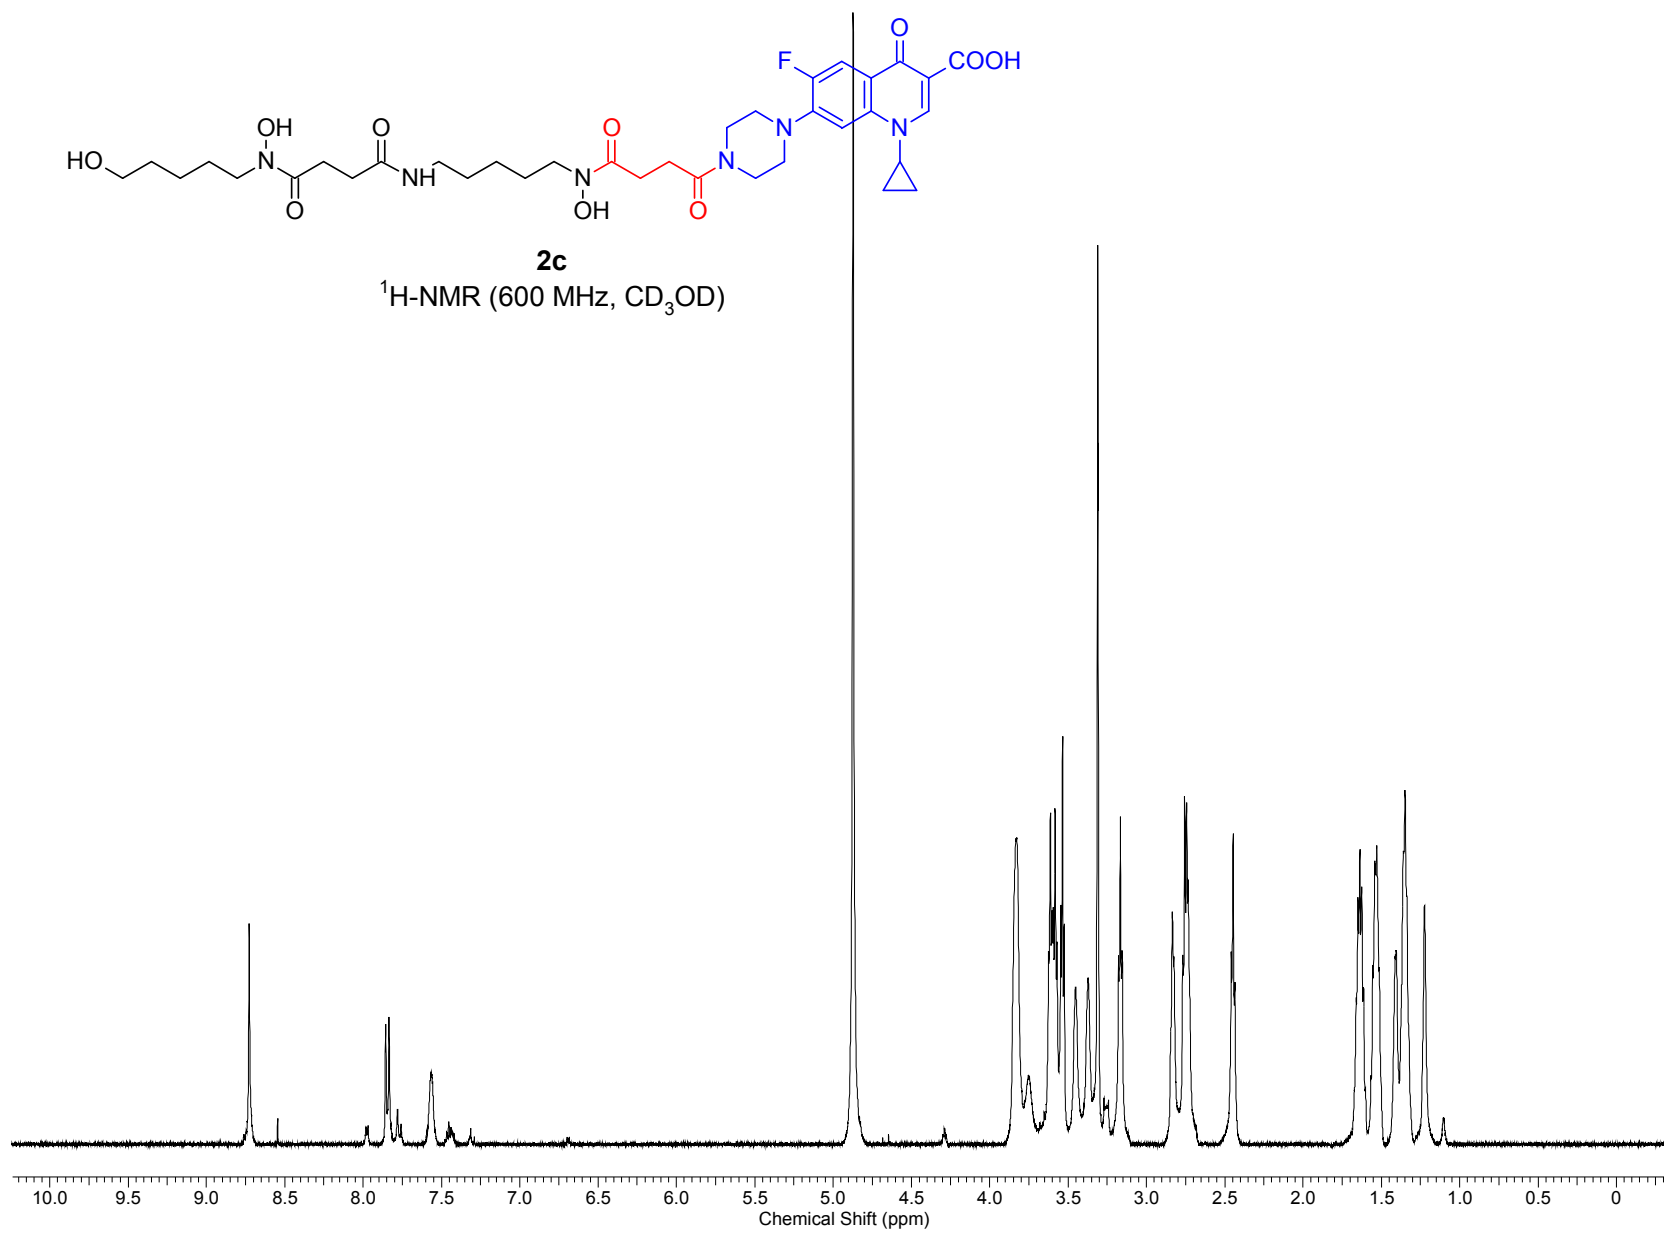

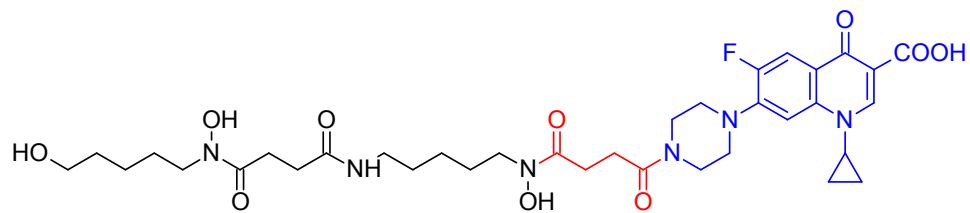

**2c**

$^{13}\text{C}$ -NMR (150 MHz,  $\text{CD}_3\text{OD}$ )

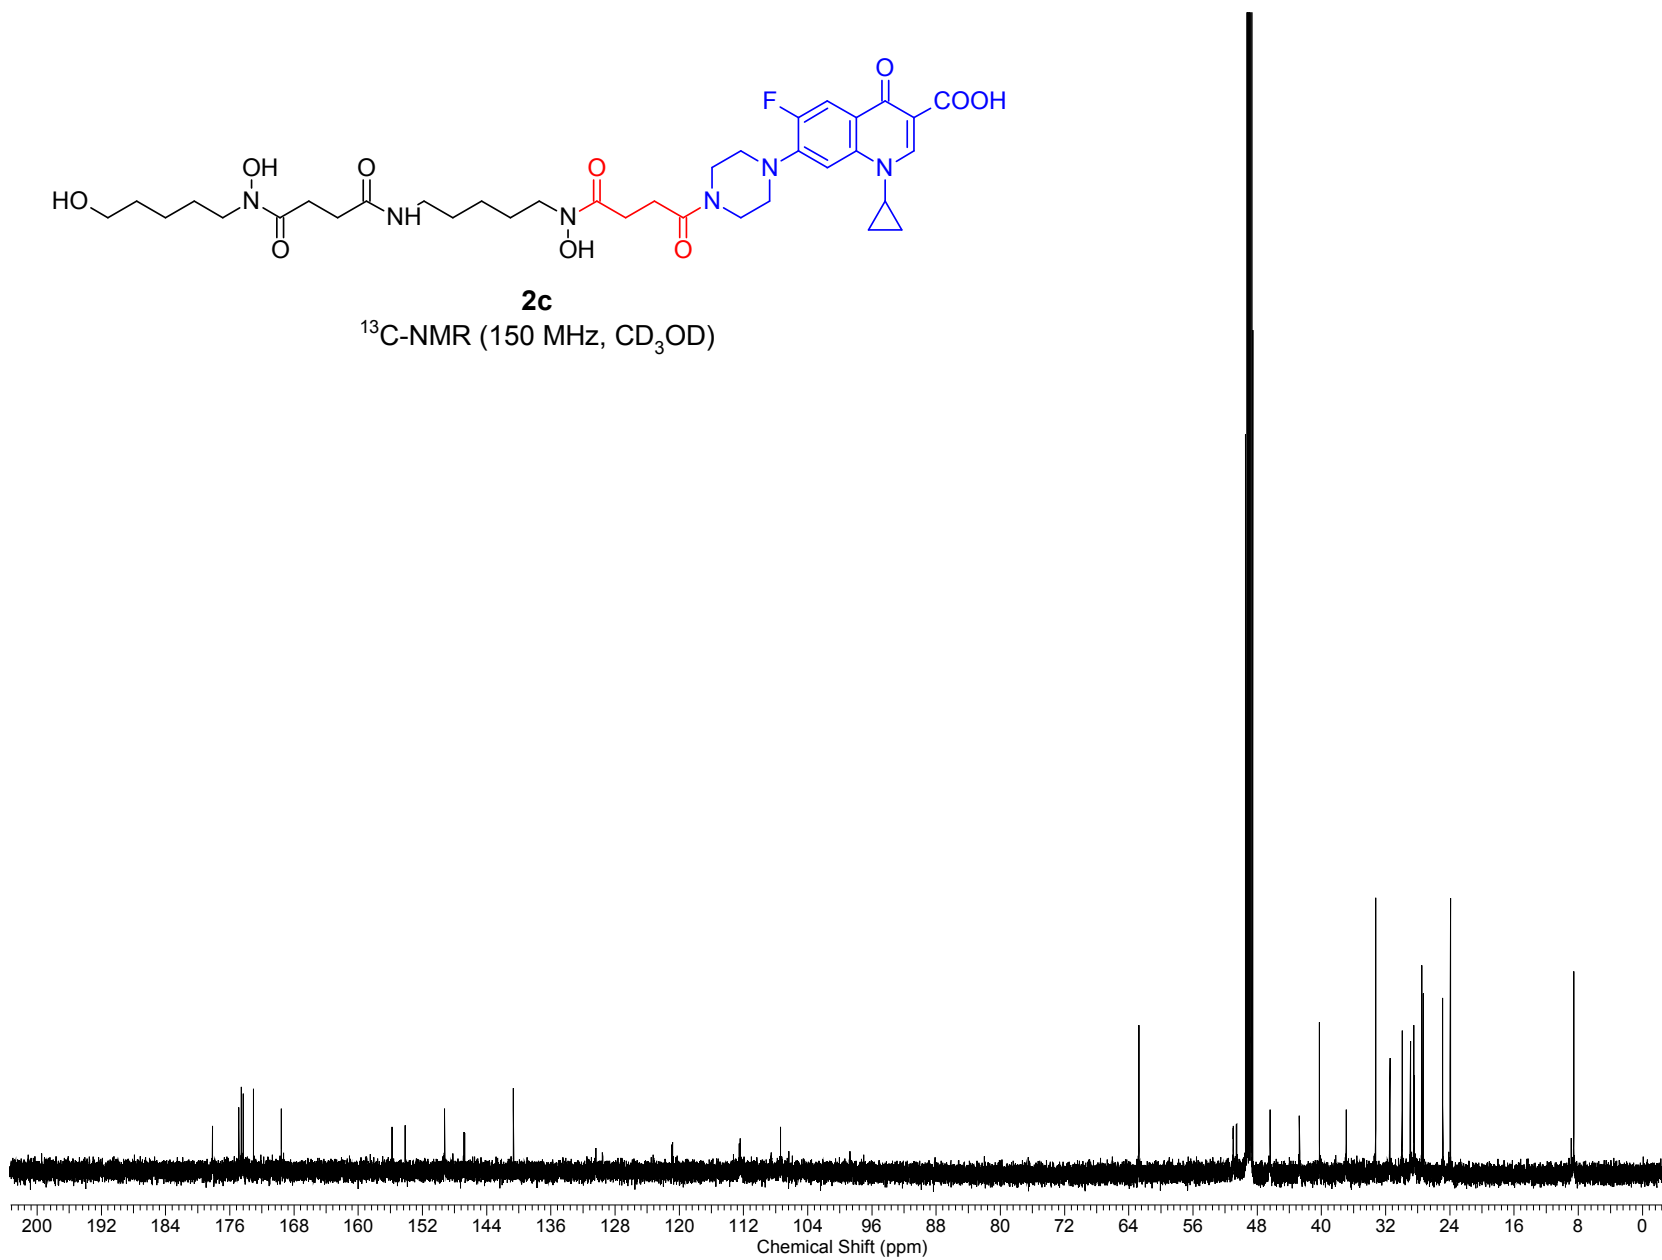

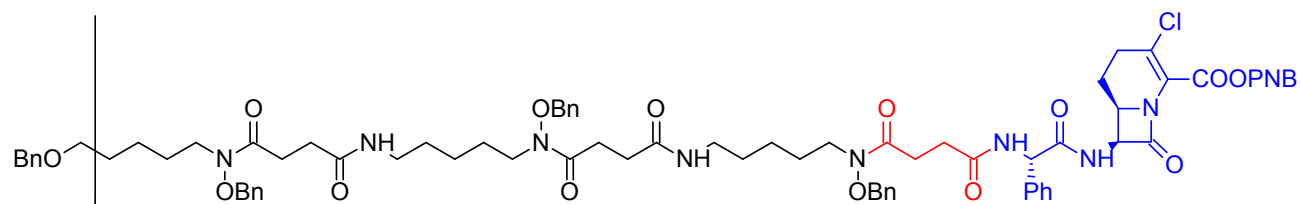

**15**

<sup>1</sup>H-NMR (500 MHz, CDCl<sub>3</sub>)

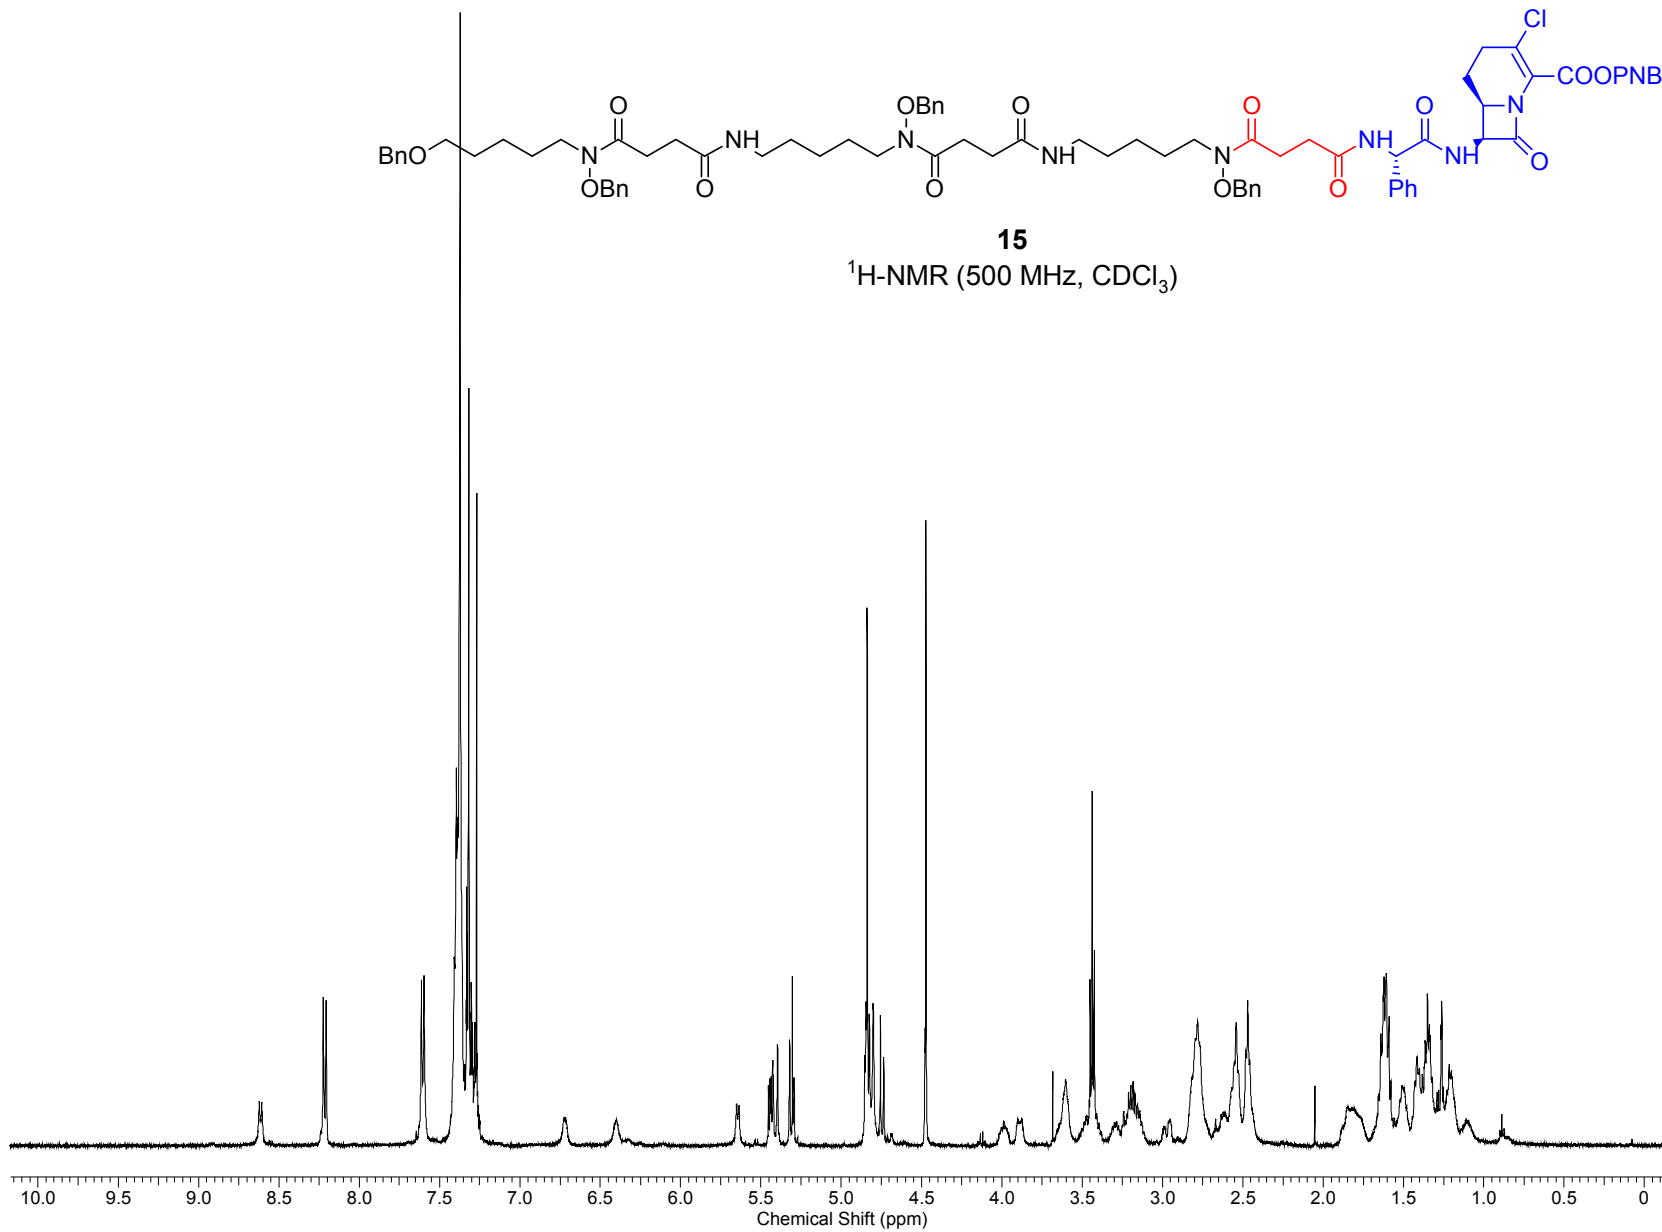

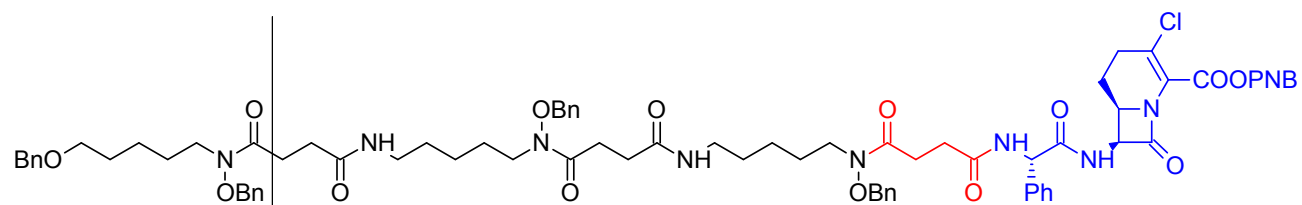

**15**

$^{13}\text{C}$ -NMR (125 MHz,  $\text{CDCl}_3$ )

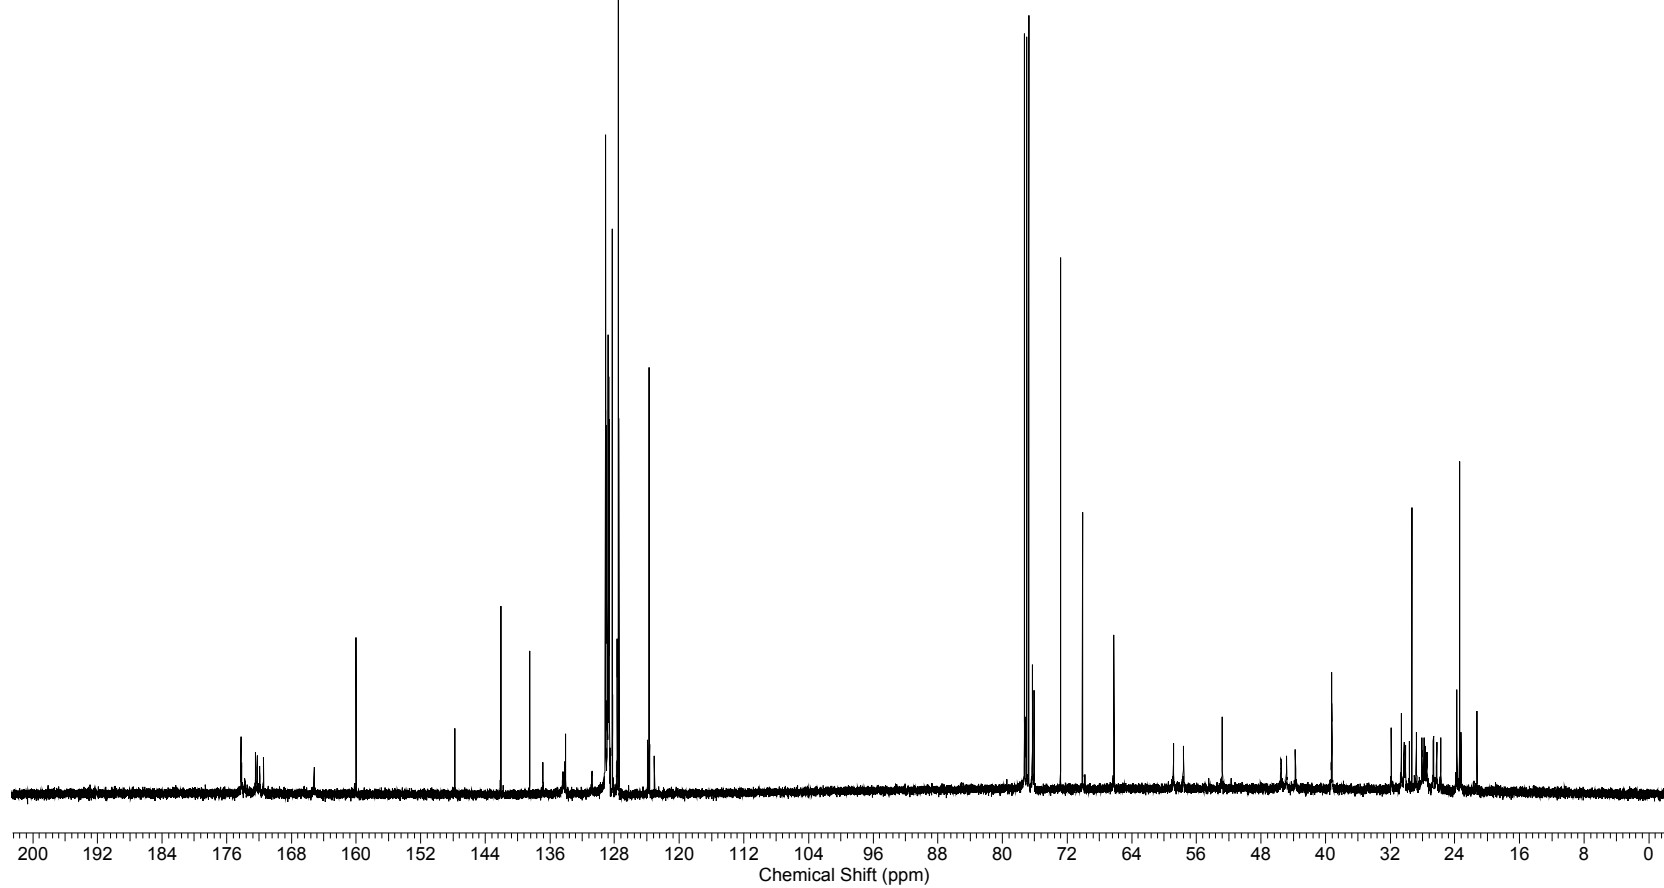

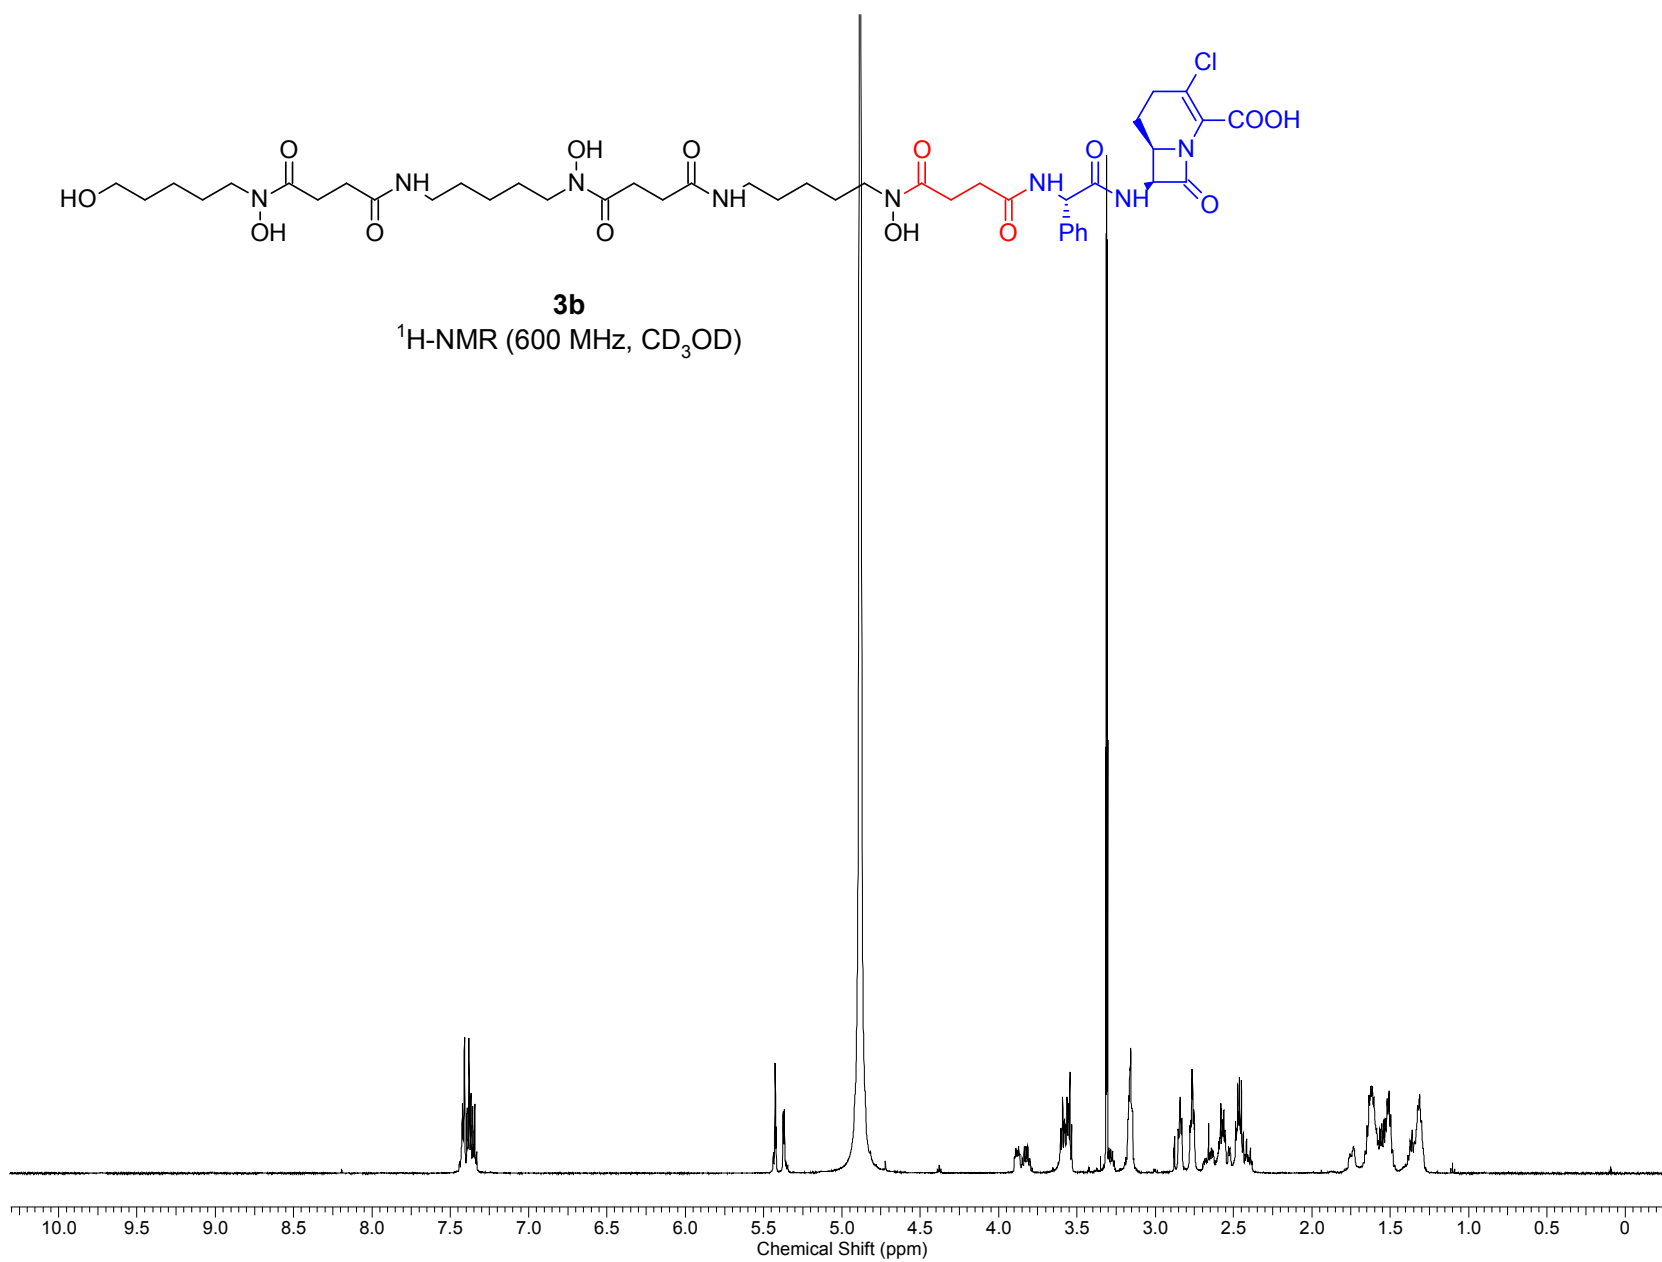

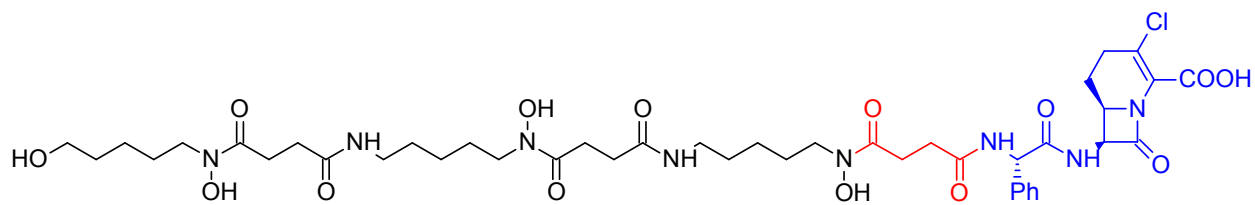

**3b**

$^{13}\text{C}$ -NMR (150 MHz,  $\text{CD}_3\text{OD}$ )

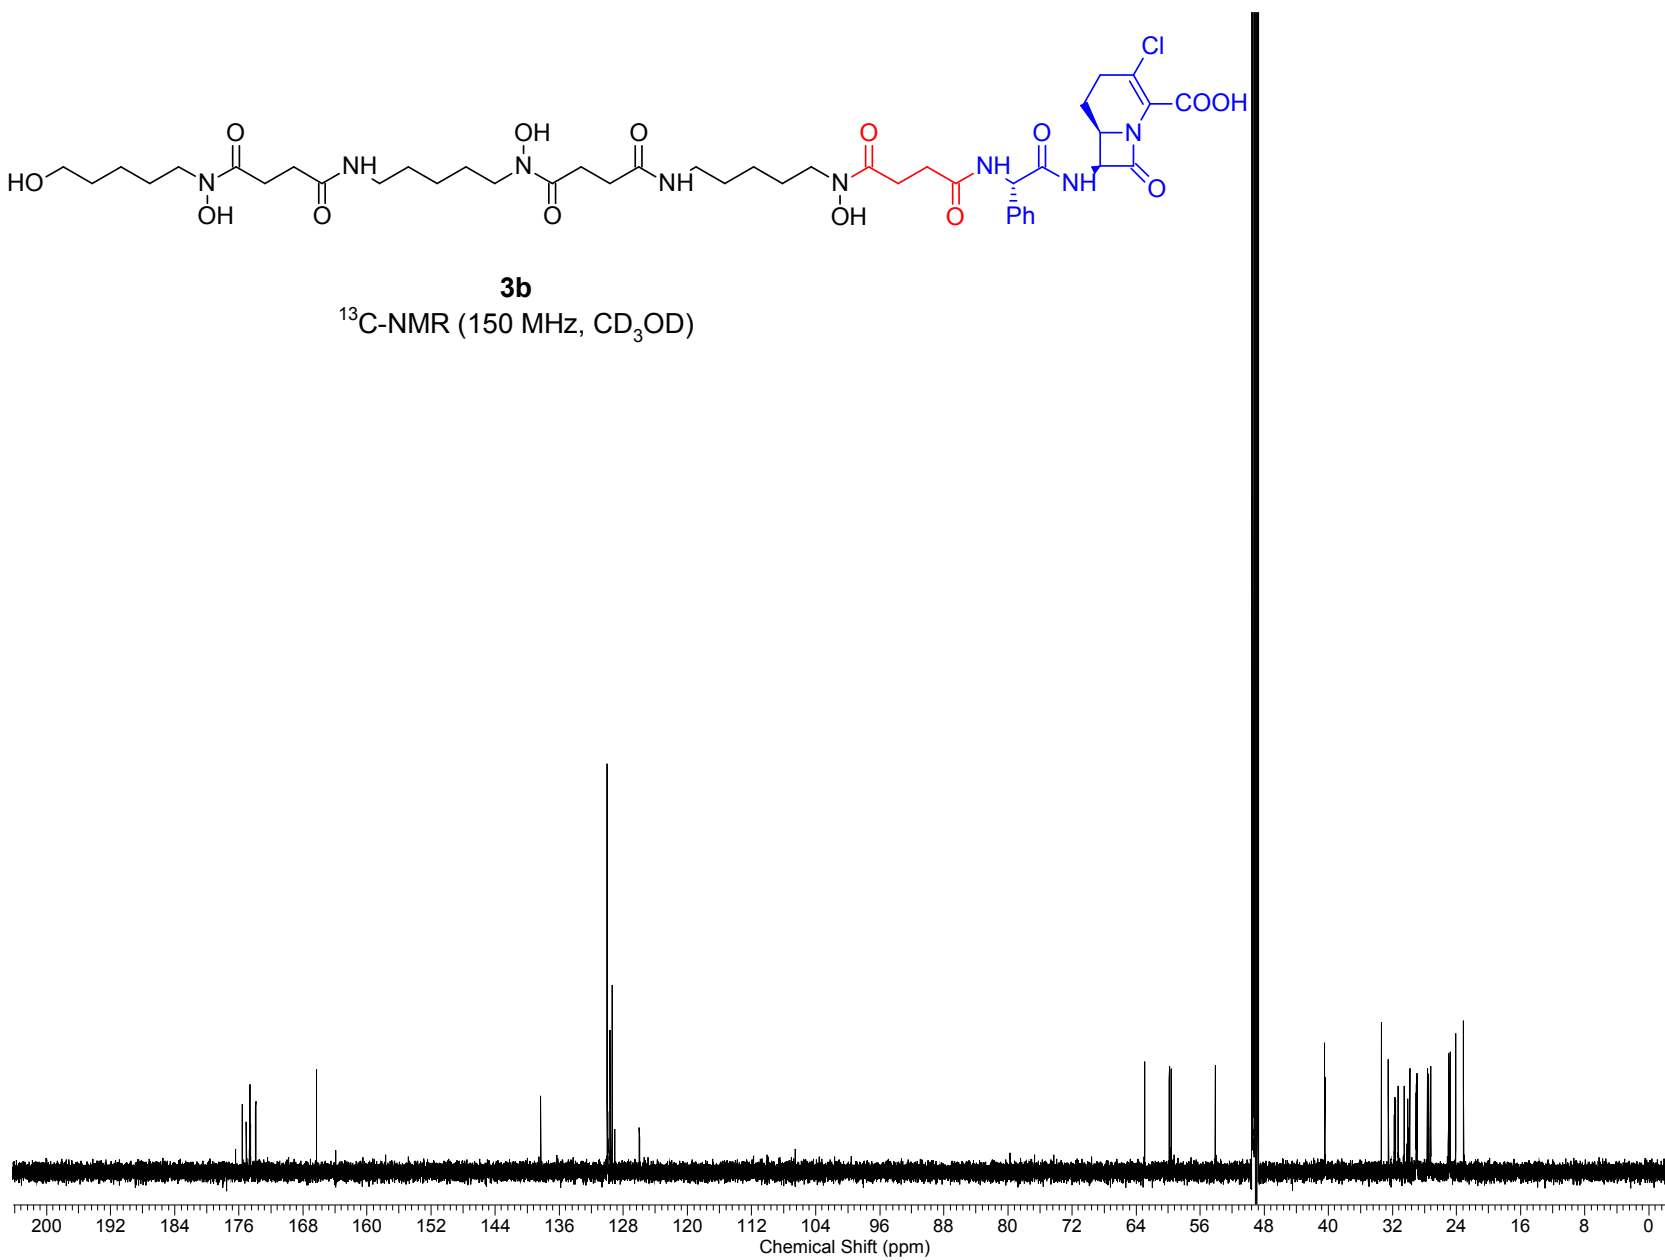

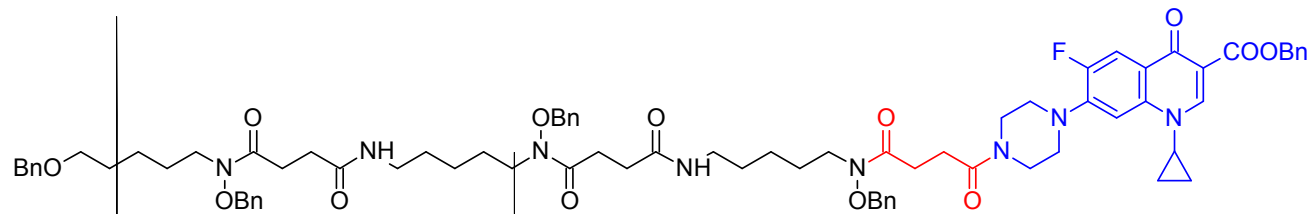

**16**

$^1\text{H-NMR}$  (600 MHz,  $\text{CDCl}_3$ )

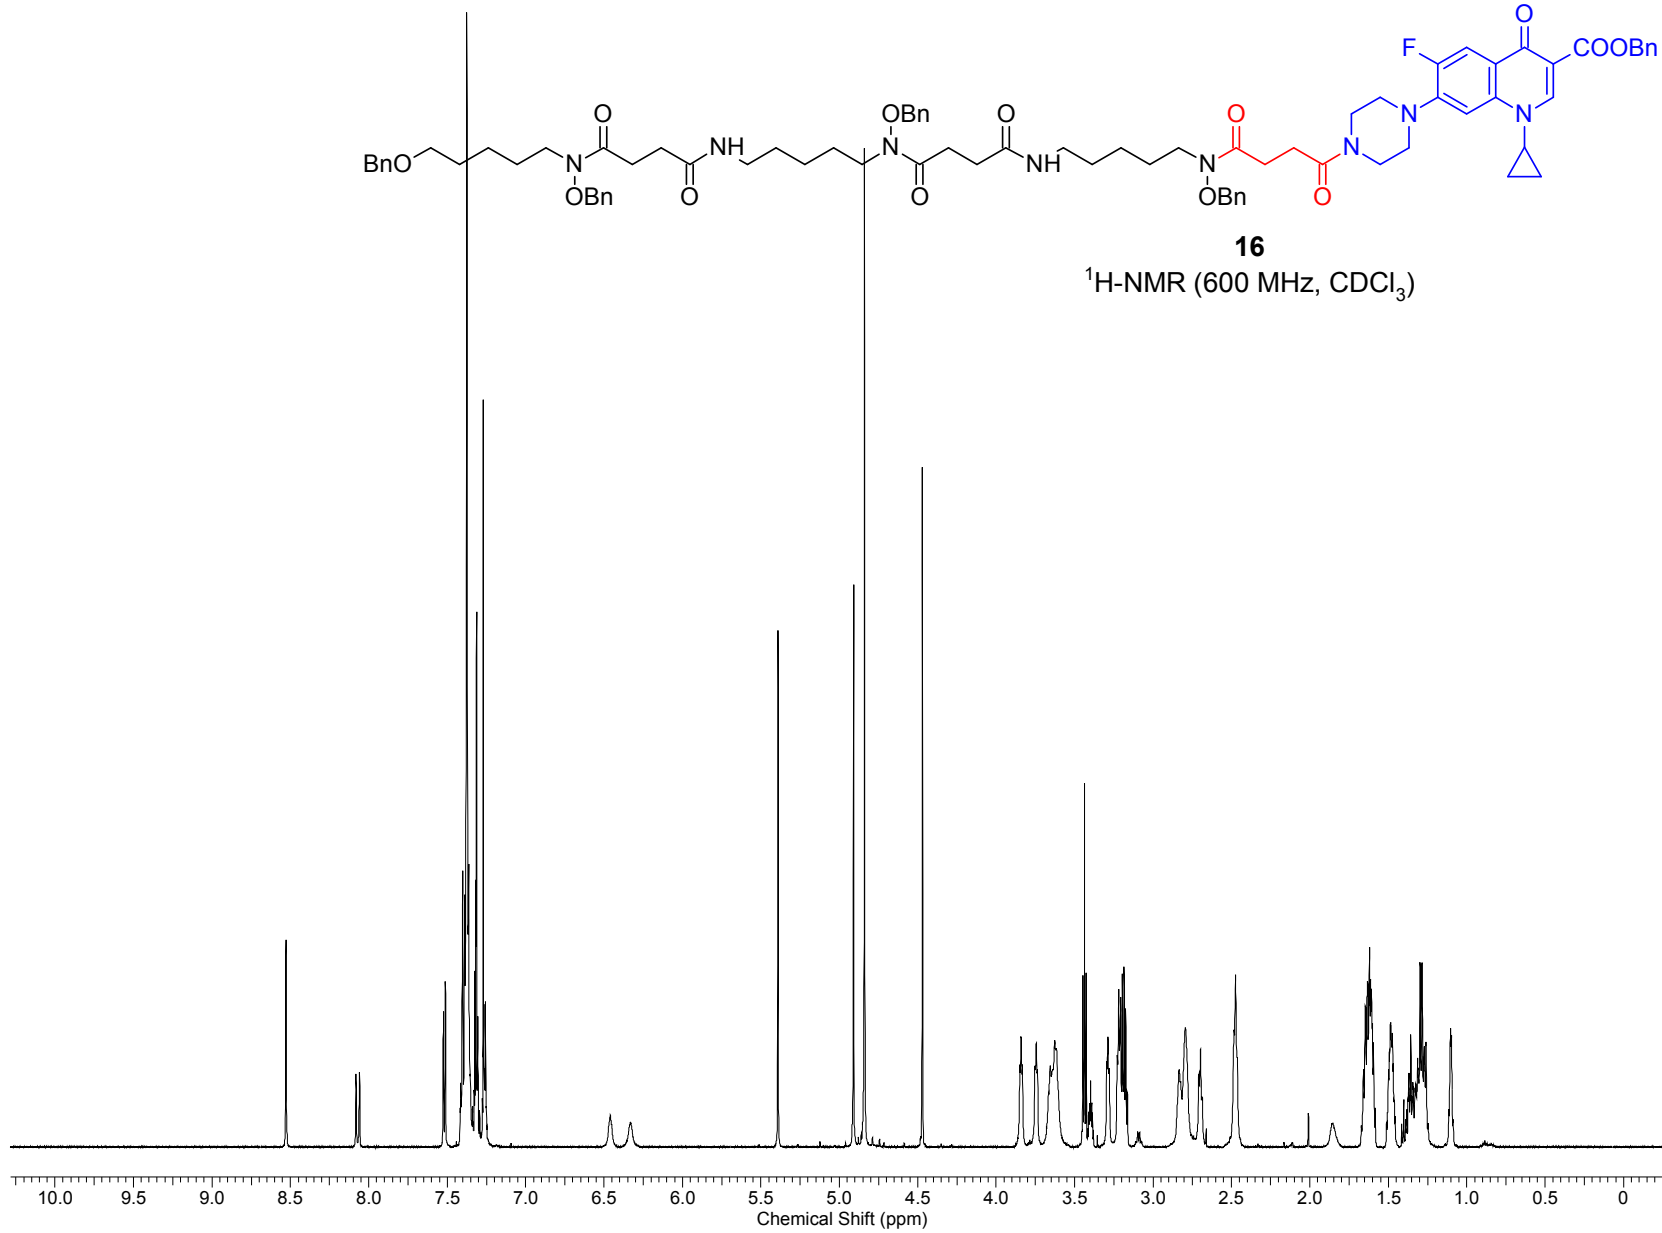

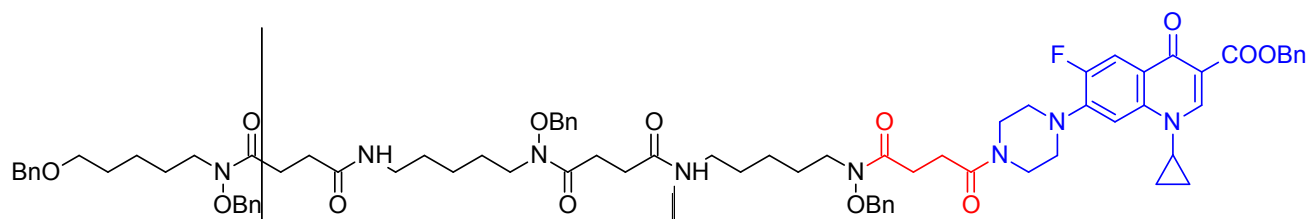

**16**

$^{13}\text{C}$ -NMR (150 MHz,  $\text{CDCl}_3$ )

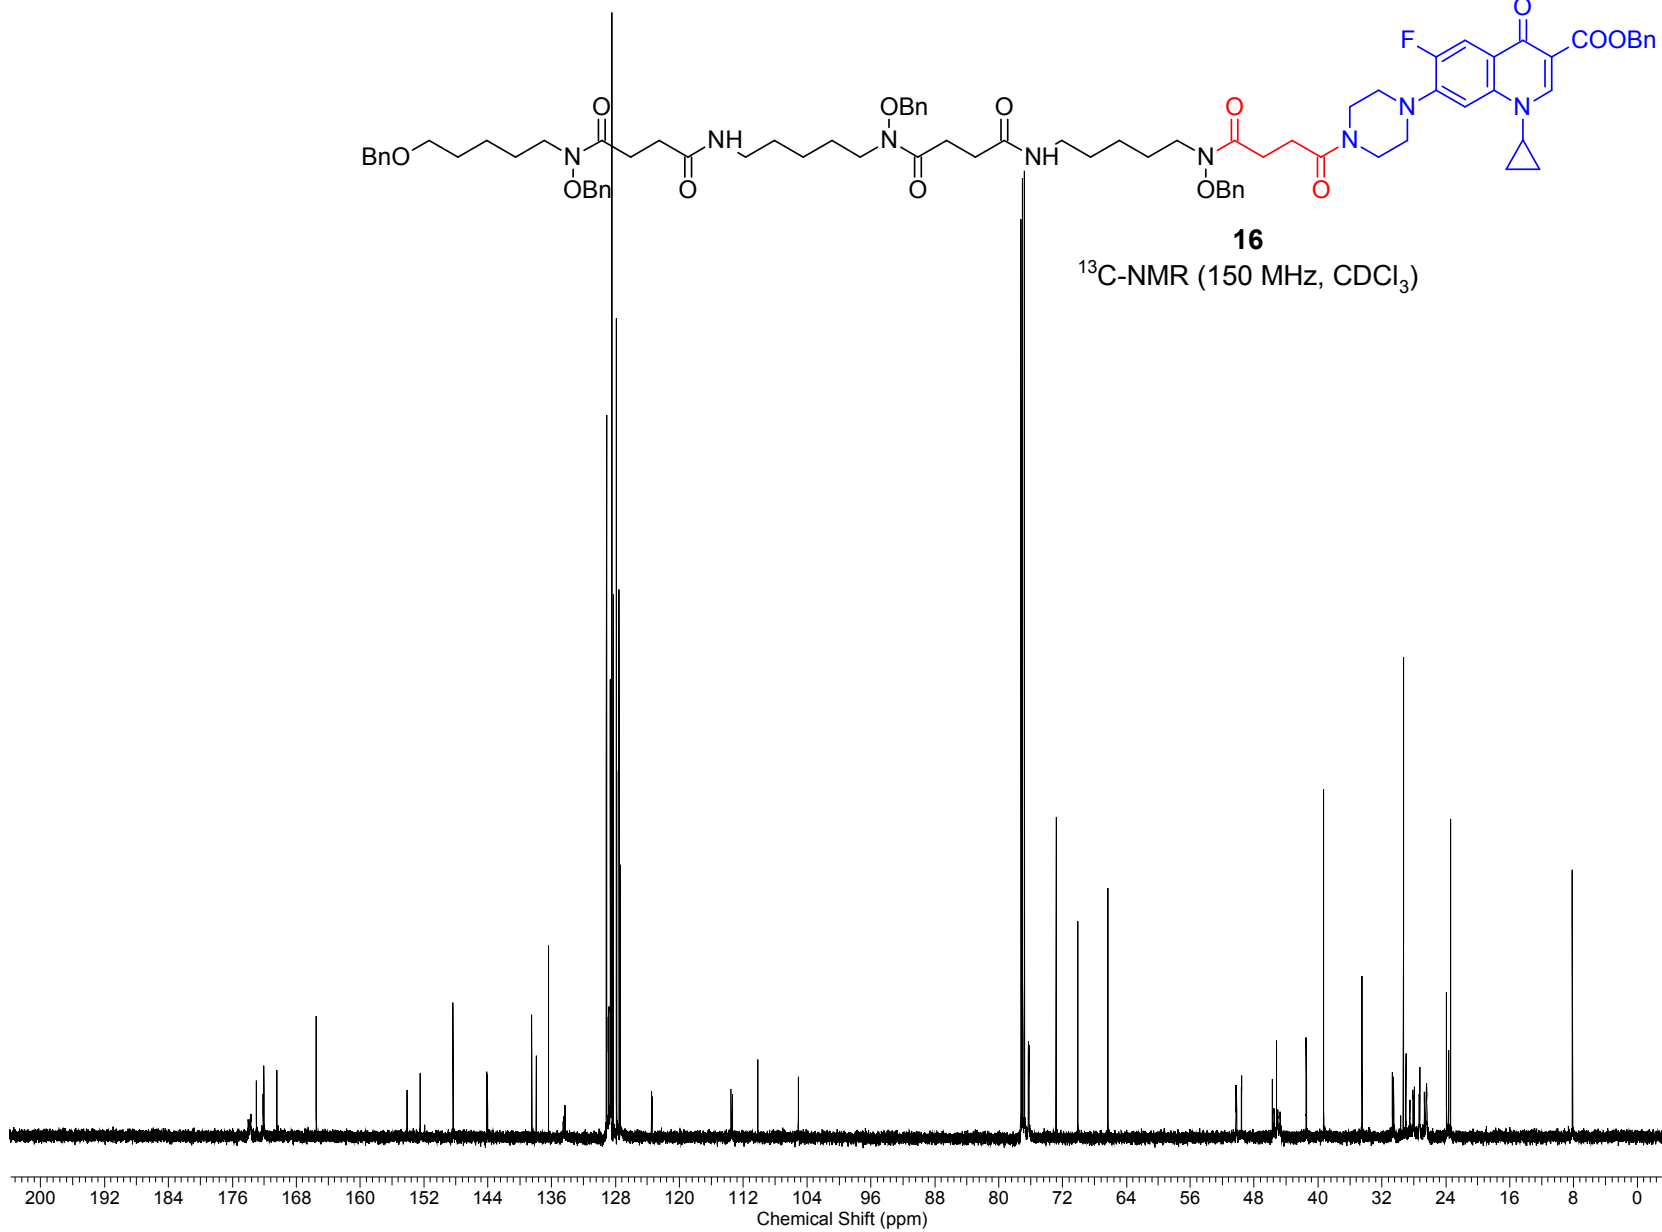

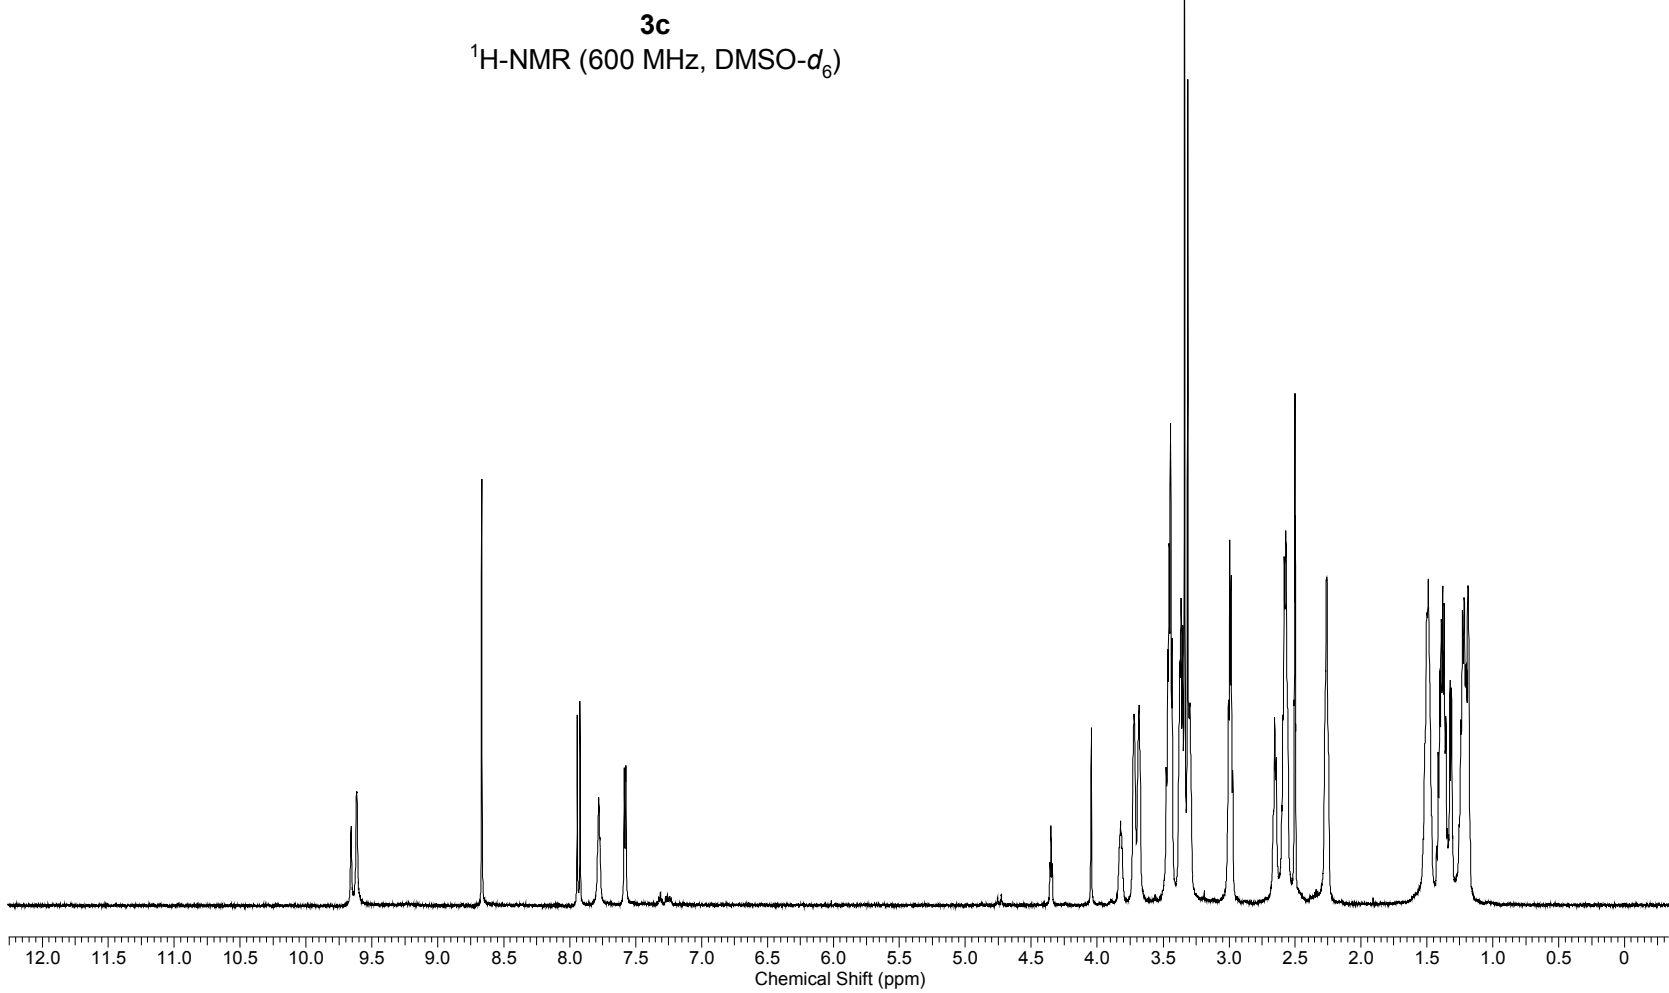

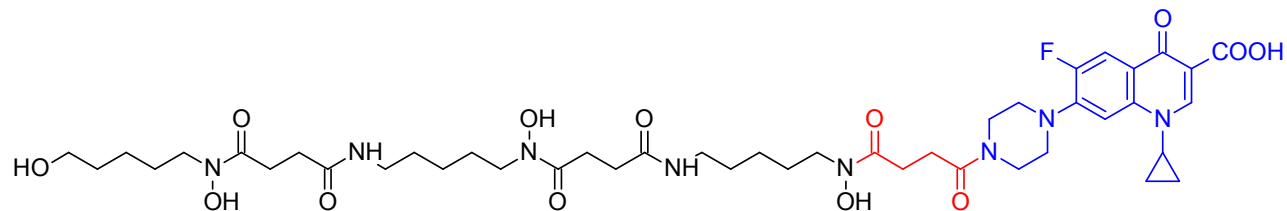

**3c**

$^{13}\text{C}$ -NMR (150 MHz,  $\text{DMSO}-d_6$ )

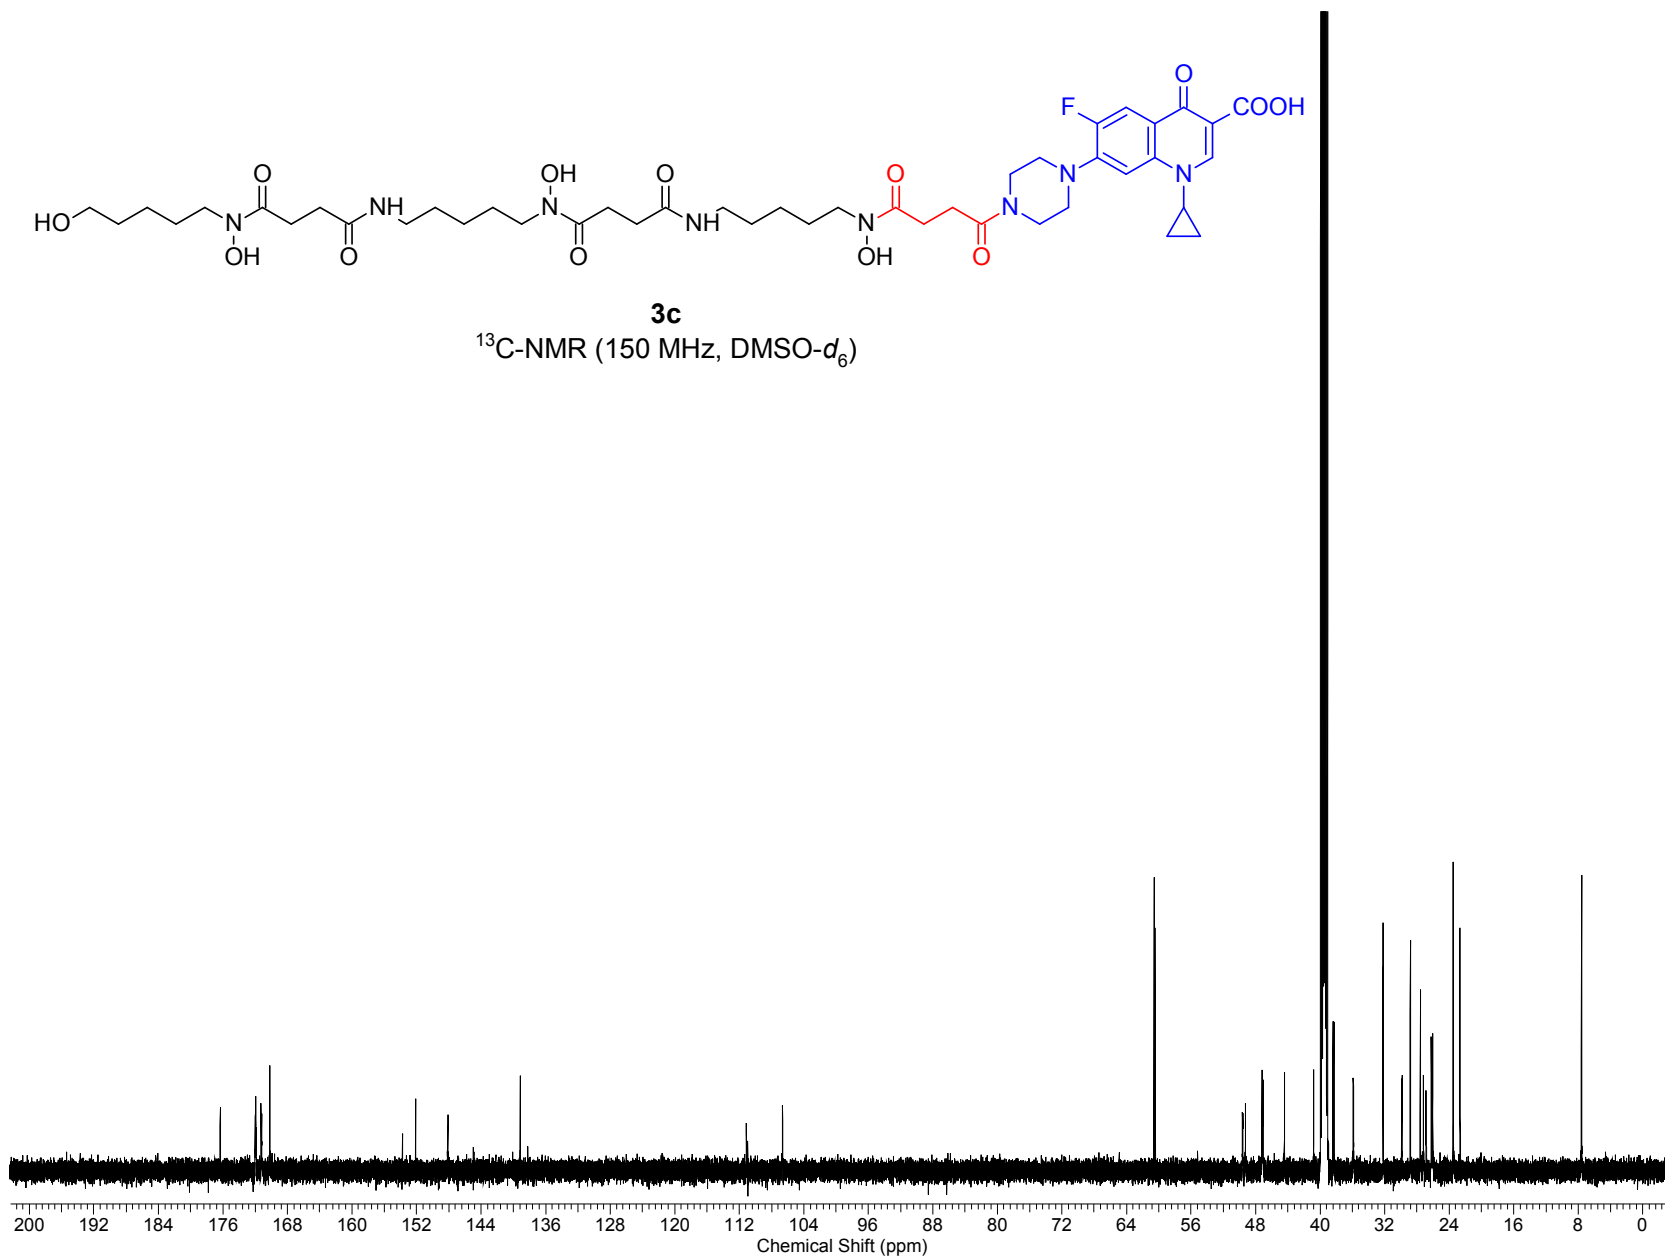

## VI. References

1. Richmond, M. H.; Clark, D. C.; Wotton, S. "Indirect method for assessing the penetration of beta-lactamase-nonsusceptible penicillins and cephalosporins in *Escherichia coli*." *Antimicrob. Agents Chemother.* **1976**, *10*, 215-218.
2. Zimmerman, W. "Penetration of  $\beta$ -lactam antibiotics into their target enzymes in *Pseudomonas aeruginosa*: Comparison of a highly sensitive mutant with its parent strain." *Antimicrob. Agents Chemother.* **1980**, *18*, 94-100.
3. An experimental procedure for this assay is provided in the main text. For literature example and general description of the modified Kirby-Bauer agar diffusion assay used in this study, see: (a) Afonin, S.; Glaser, R. W.; Berdichevskaya, M.; Wadhwani, P.; Gührs, K.-H.; Möllmann, U.; Perner, A.; Ulrich, A. S. "4-Fluoro-phenylglycine as a label for  $^{19}\text{F}$ -NMR structure analysis of membrane associated peptides." *ChemBioChem* **2003**, *4*, 1151-1163. (b) Wenciewicz, T. A.; Yang, B.; Rudloff, J. R.; Oliver, A. G.; Miller, M. J. "N-O Chemistry for antibiotics: Discovery of *N*-alkyl-*N*-(pyridin-2-yl)hydroxylamine scaffolds as selective antibacterial agents using nitroso Diels-Alder and ene chemistry." *J. Med. Chem.* **2011**, *54*, 6843-6858.
4. Roosenberg, J. M., Jr.; Miller, M. J. "Total synthesis of the siderophore danoxamine." *J. Org. Chem.* **2000**, *65*, 4833-4838.
5. Wenciewicz, T. A.; Oliver, A. G.; Miller, M. J. "Iron(III)-templated macrolactonization of trihydroxamate siderophores." *Org. Lett.* **2012**, *14*, 4390-4393.
